# Supplementary material for: Retrospective cohort study to characterise the blood pressure response to spironolactone in patients with apparent therapy-resistant hypertension using electronic medical record data
Source: PubMed Central journal article supplement — BMJ Open. 2020 May 26;10(5):e033100. doi: 10.1136/bmjopen-2019-033100 (PMC7259833; doi:10.1136/bmjopen-2019-033100), 2020-05-26
Supplement: bmjopen-2019-033100.draft_revisions.pdf [file bmjopen-2019-033100.draft_revisions.pdf]

# BMJ Open

BMJ Open is committed to open peer review. As part of this commitment we make the peer review history of every article we publish publicly available.

When an article is published we post the peer reviewers' comments and the authors' responses online. We also post the versions of the paper that were used during peer review. These are the versions that the peer review comments apply to.

The versions of the paper that follow are the versions that were submitted during the peer review process. They are not the versions of record or the final published versions. They should not be cited or distributed as the published version of this manuscript.

BMJ Open is an open access journal and the full, final, typeset and author-corrected version of record of the manuscript is available on our site with no access controls, subscription charges or pay-per-view fees (<http://bmjopen.bmj.com>).

If you have any questions on BMJ Open's open peer review process please email [info.bmjopen@bmj.com](mailto:info.bmjopen@bmj.com)

# BMJ Open

## Characteristics in the Electronic Medical Record Associated with Blood Pressure Response to Spironolactone in Patients with Resistant Hypertension

|                               |                                                                                                                                                                                                                                                                             |
|-------------------------------|-----------------------------------------------------------------------------------------------------------------------------------------------------------------------------------------------------------------------------------------------------------------------------|
| Journal:                      | <i>BMJ Open</i>                                                                                                                                                                                                                                                             |
| Manuscript ID                 | bmjopen-2019-033100                                                                                                                                                                                                                                                         |
| Article Type:                 | Research                                                                                                                                                                                                                                                                    |
| Date Submitted by the Author: | 19-Jul-2019                                                                                                                                                                                                                                                                 |
| Complete List of Authors:     | Shuey, Megan; Vanderbilt University Medical Center, Perkins, Bradley<br>Nian, Hui; Vanderbilt University Department of Biostatistics, Yu, Chang; Vanderbilt University School of Medicine, Luther, James<br>Brown, Nancy J.; Vanderbilt University Medical Center, Medicine |
| Keywords:                     | spironolactone, resistant hypertension, blood pressure response, mineralocorticoid receptor antagonist, electronic medical records                                                                                                                                          |
|                               |                                                                                                                                                                                                                                                                             |

SCHOLARONE™  
Manuscripts

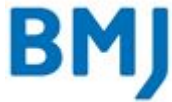

I, the Submitting Author has the right to grant and does grant on behalf of all authors of the Work (as defined in the below author licence), an exclusive licence and/or a non-exclusive licence for contributions from authors who are: i) UK Crown employees; ii) where BMJ has agreed a CC-BY licence shall apply, and/or iii) in accordance with the terms applicable for US Federal Government officers or employees acting as part of their official duties; on a worldwide, perpetual, irrevocable, royalty-free basis to BMJ Publishing Group Ltd ("BMJ") its licensees and where the relevant Journal is co-owned by BMJ to the co-owners of the Journal, to publish the Work in this journal and any other BMJ products and to exploit all rights, as set out in our [licence](#).

The Submitting Author accepts and understands that any supply made under these terms is made by BMJ to the Submitting Author unless you are acting as an employee on behalf of your employer or a postgraduate student of an affiliated institution which is paying any applicable article publishing charge ("APC") for Open Access articles. Where the Submitting Author wishes to make the Work available on an Open Access basis (and intends to pay the relevant APC), the terms of reuse of such Open Access shall be governed by a Creative Commons licence – details of these licences and which [Creative Commons](#) licence will apply to this Work are set out in our licence referred to above.

Other than as permitted in any relevant BMJ Author's Self Archiving Policies, I confirm this Work has not been accepted for publication elsewhere, is not being considered for publication elsewhere and does not duplicate material already published. I confirm all authors consent to publication of this Work and authorise the granting of this licence.

1  
2  
3 **Characteristics in the Electronic Medical Record Associated with Blood Pressure**  
4  
5 **Response to Spironolactone in Patients with Resistant Hypertension**  
6  
7  
8  
9

10 Megan M. Shuey, Ph.D.;<sup>1</sup> Bradley Perkins, B.S.;<sup>1</sup> Hui Nian, Ph.D.;<sup>2</sup> Chang Yu, Ph.D.;<sup>2</sup>  
11  
12 James M. Luther, M.D.;<sup>1</sup> Nancy J. Brown, M.D.<sup>1\*</sup>  
13  
14

15  
16  
17 Departments of Medicine<sup>1</sup> and Biostatistics,<sup>2</sup> Vanderbilt University School of Medicine,  
18  
19 Nashville, TN.  
20  
21

22  
23  
24 **\*Corresponding author:**  
25

26 Nancy J. Brown, M.D.

27  
28 D-3100 Medical Center North  
29

30  
31 Vanderbilt University School of Medicine  
32

33 Nashville, TN, 37232-2358  
34

35 Fax: (615) 343-2551  
36

37  
38 Tel.:(615) 343-8701  
39

40 Email: nancy.j.brown@vumc.org  
41  
42  
43

44 **Word Count:** 3,417  
45  
46  
47  
48  
49  
50  
51  
52  
53  
54  
55  
56  
57  
58  
59  
60

## ABSTRACT

**Objective:** Identify blood pressure (BP) response to spironolactone in patients with resistant hypertension using electronic medical records (EMRs) in order to estimate response in a real-world clinical setting.

**Design:** Developed an algorithm to determine BP and electrolyte response to spironolactone.

**Setting:** An academic medical center in Nashville, Tennessee

**Population:** Patients with resistant hypertension prescribed spironolactone.

**Main Outcome Measures:** Baseline BP and BP response, determined as the change in mean systolic and diastolic BP (SBP and DBP, respectively) following spironolactone initiation. Additional response measures were serum sodium, potassium, and creatinine, estimated glomerular filtration rate, hemoglobin A1c (HbA1c), glucose, high density lipoprotein, low density lipoprotein, triglycerides. Demographic characteristics included race, age, gender, body mass index (BMI), diabetes mellitus, chronic kidney disease stage three, ischemic heart disease, and smoking.

**Results:** The mean decreases in SBP and DBP were 8.1 and 3.4 mmHg, consistent with clinical trial data. Using a mean decrease in SBP of five mmHg or in DBP of two mmHg to define “responders,” 30.3% of patients did not respond. In univariable analyses, responders had higher BMI, baseline SBP, DBP, sodium, and HbA1c, and lower creatinine. In multivariable analysis, responders were older and had significantly higher BMI and baseline SBP and DBP, and lower potassium. Increases in potassium and creatinine following spironolactone were larger in responders than in nonresponders.

When BP was evaluated as a continuous variable, decreases in SBP and DBP correlated

1  
2  
3 with baseline BP, decrease in sodium, and increases in potassium and creatinine  
4  
5 following spironolactone. Decreasing SBP was associated with decreasing glucose in  
6  
7 European Americans.  
8  
9

10 **Conclusions:** We developed an algorithm to assess BP response to spironolactone, a  
11  
12 commonly prescribed medication in patients with resistant hypertension. Electrolyte  
13  
14 changes associated with the BP response are consistent with its mechanism of action of  
15  
16 blocking the mineralocorticoid receptor and decreasing epithelial sodium channel  
17  
18 activity.  
19  
20  
21  
22  
23  
24  
25  
26  
27  
28  
29  
30  
31  
32  
33  
34  
35  
36  
37  
38  
39  
40  
41  
42  
43  
44  
45  
46  
47  
48  
49  
50  
51  
52  
53  
54  
55  
56  
57  
58  
59  
60

## ARTICLE SUMMARY

### Strengths and Limitations of this study:

- This study defined the blood pressure response to spironolactone in a large number of patients with resistant hypertension using the electronic health record. The accuracy of algorithms for the identifying patients with resistant hypertension who were initiated on spironolactone were validated by manual review..
- The availability of clinical electrolyte measurements, in addition to blood pressure measurements, provides data supporting the mechanism of MR antagonism in responders to spironolactone.
- This study provides methodology which can be applied in future pharmacogenetic studies using electronic health records. The algorithm can be adapted for use in other large-scale electronic health record systems with linked genetic data.
- Limitations of this study include the inability to confirm medication adherence, a lack of ambulatory blood pressure measurements, and a lack of some laboratory measures, such as HbA1c and lipids, for the entire population.

**Keywords:** spironolactone; mineralocorticoid receptor antagonist; blood pressure response; resistant hypertension; electronic medical record

## INTRODUCTION

The mineralocorticoid receptor (MR) antagonist spironolactone has been identified as effective add-on therapy for blood pressure (BP) control in patients with resistant hypertension in clinical trials, including the Anglo-Scandinavian Cardiac Outcomes Trial-Blood Pressure Lowering Arm (ASCOT-BPLA) and the Prevention and Treatment of Hypertension with Algorithm Based Therapy-2 (PATHWAY-2).<sup>1-4</sup> In the PATHWAY-2 trial, addition of spironolactone at a dose of 25-50 mg/day to a therapeutic regimen containing an angiotensin-converting enzyme inhibitor (ACEi) or angiotensin receptor blocker (ARB), calcium channel blocker (CCB), and thiazide-like diuretic significantly decreased home systolic blood pressure (SBP) by a mean of 8.7 mmHg.<sup>1</sup> In prior clinical studies the SBP/diastolic blood pressure (DBP) responses to spironolactone have ranged from a mean decrease of 4.6/1.8 mmHg to a mean decrease of 25/12 mmHg.<sup>1-5</sup>

Clinical trials often assess homogenous groups of patients limiting the applicability in a real-world clinical setting. We hypothesized that we could use electronic medical records (EMR) to assess the BP response to the addition of spironolactone in resistant hypertensive patients who were on a stable anti-hypertensive regimen of at least three medications including a thiazide diuretic or dihydropyridine CCB. We used a previously published algorithm for the identification of patients with resistant hypertension.<sup>6</sup> To evaluate the BP response to spironolactone we developed an additional algorithm to identify patients who were prescribed spironolactone during a period of stable medication use from up to six months before the start of spironolactone



1  
2  
3 to six months after. The accuracy of the algorithm was validated by electronic record  
4  
5 review.  
6

7  
8 We collected all outpatient BPs and laboratory measurements during the period of  
9  
10 stable medication use before and after initial spironolactone prescription. We assessed BP  
11  
12 response as a continuous variable and as a dichotomized variable (responders vs non-  
13  
14 responders). We also assessed electrolyte measurements relevant to the mechanism of  
15  
16 action of spironolactone, MR antagonism.  
17  
18  
19  
20  
21  
22  
23  
24  
25  
26  
27  
28  
29  
30  
31  
32  
33  
34  
35  
36  
37  
38  
39  
40  
41  
42  
43  
44  
45  
46  
47  
48  
49  
50  
51  
52  
53  
54  
55  
56  
57  
58  
59  
60

## METHODS

### Electronic Medical Record

We obtained Institutional Review Board approval to access the Vanderbilt University Medical Center (VUMC) Synthetic Derivative (SD). The SD is a de-identified copy of the VUMC EMR with Health Insurance Portability and Accountability Act of 1996 (HIPAA) identifiers removed by established de-identification software as well as custom techniques.<sup>7</sup> The SD contains almost all available clinical data including basic demographics, such as race and sex; text from clinical care notes; laboratory values; inpatient and outpatient medication data; international classification of disease (ICD) and current procedural terminology (CPT) codes; and other diagnostic reports.<sup>7</sup> To date, the SD contains approximately 2.8 million records, approximately one million of which contain detailed longitudinal data.

### Spironolactone Response Algorithm Development

Patients within the SD were identified as having resistant hypertension using a previously published algorithm.<sup>6</sup> Patients were defined as having resistant hypertension if their BP was greater than or equal to 140/90 mmHg, despite concurrent use of three antihypertensives including a thiazide diuretic or dihydropyridine CCB, or if they were taking four or more antihypertensive medications, including a thiazide diuretic or dihydropyridine CCB. Patients with secondary hypertension, chronic kidney disease (CKD) stages four and five, heart failure with reduced ejection fraction less than 35 percent, thyroid and parathyroid disorders, nephrotic syndrome, chronic

1  
2  
3 glomerulonephritis, anomalies of the bulbus cordis, coarctation of the aorta, adrenal gland  
4  
5 neoplasms and disorders (excluding adrenal insufficiencies), chronic pulmonary heart  
6  
7 disease, thyrotoxicosis, disorders of thyrocalcitonin secretion, and obstructive uropathy  
8  
9  
10 were excluded by the resistant hypertension algorithm (**Supplemental Table 2**).

11  
12 All drug exposures to antihypertensive medications including spironolactone were  
13  
14 identified from the SD by electronic-prescribing tools and MedEx.<sup>8</sup> The utility of these  
15  
16 tools for extracting medication data from the EMR has been shown previously.<sup>9, 10</sup> For a  
17  
18 medication exposure to be considered valid at least one of the following identifiers- dose,  
19  
20 route, frequency, or duration- was required.  
21  
22

23  
24 We developed an algorithm to identify patients in the SD who were prescribed  
25  
26 spironolactone and in whom BP was measured within a stable window of time before and  
27  
28 after initiation of spironolactone. Using electronic prescribing tools and MedEx,<sup>8</sup> the  
29  
30 novel start date (NSD) for a spironolactone prescription was determined by the earliest  
31  
32 mention of spironolactone, aldactone, or aldactazide in a patient's record after the patient  
33  
34 met the resistant hypertension case definition. In addition, spironolactone, aldactone, or  
35  
36 aldactazide prescription had to have been listed at least twice, at least one month apart,  
37  
38 during the subsequent six-month period. Patients who were initiated on aldactazide  
39  
40 (aldactone/hydrochlorothiazide combination therapy) were required to have been using a  
41  
42 thiazide diuretic immediately prior to the NSD for aldactazide. Patients who were not  
43  
44 prescribed a thiazide prior to the start of aldactazide were excluded as having been started  
45  
46 on spironolactone and hydrochlorothiazide (HCTZ) concurrently. Use of the MR  
47  
48 antagonist eplerenone was not included in the study as it was prescribed to only 2% of the  
49  
50 resistant hypertensive population.  
51  
52  
53  
54  
55  
56  
57  
58  
59  
60

1  
2  
3 Patients prescribed spironolactone without an outpatient BP measurement in the  
4  
5 six months before or after the NSD were excluded. Patients who were diagnosed with  
6  
7 other indications for spironolactone including heart failure, hepatic cirrhosis,  
8  
9 hyperandrogenism, acne, or polycystic ovarian syndrome within a year of the NSD were  
10  
11 also excluded. Using the algorithm, we identified sliding time windows up to six months  
12  
13 before (baseline) and six months after the NSD (response) when there were no changes to  
14  
15 each patient's prescribed antihypertensive medications, including dose (when available),  
16  
17 the number of medications, and class type (**Figure 1**).

21  
22 Once the baseline and response periods were defined, all outpatient BP  
23  
24 measurements taken during these periods were identified. Any patient without at least  
25  
26 two BP measurements during the baseline and response periods was excluded. The SBP  
27  
28 and DBP responses were calculated as the difference between the mean SBP or DBP in  
29  
30 the stable post-treatment window minus the mean SBP or DBP in the pre-treatment  
31  
32 window (e.g.  $\Delta SBP = \overline{SBP}_{post} - \overline{SBP}_{pre}$ ). Any SBP and DBP responses that were  
33  
34 more than two standard deviations from the mean were reviewed manually to confirm  
35  
36 accuracy.  
37  
38

39  
40 We also defined patients as responders versus non-responders based on a review  
41  
42 of BP responses reported in clinical trials of spironolactone in European (EA) and  
43  
44 African Americans (AA).<sup>1-5</sup> We defined responders as those who had a decrease in mean  
45  
46 SBP of at least five mmHg or a decrease in mean DBP of at least two mmHg,  
47  
48 corresponding to the smallest SBP and DBP responses to spironolactone reported among  
49  
50 the studies reviewed.<sup>5</sup>  
51  
52  
53  
54  
55  
56  
57  
58  
59  
60

1  
2  
3 All patient characteristics, including age, gender, race, body mass index (BMI),  
4 outpatient BP measurements, serum potassium, creatinine, and sodium, high-density  
5 lipoprotein (HDL) cholesterol, low-density lipoprotein (LDL) cholesterol, triglycerides,  
6 glucose, hemoglobin A1C (HbA1c), and history of CKD stage three, ischemic heart  
7 disease (IHD), type two diabetes mellitus (T2DM), and smoking, were extracted from the  
8 SD using a combination of ICD-9 and -10 codes, CPT codes, laboratory measurements,  
9 and natural-language processing (**Supplemental Table 1**). Aldosterone, renin, renin  
10 activity, and aldosterone-renin-ratio (ARR) were not evaluated due to the small numbers  
11 of patients with data. For each patient, age and BMI at NSD or the date closest to NSD  
12 was used. The estimated glomerular filtration rate (eGFR) was calculated using the  
13 Modification of Diet in Renal Disease (MDRD) formula.<sup>11</sup> CKD stage three was defined  
14 as an eGFR  $\geq 30$  mL/min/1.73m<sup>2</sup> and  $\leq 60$  mL/min/1.73m<sup>2</sup> or equivalent ICD-9 or -10  
15 code at any point before NSD. Patient race was administratively assigned in the SD  
16 based on either physician or patient report. Previous work has shown that self-identified  
17 race is highly correlated with genetic ancestry<sup>12, 13</sup> and administratively assigned race in  
18 the VUMC SD is sufficient for genetic association analyses<sup>14</sup> and correlates tightly with  
19 genetic ancestry.<sup>13</sup>

20  
21  
22 After the algorithms were iteratively refined, blinded chart reviews of randomly  
23 chosen, never overlapping, charts were performed to determine algorithm efficacy.  
24 Based on a population size of 17,082, review of 138 charts would allow detection of a  
25 misclassification rate of 10% with a margin of error of 5%. We therefore reviewed 150  
26 charts to determine algorithm efficacy. The review consisted of 75 charts from resistant  
27 hypertensive patients that were included by the algorithm and 75 that were excluded. The

1  
2  
3 algorithm was refined until a negative predictive value (NPV), positive predictive value  
4 (PPV), sensitivity, and specificity greater than 90% was achieved based on the review of  
5  
6 150 charts. The final version of the algorithm will be made available at Phenotype  
7  
8 KnowledgeBase (PheKB).<sup>15</sup>  
9

## 10 11 12 13 14 15 **Statistical Methods**

16  
17 Data are presented as frequencies for categorical variables and mean  $\pm$  standard  
18  
19 deviations for continuous variables. Univariable analysis for binary BP response was  
20  
21 performed using Pearson's chi-squared test for categorical variables and the Wilcoxon  
22  
23 rank-sum test for continuous variables. A multivariable logistic regression model or  
24  
25 multivariable linear regression model was fitted for binary BP response and continuous  
26  
27 BP change on all variables available in more than 70% of the population. Missing values  
28  
29 were not imputed. HDL cholesterol, LDL cholesterol, triglycerides, and HbA1c were  
30  
31 excluded from multivariable regression models due to large amounts of missing values.  
32  
33 The method of complete-case analysis was used and a linear relationship was assumed  
34  
35 for all the continuous variables. All statistical analyses were conducted using the SPSS  
36  
37 software version 24 (SPSS, Chicago, IL, USA) or R 3.3.0.<sup>16</sup>  
38  
39  
40  
41  
42  
43

## 44 45 **Patient and Public Involvement**

46  
47 Because this study involved the use of the VUMC SD, patients were not recruited  
48  
49 and there was no intervention. While patients were not involved in the development of  
50  
51 the specific research question or study design, there has been extensive patient and  
52  
53 community engagement in the establishment of the SD. Further, a community advisory  
54  
55  
56  
57  
58  
59  
60

1  
2  
3  
4  
5  
6  
7  
8  
9  
10  
11  
12  
13  
14  
15  
16  
17  
18  
19  
20  
21  
22  
23  
24  
25  
26  
27  
28  
29  
30  
31  
32  
33  
34  
35  
36  
37  
38  
39  
40  
41  
42  
43  
44  
45  
46  
47  
48  
49  
50  
51  
52  
53  
54  
55  
56  
57  
58  
59  
60

board within the Vanderbilt Institute for Clinical and Translational Research (VICTR) reviews programs including the SD. Dissemination of study results will occur through local reporting of study results.

For peer review only

## RESULTS

### Algorithm validation

NPV, PPV, sensitivity, and specificity of the algorithm for spironolactone response were determined after the blinded review of 150 electronic records. All but one excluded record were excluded appropriately. That record was excluded by the algorithm due to an erroneous ascertainment that a medication other than spironolactone had been added during the response periods. Five of the 75 records included in the algorithm should have been excluded. Four of these patients had inconsistencies in their medication history during the baseline or response period. In another patient, spironolactone was listed as a potential therapy in several notes but was not apparently prescribed. Based on this review, the NPV was 98.7%, PPV was 93.3%, sensitivity was 98.6%, and specificity was 93.7%.

### Identification of spironolactone response population

Among EA and AA patients with resistant hypertension in the SD 3,405 EA and 1,054 AA were prescribed spironolactone. After applying exclusion and inclusion criteria, 1,114 EA patients and 369 AA patients were included in the study for evaluation of spironolactone response, 32.7% and 35.0% of the original number of patients prescribed spironolactone, respectively (**Figure 2**). The median dose of spironolactone was 25 mg and ranged from 5 to 200 mg. The majority of patients included in the study, 1,043 (70.3%), were prescribed 25 mg of spironolactone. The average number of



1  
2  
3 outpatient BPs measured during the baseline and response periods were 4 and 4.8,  
4  
5 respectively.  
6  
7  
8  
9

### 10 **Characteristics of spironolactone responders and non-responders**

11  
12 Defining spironolactone response as a reduction in SBP of at least five mmHg or  
13  
14 in DBP of at least two mmHg, we identified 1,034 responders (69.7%) and 449 non-  
15  
16 responders (30.3%) in the total population. Of the responders, 15.8% met the criteria for a  
17  
18 DBP response, 19.4% for a SBP response, and 64.8% for both a DBP and SBP response.  
19  
20 Patient characteristics appear in **Table 1**. In univariable analyses, patients who  
21  
22 responded to spironolactone were heavier and less likely to have a history of IHD.  
23  
24 Responders had significantly higher baseline SBP, DBP, serum sodium, and HbA1c, and  
25  
26 significantly lower baseline creatinine than nonresponders (**Table 1**). Responders also  
27  
28 had greater decreases in serum sodium and eGFR as well as greater increases in serum  
29  
30 potassium and creatinine after starting spironolactone than nonresponders (**Table 1**).  
31  
32 HbA1c did not change in responders whereas it declined over time in non-responders. In  
33  
34 a multivariable model adjusting for all variables present in at least 1000 patients,  
35  
36 responders were older and heavier, had higher baseline SBP and DBP, had lower baseline  
37  
38 serum potassium and had a greater increase in serum potassium and creatinine after  
39  
40 starting spironolactone than non-responders (**Table 2**).  
41  
42  
43  
44  
45  
46  
47  
48  
49  
50  
51  
52  
53  
54  
55  
56  
57  
58  
59  
60

**Table 1. Characteristics of spironolactone responders and nonresponders in the total population.**

| Variable                     | N    | Nonresponders<br>(n=449) | Responders<br>(n=1,034) | p-value |
|------------------------------|------|--------------------------|-------------------------|---------|
| Age, years                   | 1483 | 63.67 ± 13.18            | 64.28 ± 12.63           | 0.33    |
| Female, n (%)                | 1483 | 215 (47.9%)              | 532 (51.5%)             | 0.21    |
| Black Race, n (%)            | 1483 | 106 (23.6%)              | 263 (25.4%)             | 0.46    |
| BMI, kg/m <sup>2</sup>       | 1358 | 32.2 ± 8.0               | 33.5 ± 8.3              | 0.004   |
| <b>Diagnostic History</b>    |      |                          |                         |         |
| T2DM, n (%)                  | 1483 | 236 (52.6%)              | 566 (54.7%)             | 0.44    |
| CKD3, n (%)                  | 1483 | 163 (36.3%)              | 398 (38.5%)             | 0.43    |
| IHD, n (%)                   | 1483 | 179 (39.9%)              | 351 (33.9%)             | 0.03    |
| Smoking, n (%)               | 1483 | 96 (21.4%)               | 211 (20.4%)             | 0.67    |
| <b>Baseline measurements</b> |      |                          |                         |         |
| SBP, mmHg                    | 1483 | 133.20 ± 17.40           | 147.59 ± 18.70          | < 0.001 |
| DBP, mmHg                    | 1483 | 71.66 ± 11.74            | 79.00 ± 13.08           | < 0.001 |

|    |                                                                        |      |                 |                |         |
|----|------------------------------------------------------------------------|------|-----------------|----------------|---------|
| 1  |                                                                        |      |                 |                |         |
| 2  |                                                                        |      |                 |                |         |
| 3  |                                                                        |      |                 |                |         |
| 4  | Serum sodium, mmol/L                                                   | 1176 | 138.67 ± 3.22   | 139.25 ± 2.98  | 0.004   |
| 5  |                                                                        |      |                 |                |         |
| 6  |                                                                        |      |                 |                |         |
| 7  | Serum potassium,                                                       | 1177 | 3.95 ± 0.47     | 3.91 ± 0.43    | 0.15    |
| 8  |                                                                        |      |                 |                |         |
| 9  |                                                                        |      |                 |                |         |
| 10 | mmol/L                                                                 |      |                 |                |         |
| 11 |                                                                        |      |                 |                |         |
| 12 |                                                                        |      |                 |                |         |
| 13 |                                                                        |      |                 |                |         |
| 14 | Creatinine, mg/dL                                                      | 1184 | 1.12 ± 0.36     | 1.09 ± 0.42    | 0.03    |
| 15 |                                                                        |      |                 |                |         |
| 16 |                                                                        |      |                 |                |         |
| 17 | eGFR, mL/min/1.73m <sup>2</sup>                                        | 1382 | 76.73 ± 23.78   | 77.38 ± 20.95  | 0.51    |
| 18 |                                                                        |      |                 |                |         |
| 19 |                                                                        |      |                 |                |         |
| 20 |                                                                        |      |                 |                |         |
| 21 | Glucose, mg/dL                                                         | 1179 | 125.56 ± 58.56  | 126.98 ± 50.61 | 0.80    |
| 22 |                                                                        |      |                 |                |         |
| 23 |                                                                        |      |                 |                |         |
| 24 | HbA1c, %                                                               | 538  | 6.91 ± 1.81     | 7.23 ± 3.06    | 0.02    |
| 25 |                                                                        |      |                 |                |         |
| 26 |                                                                        |      |                 |                |         |
| 27 |                                                                        |      |                 |                |         |
| 28 | HDL cholesterol, mg/dL                                                 | 575  | 47.48 ± 17.97   | 45.53 ± 15.31  | 0.44    |
| 29 |                                                                        |      |                 |                |         |
| 30 |                                                                        |      |                 |                |         |
| 31 | LDL cholesterol, mg/dL                                                 | 537  | 95.65 ± 39.74   | 98.54 ± 34.72  | 0.41    |
| 32 |                                                                        |      |                 |                |         |
| 33 |                                                                        |      |                 |                |         |
| 34 |                                                                        |      |                 |                |         |
| 35 | Triglycerides, mg/dL                                                   | 578  | 163.98 ± 111.71 | 169.39 ±       | 0.85    |
| 36 |                                                                        |      |                 |                |         |
| 37 |                                                                        |      |                 |                |         |
| 38 |                                                                        |      |                 | 121.20         |         |
| 39 |                                                                        |      |                 |                |         |
| 40 |                                                                        |      |                 |                |         |
| 41 |                                                                        |      |                 |                |         |
| 42 | Difference from baseline following initial spironolactone prescription |      |                 |                |         |
| 43 |                                                                        |      |                 |                |         |
| 44 |                                                                        |      |                 |                |         |
| 45 | Serum sodium, mmol/L                                                   | 1101 | -0.49 ± 2.63    | -0.95 ± 2.70   | 0.006   |
| 46 |                                                                        |      |                 |                |         |
| 47 |                                                                        |      |                 |                |         |
| 48 | Serum potassium,                                                       | 1104 | 0.13 ± 0.48     | 0.25 ± 0.42    | < 0.001 |
| 49 |                                                                        |      |                 |                |         |
| 50 |                                                                        |      |                 |                |         |
| 51 | mmol/L                                                                 |      |                 |                |         |
| 52 |                                                                        |      |                 |                |         |
| 53 |                                                                        |      |                 |                |         |
| 54 |                                                                        |      |                 |                |         |
| 55 |                                                                        |      |                 |                |         |
| 56 |                                                                        |      |                 |                |         |
| 57 |                                                                        |      |                 |                |         |
| 58 |                                                                        |      |                 |                |         |
| 59 |                                                                        |      |                 |                |         |
| 60 |                                                                        |      |                 |                |         |

|    |                                 |      |                 |               |         |
|----|---------------------------------|------|-----------------|---------------|---------|
| 1  |                                 |      |                 |               |         |
| 2  |                                 |      |                 |               |         |
| 3  |                                 |      |                 |               |         |
| 4  | Creatinine, mg/dL               | 1108 | 0.02 ± 0.23     | 0.134 ± 0.30  | < 0.001 |
| 5  |                                 |      |                 |               |         |
| 6  |                                 |      |                 |               |         |
| 7  | eGFR, mL/min/1.73m <sup>2</sup> | 1254 | -5.22 ± 15.73   | -9.09 ± 15.10 | < 0.001 |
| 8  |                                 |      |                 |               |         |
| 9  |                                 |      |                 |               |         |
| 10 |                                 |      |                 |               |         |
| 11 | Glucose, mg/dL                  | 1101 | -0.27 ± 47.82   | -0.37 ± 40.62 | 0.88    |
| 12 |                                 |      |                 |               |         |
| 13 |                                 |      |                 |               |         |
| 14 | HbA1c, %                        | 284  | -0.25 ± 1.23    | 0.02 ± 1.05   | 0.02    |
| 15 |                                 |      |                 |               |         |
| 16 |                                 |      |                 |               |         |
| 17 | HDL cholesterol, mg/dL          | 214  | 0.70 ± 11.51    | -1.36 ± 9.35  | 0.23    |
| 18 |                                 |      |                 |               |         |
| 19 |                                 |      |                 |               |         |
| 20 |                                 |      |                 |               |         |
| 21 | LDL cholesterol, mg/dL          | 197  | -5.74 ± 32.54   | -7.48 ± 34.94 | 0.77    |
| 22 |                                 |      |                 |               |         |
| 23 |                                 |      |                 |               |         |
| 24 | Triglycerides, mg/dL            | 220  | -17.86 ± 107.95 | -19.43 ±      | 0.91    |
| 25 |                                 |      |                 |               |         |
| 26 |                                 |      |                 |               |         |
| 27 |                                 |      |                 |               |         |
| 28 |                                 |      |                 | 107.16        |         |
| 29 |                                 |      |                 |               |         |
| 30 |                                 |      |                 |               |         |

31

32

33 Abbreviations: BMI, body mass index; CKD3, chronic kidney disease stage three; DBP,

34 diastolic blood pressure; eGFR, estimated glomerular filtration rate; HbA1c, hemoglobin

35 A1c; HDL, high-density lipoprotein; IHD, ischemic heart disease; LDL, low-density

36 lipoprotein; N, number of individuals with the specific measure; SBP, systolic blood

37 pressure; T2DM, type 2 diabetes mellitus.

38

39

40

41

42

43

44 Data are presented as mean ± standard deviation for continuous variables and count (%) for

45 categorical variables

46

47

48

49

50

51

52

53

54

55

56

57

58

59

60

**Table 2. Multivariable logistic regression model for responder versus non-responder in the total population without missing data (N=1019).**

|                              | Odds Ratio* | 95% Confidence Interval | p-value |
|------------------------------|-------------|-------------------------|---------|
| Age, years                   | 1.034       | 1.017-1.052             | < 0.001 |
| Gender, Male: Female         | 0.897       | 0.603-1.323             | 0.59    |
| Race, White: Black           | 1.217       | 0.800-1.849             | 0.36    |
| Mean BMI, kg/m <sup>2</sup>  | 1.030       | 1.008-1.054             | 0.01    |
| <b>Diagnostic history</b>    |             |                         |         |
| T2DM, Yes: No                | 1.132       | 0.794-1.615             | 0.49    |
| CKD3, Yes: No                | 0.932       | 0.654-1.330             | 0.70    |
| IHD, Yes: No                 | 1.256       | 0.905-1.749             | 0.18    |
| Smoking, Yes: No             | 1.074       | 0.745-1.559             | 0.71    |
| <b>Baseline measurements</b> |             |                         |         |
| SBP, mmHg                    | 1.034       | 1.023-1.046             | < 0.001 |
| DBP, mmHg                    | 1.043       | 1.025-1.062             | < 0.001 |

|                                                                        |       |             |       |
|------------------------------------------------------------------------|-------|-------------|-------|
| Serum sodium, mmol/L                                                   | 1.013 | 0.957-1.071 | 0.66  |
| Serum potassium, mmol/L                                                | 1.686 | 1.106-2.588 | 0.02  |
| Creatinine, mg/dL                                                      | 1.266 | 0.603-2.995 | 0.57  |
| eGFR, mL/min/1.73m <sup>2</sup>                                        | 1.007 | 0.993-1.021 | 0.32  |
| Glucose, mg/dL                                                         | 0.999 | 0.996-1.003 | 0.80  |
| Difference from baseline following initial spironolactone prescription |       |             |       |
| Serum sodium, mmol/L                                                   | 0.946 | 0.888-1.007 | 0.08  |
| Serum potassium, mmol/L                                                | 1.968 | 1.290-3.030 | 0.002 |
| Creatinine, mg/dL                                                      | 3.570 | 1.610-9.131 | 0.004 |
| eGFR, mL/min/1.73m <sup>2</sup>                                        | 1.001 | 0.987-1.015 | 0.92  |
| Glucose, mg/dL                                                         | 0.997 | 0.992-1.001 | 0.12  |

Abbreviations: BMI, body mass index; CKD 3, chronic kidney disease stage three; DBP, diastolic blood pressure; eGFR, estimated glomerular filtration rate; IHD, ischemic heart disease; N, number of individuals included in the analysis; SBP, systolic blood pressure.

1  
2  
3 \*For continuous variables, the odds ratio reflects the effect of a one-unit increase. For  
4  
5 example, a one mmHg increase in baseline SBP increases the odds ratio for responder  
6  
7 versus non-responder 0.03.  
8  
9  
10  
11  
12  
13  
14  
15  
16  
17  
18  
19  
20  
21  
22  
23  
24  
25  
26  
27  
28  
29  
30  
31  
32  
33  
34  
35  
36  
37  
38  
39  
40  
41  
42  
43  
44  
45  
46  
47  
48  
49  
50  
51  
52  
53  
54  
55  
56  
57  
58  
59  
60

1  
2  
3 Among EA patients, 343 (30.8%) did not respond to spironolactone. EA  
4 responders were heavier and less likely to have IHD. They had higher baseline SBP,  
5 DBP, and serum sodium than nonresponders (**Supplemental Table 3**). EA responders  
6 also had a greater decrease in serum sodium and eGFR and a greater increase in serum  
7 potassium and creatinine after starting spironolactone (**Supplemental Table 3**).  
8  
9

10  
11  
12 Among AA patients, 106 (28.7%) did not respond to spironolactone. Like EA  
13 responders, AA responders had significantly higher baseline SBP and DBP and a greater  
14 decrease in serum sodium and increase in creatinine after starting spironolactone than  
15 nonresponders (**Supplemental Table 4**).  
16  
17  
18  
19  
20  
21  
22  
23  
24  
25

### 26 **Blood pressure response to spironolactone as a continuous variable**

27  
28 For the entire group, the mean decrease in SBP following initiation of  
29 spironolactone was 8.1 mmHg and the mean decrease in DBP was 3.4 mmHg following  
30 initial spironolactone prescription. Analyses of BP change as a continuous variable were  
31 performed using a multivariable model that included all variables except for HbA1c,  
32 HDL cholesterol, LDL cholesterol, and triglycerides, as data were not available in the  
33 majority of patients.  
34  
35  
36  
37  
38  
39  
40  
41

42 In the total population, patients with higher baseline SBP, lower baseline  
43 creatinine, and a greater decrease in serum sodium, increase in serum potassium, or  
44 increase in creatinine after starting spironolactone had greater reductions in SBP (**Table 3**  
45 and **Figure 3**). Patients with higher baseline SBP and DBP and a greater decrease in  
46 serum sodium, increase in serum potassium, or increase in creatinine after spironolactone  
47  
48  
49  
50  
51  
52  
53  
54  
55  
56  
57  
58  
59  
60



1  
2  
3  
4  
5  
6  
7  
8  
9  
10  
11  
12  
13  
14  
15  
16  
17  
18  
19  
20  
21  
22  
23  
24  
25  
26  
27  
28  
29  
30  
31  
32  
33  
34  
35  
36  
37  
38  
39  
40  
41  
42  
43  
44  
45  
46  
47  
48  
49  
50  
51  
52  
53  
54  
55  
56  
57  
58  
59  
60

had greater reductions in DBP (**Table 3**). Older patients and female patients also had significantly greater reductions in DBP (**Table 3**).

For peer review only

**Table 3. Significant coefficients in multivariable models for change in systolic and diastolic blood pressures.**

|                                  | Associated Variable          | Coefficient<br>t | 95% Confidence Interval | p-value |
|----------------------------------|------------------------------|------------------|-------------------------|---------|
| <b>Total population (N=1019)</b> |                              |                  |                         |         |
| Change in<br>SBP                 | Baseline SBP                 | -0.415           | -0.475, -0.356          | < 0.001 |
|                                  | Baseline creatinine          | 3.628            | 0.202, 7.054            | 0.04    |
|                                  | Change in serum<br>sodium    | 0.701            | 0.338, 1.064            | < 0.001 |
|                                  | Change in serum<br>potassium | -3.483           | -5.834, -1.131          | 0.004   |
|                                  | Change in creatinine         | -5.039           | -8.704, -1.374          | 0.01    |
| Change in<br>DBP                 | Age                          | -0.141           | -0.196, -0.086          | < 0.001 |
|                                  | Gender- Male: Female         | 1.390            | 0.170, 2.610            | 0.03    |

|    |           |                                   |        |                |
|----|-----------|-----------------------------------|--------|----------------|
| 1  |           |                                   |        |                |
| 2  |           |                                   |        |                |
| 3  |           | Baseline SBP                      | -0.045 | -0.080, -0.011 |
| 4  |           |                                   |        | 0.01           |
| 5  |           |                                   |        |                |
| 6  |           | Baseline DBP                      | -0.379 | -0.436, -0.321 |
| 7  |           |                                   |        | < 0.001        |
| 8  |           |                                   |        |                |
| 9  |           |                                   |        |                |
| 10 |           | Change in serum                   | 0.274  | 0.063, 0.485   |
| 11 |           |                                   |        | 0.01           |
| 12 |           |                                   |        |                |
| 13 |           | sodium                            |        |                |
| 14 |           |                                   |        |                |
| 15 |           | Change in serum                   | -2.042 | -3.413, -0.671 |
| 16 |           |                                   |        | 0.004          |
| 17 |           |                                   |        |                |
| 18 |           | potassium                         |        |                |
| 19 |           |                                   |        |                |
| 20 |           | Change in creatinine              | -3.979 | -6.116, -1.841 |
| 21 |           |                                   |        | < 0.001        |
| 22 |           |                                   |        |                |
| 23 |           |                                   |        |                |
| 24 |           |                                   |        |                |
| 25 |           |                                   |        |                |
| 26 |           |                                   |        |                |
| 27 |           |                                   |        |                |
| 28 |           | <b>European Americans (N=753)</b> |        |                |
| 29 |           |                                   |        |                |
| 30 |           |                                   |        |                |
| 31 | Change in | Baseline SBP                      | -0.401 | -0.470, -0.333 |
| 32 |           |                                   |        | < 0.001        |
| 33 |           |                                   |        |                |
| 34 |           |                                   |        |                |
| 35 | SBP       |                                   |        |                |
| 36 |           |                                   |        |                |
| 37 |           |                                   |        |                |
| 38 |           | Change in serum                   | 0.525  | 0.117, 0.933   |
| 39 |           |                                   |        | 0.01           |
| 40 |           |                                   |        |                |
| 41 |           | sodium                            |        |                |
| 42 |           |                                   |        |                |
| 43 |           |                                   |        |                |
| 44 |           |                                   |        |                |
| 45 |           | Change in serum                   | -3.074 | -5.766, -0.381 |
| 46 |           |                                   |        | 0.03           |
| 47 |           |                                   |        |                |
| 48 |           | potassium                         |        |                |
| 49 |           |                                   |        |                |
| 50 |           |                                   |        |                |
| 51 |           |                                   |        |                |
| 52 |           | Change in glucose                 | 0.031  | 0.003, 0.059   |
| 53 |           |                                   |        | 0.03           |
| 54 |           |                                   |        |                |
| 55 |           |                                   |        |                |
| 56 |           |                                   |        |                |
| 57 |           |                                   |        |                |
| 58 |           |                                   |        |                |
| 59 |           |                                   |        |                |
| 60 |           |                                   |        |                |

|    |           |                                  |        |                 |         |
|----|-----------|----------------------------------|--------|-----------------|---------|
| 1  |           |                                  |        |                 |         |
| 2  |           |                                  |        |                 |         |
| 3  |           |                                  |        |                 |         |
| 4  | Change in | Age                              | -0.135 | -0.200, -0.070  | < 0.001 |
| 5  |           |                                  |        |                 |         |
| 6  |           |                                  |        |                 |         |
| 7  | DBP       |                                  |        |                 |         |
| 8  |           |                                  |        |                 |         |
| 9  |           |                                  |        |                 |         |
| 10 |           | Gender, Male: Female             | 1.669  | 0.230, 3.108    | 0.02    |
| 11 |           |                                  |        |                 |         |
| 12 |           |                                  |        |                 |         |
| 13 |           | Baseline SBP                     | -0.045 | -0.084, -0.005  | 0.03    |
| 14 |           |                                  |        |                 |         |
| 15 |           | Baseline DBP                     | -0.370 | -0.436, -0.303  | < 0.001 |
| 16 |           |                                  |        |                 |         |
| 17 |           | Change in serum                  | -1.809 | -3.385, -0.232  | 0.03    |
| 18 |           |                                  |        |                 |         |
| 19 |           | potassium                        |        |                 |         |
| 20 |           |                                  |        |                 |         |
| 21 |           | Change in creatinine             | -3.328 | -5.772, -0.884  | 0.01    |
| 22 |           |                                  |        |                 |         |
| 23 |           |                                  |        |                 |         |
| 24 |           |                                  |        |                 |         |
| 25 |           |                                  |        |                 |         |
| 26 |           |                                  |        |                 |         |
| 27 |           |                                  |        |                 |         |
| 28 |           |                                  |        |                 |         |
| 29 |           |                                  |        |                 |         |
| 30 |           |                                  |        |                 |         |
| 31 |           | <b>African Americans (N=266)</b> |        |                 |         |
| 32 |           |                                  |        |                 |         |
| 33 |           |                                  |        |                 |         |
| 34 |           |                                  |        |                 |         |
| 35 | Change in | Baseline SBP                     | -0.445 | -0.571, -0.319  | < 0.001 |
| 36 |           |                                  |        |                 |         |
| 37 |           |                                  |        |                 |         |
| 38 | SBP       |                                  |        |                 |         |
| 39 |           |                                  |        |                 |         |
| 40 |           |                                  |        |                 |         |
| 41 |           | Baseline creatinine              | 5.572  | 0.017, 11.127   | 0.05    |
| 42 |           |                                  |        |                 |         |
| 43 |           | Change in serum                  | 1.338  | 0.517, 2.159    | 0.002   |
| 44 |           |                                  |        |                 |         |
| 45 |           | sodium                           |        |                 |         |
| 46 |           |                                  |        |                 |         |
| 47 |           |                                  |        |                 |         |
| 48 |           | Change in potassium              | -5.206 | -10.205, -0.207 | 0.04    |
| 49 |           |                                  |        |                 |         |
| 50 |           |                                  |        |                 |         |
| 51 |           |                                  |        |                 |         |
| 52 |           |                                  |        |                 |         |
| 53 |           |                                  |        |                 |         |
| 54 |           |                                  |        |                 |         |
| 55 |           |                                  |        |                 |         |
| 56 |           |                                  |        |                 |         |
| 57 |           |                                  |        |                 |         |
| 58 |           |                                  |        |                 |         |
| 59 |           |                                  |        |                 |         |
| 60 |           |                                  |        |                 |         |

|           |                      |         |                 |         |
|-----------|----------------------|---------|-----------------|---------|
|           | Change in creatinine | -10.923 | -19.456, -2.391 | 0.01    |
| Change in | Age                  | -0.156  | -0.265, -0.046  | 0.01    |
| DBP       |                      |         |                 |         |
|           | Baseline DBP         | -0.407  | -0.512, -0.278  | < 0.001 |
|           | Change in sodium     | 0.530   | 0.053-1.007     | 0.03    |
|           | Change in potassium  | -2.864  | -5.768, 0.039   | 0.05    |
|           | Change in creatinine | -7.370  | -12.326, -2.413 | 0.004   |

Abbreviations: DBP, diastolic blood pressure; N, number of individuals included in the analysis; SBP, systolic blood pressure.

1  
2  
3 In EA alone, a greater decrease in either SBP or DBP was significantly associated  
4 with baseline SBP, as well as increase in serum potassium (**Table 3**). A greater  
5  
6 reductions in SBP was further associated with greater decreases in serum sodium and  
7  
8 glucose (**Table 3**). The change in DBP was also significantly associated with age, sex,  
9  
10 and creatinine (**Table 3**).  
11  
12  
13

14  
15 In AA, greater reductions in SBP and DBP were significantly associated with  
16  
17 greater decreases in serum sodium and increases in serum potassium and creatinine  
18  
19 (**Table 3**). Patients with higher baseline SBP and baseline creatinine had a greater  
20  
21 reduction in SBP, while patients with higher baseline DBP and older age had a greater  
22  
23 reduction in DBP (**Table 3**).  
24  
25  
26  
27  
28  
29  
30  
31  
32  
33  
34  
35  
36  
37  
38  
39  
40  
41  
42  
43  
44  
45  
46  
47  
48  
49  
50  
51  
52  
53  
54  
55  
56  
57  
58  
59  
60

## DISCUSSION

We developed a highly accurate algorithm to define the BP response to spironolactone in patients with resistant hypertension using the EMR. The mean decreases in SBP and DBP for the total study population, 8.1 mmHg and 3.4 mmHg, respectively, are consistent with responses reported in prior clinical trials, such as the PATHWAY-2 trial.<sup>1</sup> In total, 30.3% of patients prescribed spironolactone did not achieve a five mmHg decrease in SBP or two mmHg decrease in DBP in the six months following spironolactone initiation. Higher pretreatment SBP and DBP predicted a greater therapeutic response to spironolactone, measured either as a dichotomous or continuous variable. Response to spironolactone was associated with a greater decrease in serum sodium and greater increase in serum potassium, consistent with effective MR blockade.

By blocking the MR, spironolactone inhibits the aldosterone-stimulated increase in serum and glucocorticoid receptor kinase (SGK1) expression. This results in a decrease in the phosphorylation of neural precursor cell-expressed

1  
2  
3  
4 developmentally downregulated (gene 4) protein (NEDD4-2) resulting in NEDD4-  
5  
6  
7 2-dependent downregulation of the epithelial sodium channel (ENaC). We found  
8  
9  
10 that BP decrease after spironolactone correlated significantly with an increase in  
11  
12  
13 serum sodium and a decrease in serum potassium, consistent with a decrease in  
14  
15  
16 ENaC activity. These results suggest that individuals exhibiting smaller  
17  
18  
19 decreases in BP may have relatively increased residual ENaC activity during  
20  
21  
22 spironolactone. In the present study, we are unable to determine if this  
23  
24  
25 inadequate BP response is due to inadequate spironolactone dose,  
26  
27  
28 spironolactone noncompliance, or non-MR mediated ENaC activation.  
29  
30  
31  
32  
33  
34

35 We found a significant correlation between decreasing BP and increasing  
36  
37  
38 creatinine after starting spironolactone in all groups. An increase in creatinine  
39  
40  
41 can result from hemodynamic effects of BP medications and especially from  
42  
43  
44 blocking the renin-angiotensin-aldosterone system (RAAS).<sup>1</sup> Clinical trials of  
45  
46  
47 ACEis and ARBs also demonstrate an initial decrease in eGFR or increase in  
48  
49  
50 serum creatinine with RAAS blockade even as these drugs slow the rate of renal  
51  
52  
53 decline.<sup>17, 18</sup> Nevertheless National Kidney Foundations-Kidney Disease  
54  
55  
56  
57  
58  
59  
60



1  
2  
3 Outcomes Quality Initiative (NKF-KDOQI) guidelines, recommend decreasing  
4  
5  
6  
7 ACEi and ARB dose and monitoring eGFR frequently in patients in whom serum  
8  
9  
10 creatinine increases more than 30% after initiation of one of these drugs.<sup>19</sup>  
11  
12  
13  
14 Similar conservative measures may be warranted in patients in whom creatinine  
15  
16  
17 increases significantly after initiation of spironolactone.  
18  
19  
20

21 In the present study, we also observed a significant correlation between  
22  
23  
24 the SBP response and decreasing glucose in EA, whereas among those in whom  
25  
26  
27 it was measured before and after therapy, HbA1c declined in nonresponders but  
28  
29  
30 not responders. The latter observation may reflect the fact that responders had a  
31  
32  
33  
34 higher baseline HbA1c than non-responders. The impact of spironolactone on  
35  
36  
37  
38 glucose homeostasis is of particular interest in patients with resistant  
39  
40  
41  
42 hypertension because T2DM is a common comorbidity. In fact, in our study  
43  
44  
45  
46 population, 566 patients (56%) had a history of T2DM prior to the initiation of  
47  
48  
49  
50 spironolactone. The potential for spironolactone to improve glucose is supported  
51  
52  
53  
54  
55  
56  
57  
58  
59 improvement in glucose levels after initiation of spironolactone *in vivo*.<sup>20</sup> Further,  
60

1  
2  
3 in another rodent study investigating the role of low-dose spironolactone on  
4  
5  
6  
7 oxidative stress and insulin-stimulated glucose transport spironolactone  
8  
9  
10 treatment significantly improved in insulin signaling and insulin-stimulated  
11  
12  
13  
14 glucose uptake in skeletal muscle.<sup>21</sup>  
15  
16

17 While these findings may suggest a potential benefit to glucose  
18  
19  
20 management from MR antagonism it is important to note that the exact  
21  
22  
23 relationship between MR antagonism and glucose is not perfectly understood.  
24  
25  
26  
27  
28 Contrary to the aforementioned murine studies and our results, clinical trials in  
29  
30  
31 patients with T2DM and heart failure have reported increases in glucose and  
32  
33  
34 HbA1c after starting spironolactone.<sup>2, 22</sup> One potential explanation for the  
35  
36  
37  
38 inconsistency between the observed relationship between BP response and  
39  
40  
41  
42 change in SBP in EA patients and those reported in previous clinical trials is that  
43  
44  
45 clinical glucose measurements are often not made while patients are fasting.  
46  
47  
48  
49 Because glucose management is an important aspect of health in the majority of  
50  
51  
52 patients with resistant hypertension and because our findings, as well as others,  
53  
54  
55  
56  
57  
58  
59  
60

1  
2  
3 suggest an association between spironolactone use and glucose levels additional  
4  
5  
6  
7 studies to better characterize this relationship are warranted.  
8  
9

10 A lack of BP response to spironolactone in some patients could result from  
11  
12 non-adherence. A limitation of this study and many other studies of resistant  
13  
14 hypertension is the inability to measure adherence directly in the patients  
15  
16  
17 prescribed spironolactone without measuring drug levels, which is not routinely  
18  
19  
20 done in clinical practice. Nonadherence alone does not likely explain the lack of  
21  
22  
23 BP response in nonresponders, however. First, patients nonadherent to  
24  
25  
26 spironolactone would likely be nonadherent to other medications. Nonadherent  
27  
28  
29 patients, therefore, would be expected to have higher baseline BPs than  
30  
31  
32 adherent patients. To the contrary, we found that nonresponders had lower  
33  
34  
35 baseline SBP and DBP than responders and baseline SBP and DBP significantly  
36  
37  
38 predicted BP response. In addition, initiation of spironolactone resulted in an  
39  
40  
41 increase in serum potassium and decrease in serum sodium in non-responders  
42  
43  
44 as well as responders, albeit to a lesser degree. Taken together these findings  
45  
46  
47  
48  
49  
50  
51  
52  
53  
54  
55  
56  
57  
58  
59  
60

1  
2  
3 suggest that nonadherence is not the predominant driver of the lack of BP  
4  
5  
6  
7 response in non-responders.  
8  
9

10 Another way to assess adequacy of spironolactone dose is to assess  
11  
12 whether renin activity remains suppressed. Unfortunately, an insufficient number  
13  
14 of patients had renin measured during the baseline and response periods to  
15  
16 assess change in renin concentration or activity. The limited number of renin  
17  
18 measurements in the EMR is reflective of poor screening rates for primary  
19  
20 aldosteronism.<sup>23</sup> Previous studies have reported limited value in the addition of  
21  
22 aldosterone levels or the ARR to prediction models of BP response to MR  
23  
24 antagonism in resistant hypertension, however.<sup>24, 25</sup>  
25  
26  
27  
28  
29  
30  
31  
32  
33  
34  
35  
36  
37

38 Other limitations of the study include the exclusion of a significant number  
39  
40 of patients with resistant hypertension due to inadequate documentation of pre-  
41  
42 and post-treatment BPs. The relatively small number of AA limits the power to  
43  
44 detect predictors of response to spironolactone in this group.  
45  
46  
47  
48  
49  
50

51 In conclusion, we have developed a highly accurate algorithm for the assessment  
52  
53 of BP response to spironolactone, a commonly prescribed medication, in patients with  
54  
55  
56  
57  
58  
59

1  
2  
3 resistant hypertension using EMR. Electrolyte changes associated with the BP response  
4  
5 to spironolactone are consistent with its mechanism of action to block the MR and  
6  
7 decrease activity of ENaC. The finding that the response to spironolactone correlated  
8  
9 with a decrease in glucose in EA could be consistent with a beneficial effect of  
10  
11 spironolactone on insulin sensitivity or insulin secretory capacity.  
12  
13  
14  
15  
16  
17  
18  
19  
20  
21  
22  
23  
24  
25  
26  
27  
28  
29  
30  
31  
32  
33  
34  
35  
36  
37  
38  
39  
40  
41  
42  
43  
44  
45  
46  
47  
48  
49  
50  
51  
52  
53  
54  
55  
56  
57  
58  
59  
60

1  
2  
3 **ACKNOWLEDGEMENTS**  
4  
5

6 None  
7  
8  
9  
10  
11  
12  
13  
14  
15  
16  
17  
18  
19  
20  
21  
22  
23  
24  
25  
26  
27  
28  
29  
30  
31  
32  
33  
34  
35  
36  
37  
38  
39  
40  
41  
42  
43  
44  
45  
46  
47  
48  
49  
50  
51  
52  
53  
54  
55  
56  
57  
58  
59  
60

For peer review only

## SOURCES OF FUNDING

This study was supported by the National Institutes of Health (DK108444-01A1). The dataset used for the analyses described were obtained from the Vanderbilt University Medical Center Synthetic Derivative, which is supported by institutional funding, the 1S10RR025141-01 instrumentation award, and by the CTSA grant UL1TR000445 from National Center for Advancing Translational Sciences/National Institutes of Health.

1  
2  
3 **DISCLOSURES**  
4  
5  
6  
7

8 None  
9  
10  
11  
12  
13  
14  
15  
16  
17  
18  
19  
20  
21  
22  
23  
24  
25  
26  
27  
28  
29  
30  
31  
32  
33  
34  
35  
36  
37  
38  
39  
40  
41  
42  
43  
44  
45  
46  
47  
48  
49  
50  
51  
52  
53  
54  
55  
56  
57  
58  
59  
60

For peer review only



## REFERENCES

1. Williams B, MacDonald TM, Morant S, Webb DJ, Sever P, McInnes G, Ford I, Cruickshank JK, Caulfield MJ, Salsbury J, Mackenzie I, Padmanabhan S, Brown MJ, British Hypertension Society's PSG. Spironolactone versus placebo, bisoprolol, and doxazosin to determine the optimal treatment for drug-resistant hypertension (PATHWAY-2): A randomised, double-blind, crossover trial. *Lancet*. 2015;386:2059-2068. doi:10.1016/S0140-6736(15)00257-3
2. Chapman N, Dobson J, Wilson S, Dahlof B, Sever PS, Wedel H, Poulter NR, Anglo-Scandinavian Cardiac Outcomes Trial I. Effect of spironolactone on blood pressure in subjects with resistant hypertension. *Hypertension*. 2007;49:839-845. doi:10.1161/01.HYP.0000259805.18468.8c
3. de Souza F, Muxfeldt E, Fiszman R, Salles G. Efficacy of spironolactone therapy in patients with true resistant hypertension. *Hypertension*. 2010;55:147-152. doi:10.1161/HYPERTENSIONAHA.109.140988
4. Nishizaka MK, Zaman MA, Calhoun DA. Efficacy of low-dose spironolactone in subjects with resistant hypertension. *Am J Hypertens*. 2003;16:925-930.
5. Saha C, Eckert GJ, Ambrosius WT, Chun TY, Wagner MA, Zhao Q, Pratt JH. Improvement in blood pressure with inhibition of the epithelial sodium channel in blacks with hypertension. *Hypertension*. 2005;46:481-487. doi:10.1161/01.HYP.0000179582.42830.1d
6. Shuey MM, Gandelman JS, Chung CP, Nian H, Yu C, Denny JC, Brown NJ. Characteristics and treatment of African-American and European-American

- 1  
2  
3 patients with resistant hypertension identified using the electronic health record in  
4 an academic health centre: A case-control study. *BMJ Open*.  
5  
6 2018;0doi:10.1136/bmjopen-2018-021640  
7  
8  
9
- 10 7. Roden DM, Pulley JM, Basford MA, Bernard GR, Clayton EW, Balser JR, Masys  
11 DR. Development of a large-scale de-identified DNA biobank to enable  
12 personalized medicine. *Clin Pharmacol Ther*. 2008;84:362-369.  
13  
14 doi:10.1038/clpt.2008.89  
15  
16
- 17 8. Stenner SP, Doan S, Johnson KB, Waitman LA, Denny JC. Medex: A medication  
18 information extraction system for clinical narratives. *J Am Med Inform Assoc*.  
19 2010;17:19-24.  
20  
21  
22
- 23 9. Xu H, Doan S, Birdwell KA, Cowan JD, Vincz AJ, Haas DW, Basford MA,  
24 Denny JC. An automated approach to calculating the daily dose of tacrolimus in  
25 electronic health records. *AMIA Jt Summits Transl Sci Proc*. 2010;2010:71-75.  
26  
27  
28
- 29 10. Xu H, Jiang M, Oetjens M, Bowton EA, Ramirez AH, Jeff JM, Basford MA,  
30 Pulley JM, Cowan JD, Wang X, Ritchie MD, Masys DR, Roden DM, Crawford  
31 DC, Denny JC. Facilitating pharmacogenetic studies using electronic health  
32 records and natural-language processing: A case study of warfarin. *J Am Med  
33 Inform Assoc*. 2011;18:387-391. doi:10.1136/amiajnl-2011-000208  
34  
35  
36  
37  
38  
39
- 40 11. Levey AS, Bosch JP, Lewis JB, Greene T, Rogers N, Roth D. A more accurate  
41 method to estimate glomerular filtration rate from serum creatinine: A new  
42 prediction equation. Modification of diet in renal disease study group. *Ann Intern  
43 Med*. 1999;130:461-470.  
44  
45  
46  
47  
48  
49  
50  
51  
52  
53  
54  
55  
56  
57  
58  
59  
60

- 1  
2  
3 12. Tang H, Quertermous T, Rodriguez B, Kardia SL, Zhu X, Brown A, Pankow JS,  
4 Province MA, Hunt SC, Boerwinkle E, Schork NJ, Risch NJ. Genetic structure,  
5 self-identified race/ethnicity, and confounding in case-control association studies.  
6  
7  
8  
9  
10 *Am J Hum Genet.* 2005;76:268-275. doi:10.1086/427888  
11
- 12 13. Dumitrescu L, Ritchie MD, Brown-Gentry K, Pulley JM, Basford M, Denny JC,  
13 Oksenberg JR, Roden DM, Haines JL, Crawford DC. Assessing the accuracy of  
14 observer-reported ancestry in a biorepository linked to electronic medical records.  
15  
16  
17  
18  
19 *Genet Med.* 2010;12:648-650. doi:10.1097/GIM.0b013e3181efe2df  
20
- 21 14. Birdwell KA, Grady B, Choi L, Xu H, Bian A, Denny JC, Jiang M, Vranic G,  
22 Basford M, Cowan JD, Richardson DM, Robinson MP, Ikizler TA, Ritchie MD,  
23 Stein CM, Haas DW. The use of a DNA biobank linked to electronic medical  
24 records to characterize pharmacogenomic predictors of tacrolimus dose  
25 requirement in kidney transplant recipients. *Pharmacogenet Genomics.*  
26  
27  
28  
29  
30  
31  
32  
33 2012;22:32-42. doi:10.1097/FPC.0b013e32834e1641  
34
- 35 15. Speltz P, Rasmussen LV, Basford M, Gottesman O, Peissig PL, Pacheco JA,  
36 Tromp G, Pathak J, Carrell DS, Ellis SB, Lingren T, Thompson WK, Savova G,  
37 Haines J, Roden DM, Harris PA, Denny JC. Phekb: A catalog and workflow for  
38 creating electronic phenotype algorithms for transportability. *J Am Med Inform*  
39  
40  
41  
42  
43  
44  
45 2016;23:1046-1052.  
46
- 47 16. Team RC. R: A language and environment for statistical computing [internet].  
48  
49  
50  
51  
52  
53  
54  
55  
56  
57  
58  
59  
60

- 1  
2  
3 17. Bakris GL, Weir MR. Angiotensin-converting enzyme inhibitor-associated  
4 elevations in serum creatinine: Is this a cause for concern? *Arch Intern Med.*  
5  
6 2000;160:685-693.  
7  
8  
9  
10 18. Hansen HP, Rossing P, Tarnow L, Nielsen FS, Jensen BR, Parving HH. Increased  
11 glomerular filtration rate after withdrawal of long-term antihypertensive treatment  
12 in diabetic nephropathy. *Kidney Int.* 1995;47:1726-1731.  
13  
14  
15 19. Kidney Disease Outcomes Quality I. K/doqi clinical practice guidelines on  
16 hypertension and antihypertensive agents in chronic kidney disease. *Am J Kidney*  
17 *Dis.* 2004;43:S1-290.  
18  
19  
20 20. Wada T, Kenmochi H, Miyashita Y, Sasaki M, Ojima M, Sasahara M, Koya D,  
21 Tsuneki H, Sasaoka T. Spironolactone improves glucose and lipid metabolism by  
22 ameliorating hepatic steatosis and inflammation and suppressing enhanced  
23 gluconeogenesis induced by high-fat and high-fructose diet. *Endocrinology.*  
24 2010;151:2040-2049. doi:10.1210/en.2009-0869  
25  
26  
27 21. Lastra G, Whaley-Connell A, Manrique C, Habibi J, Gutweiler AA, Appesh L,  
28 Hayden MR, Wei Y, Ferrario C, Sowers JR. Low-dose spironolactone reduces  
29 reactive oxygen species generation and improves insulin-stimulated glucose  
30 transport in skeletal muscle in the tg(mren2)27 rat. *Am J Physiol Endocrinol*  
31 *Metab.* 2008;295:E110-116. doi:10.1152/ajpendo.00258.2007  
32  
33  
34  
35 22. Yamaji M, Tsutamoto T, Kawahara C, Nishiyama K, Yamamoto T, Fujii M,  
36 Horie M. Effect of eplerenone versus spironolactone on cortisol and hemoglobin  
37 a(1)(c) levels in patients with chronic heart failure. *Am Heart J.* 2010;160:915-  
38 921. doi:10.1016/j.ahj.2010.04.024  
39  
40  
41  
42  
43  
44  
45  
46  
47  
48  
49  
50  
51  
52  
53  
54  
55  
56  
57  
58  
59  
60

- 1  
2  
3 23. Ruhle BC, White MG, Alsafran S, Kaplan EL, Angelos P, Grogan RH. Keeping  
4 primary aldosteronism in mind: Deficiencies in screening at-risk hypertensives.  
5  
6 *Surgery*. 2019;165:221-227. doi:10.1016/j.surg.2018.05.085  
7  
8  
9  
10 24. Parthasarathy HK, Alhashmi K, McMahon AD, Struthers AD, McInnes GT, Ford  
11 I, Connell JM, MacDonald TM. Does the ratio of serum aldosterone to plasma  
12 renin activity predict the efficacy of diuretics in hypertension? Results of  
13 RENALDO. *J Hypertens*. 2010;28:170-177.  
14  
15 doi:10.1097/HJH.0b013e328332b79b  
16  
17  
18  
19 25. Vaclavik J, Sedlak R, Jarkovsky J, Kocianova E, Taborsky M. Effect of  
20 spironolactone in resistant arterial hypertension: A randomized, double-blind,  
21 placebo-controlled trial (ASPIRANT-EXT). *Medicine (Baltimore)*.  
22  
23 2014;93:e162. doi:10.1097/MD.0000000000000162  
24  
25  
26  
27  
28  
29  
30  
31  
32  
33  
34  
35  
36  
37  
38  
39  
40  
41  
42  
43  
44  
45  
46  
47  
48  
49  
50  
51  
52  
53  
54  
55  
56  
57  
58  
59  
60

## FIGURE LEGENDS

**Figure 1. Schematic of the spironolactone response algorithm and identification of the baseline and response periods for patients.** The earliest date a patient was prescribed spironolactone is indicated by the novel start date (NSD). The baseline period is determined by identifying all visits in which same three medication classes as prescribed to the patient as on the NSD. If the visit date for the start of the baseline period occurred more than six months before the NSD a baseline period of six months was used. The determination of the response period is not shown in the schematic above. Similar logic was applied to the selection of this period.

**Figure 2. Diagram of the algorithm for the identification of patients with resistant hypertension in the VUMC Synthetic Derivative (SD) prescribed spironolactone during a period of stable medication use for the evaluation of blood pressure response.**

1  
2  
3  
4 **Figure 3. The significant correlations with systolic blood pressure change in the**  
5  
6  
7 **total population.** Correlation between the change in systolic blood pressure (SBP)  
8  
9  
10 after starting spironolactone and baseline A) SBP [correlation coefficient (CC)= -  
11  
12  
13 0.415,  $p < 0.001$ ], and the change in B) creatinine (CC= -5.039,  $p = 0.01$ ), C) serum  
14  
15 sodium (CC= 0.701,  $p < 0.001$ ), and D) serum potassium (CC= -3.483,  $p = 0.004$ ).  
16  
17  
18  
19  
20  
21  
22  
23  
24  
25  
26  
27  
28  
29  
30  
31  
32  
33  
34  
35  
36  
37  
38  
39  
40  
41  
42  
43  
44  
45  
46  
47  
48  
49  
50  
51  
52  
53  
54  
55  
56  
57  
58  
59  
60

## AUTHOR STATEMENT

### Contributorship

MMS and NJB contributed to the design of the study; MMS, BP, HN, CY,

JML,

and NJB contributed to the analysis and interpretation of the results; MMS

and

NJB contributed to the drafting of the manuscript; MMS, BP, HN, CY,

JML, and NJB contributed to the editing of the manuscript and final

approval for

submission

### Competing Interests

All authors have completed the ICMJE uniform disclosure form at

[www.icmje.org/coi\\_disclosure.pdf](http://www.icmje.org/coi_disclosure.pdf) and declare: Dr Brown reports consulting for

Shire HGT, Novartis Pharmaceuticals, Viamet Pharmaceuticals and serving on



1  
2  
3 the Scientific Advisory Board of Alnylam Pharmaceuticals. Dr. Brown also sits on  
4  
5  
6  
7 the Joint Scientific Committee for the Vanderbilt Bayer Alliance. All authors report  
8  
9  
10 no support from any organization for the submitted work; no financial  
11  
12  
13 relationships with any organizations that might have an interest in the submitted  
14  
15  
16  
17 work in the previous three years; no other relationships or activities that could  
18  
19  
20  
21 appear to have influenced the submitted work.  
22  
23  
24  
25  
26  
27

### 28 **Patient Consent**

29  
30  
31 No identifiable patient data was used in the study.  
32  
33  
34  
35  
36  
37

### 38 **Ethical Approval**

39  
40  
41  
42 The study was approved by the Vanderbilt University Medical Center Institutional  
43  
44  
45 Review Board (#130848).  
46  
47  
48  
49  
50  
51

### 52 **Transparency Declaration**

1  
2  
3 M. Shuey affirms that the manuscript is an honest, accurate, and transparent

4  
5  
6  
7 account of

8  
9  
10 the study being reported; that no important aspects of the study have been

11  
12  
13  
14 omitted; and

15  
16  
17 that any discrepancies from the study as planned (and, if relevant, registered)

18  
19  
20  
21 have been

22  
23  
24 explained.

## 25 26 27 28 29 30 31 **Data Sharing**

32  
33  
34  
35 The full data set is available upon request to the corresponding author.  
36  
37  
38  
39  
40  
41  
42  
43  
44  
45  
46  
47  
48  
49  
50  
51  
52  
53  
54  
55  
56  
57  
58  
59  
60

## WHAT THIS PAPER ADDS

### What is already known on this subject

Patients with resistant hypertension represent a subset of hypertensive patients with difficult to control hypertension despite adequate medication prescription.

Spirolactone, a MR antagonist, has been identified by numerous clinical trials as the preferred add-on therapy for BP control in patients with resistant hypertension

### What this study adds

Using a large clinical cohort derived from the EMR we determined that 30.3% of the patients prescribed spironolactone did not achieve a mean decrease in either SBP or DBP of at least 5 mmHg or 2 mmHg, respectively. Consistent with spironolactone's mechanism of action we demonstrate that the decrease in BP was significantly associated with changes in serum sodium and potassium. We also demonstrate that decreasing BP is associated with a decrease in eGFR and increase in creatinine similar to that observed following RAAS antagonism by ACEis or ARBs. Finally, the association between change in BP and glucose homeostasis warrants further scrutiny.

**Spironolactone**

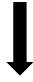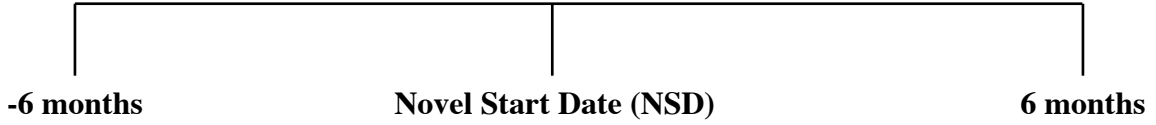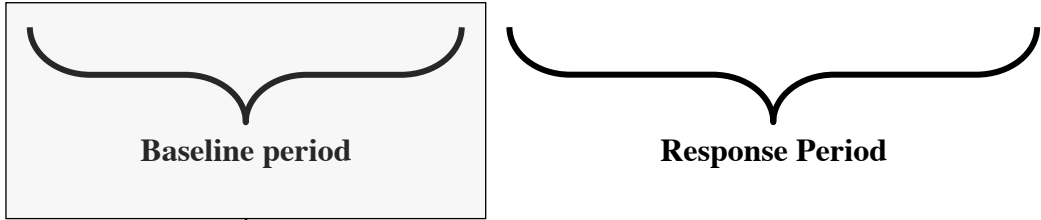

**Ex. Baseline period determination**

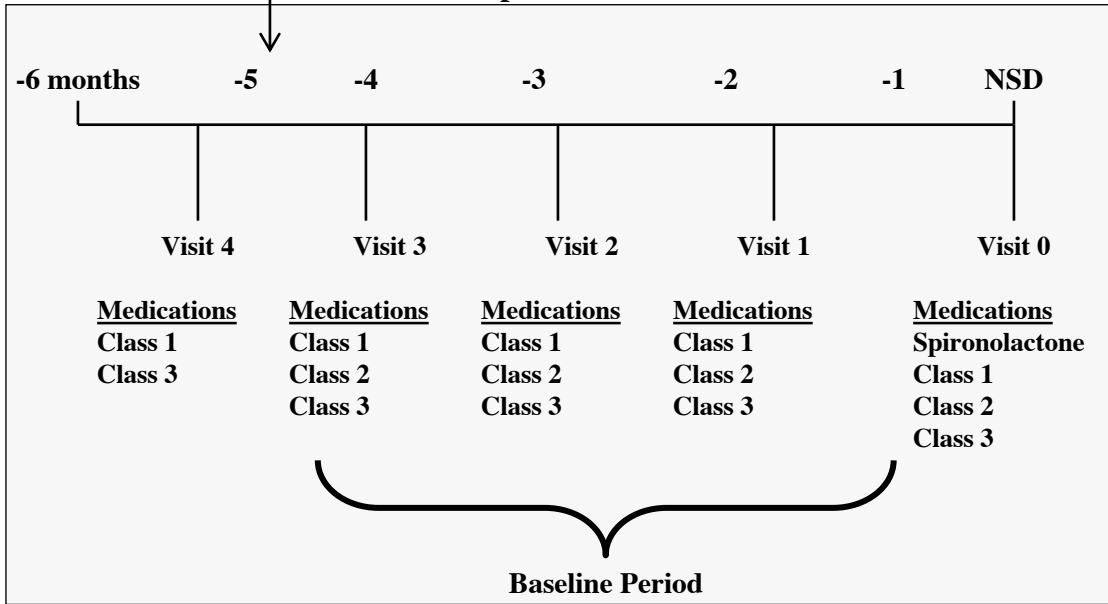

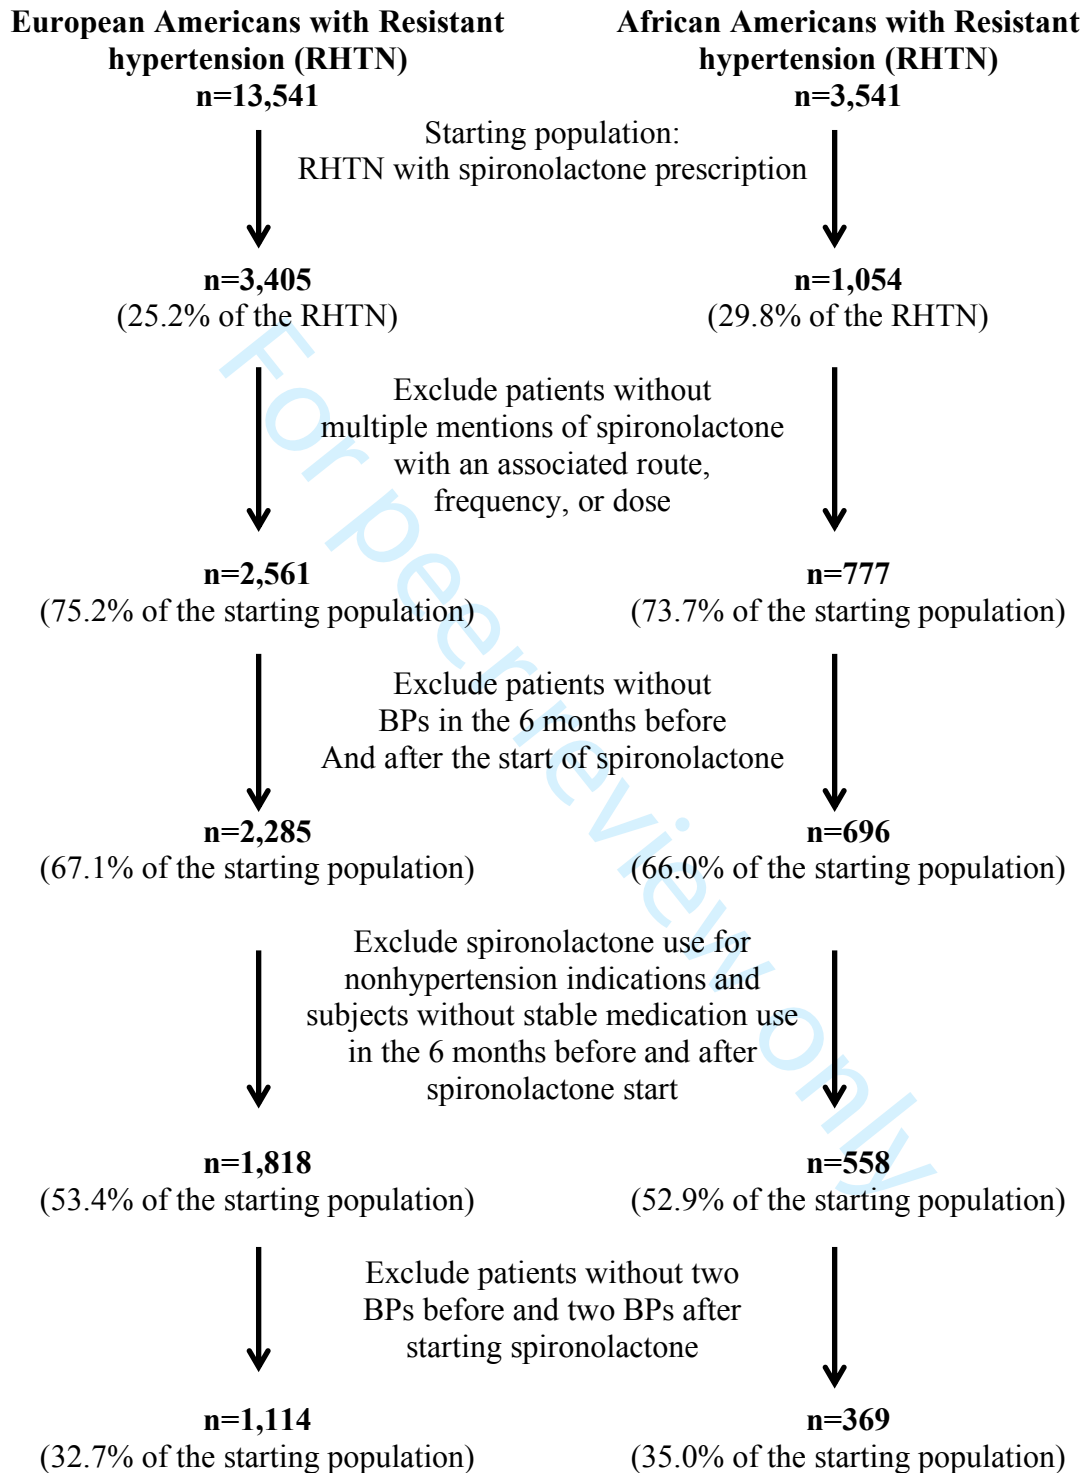

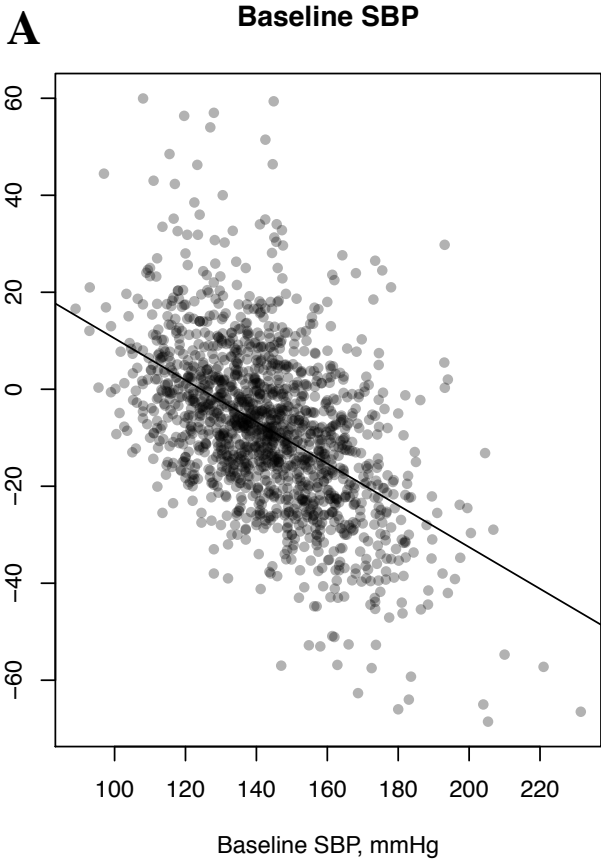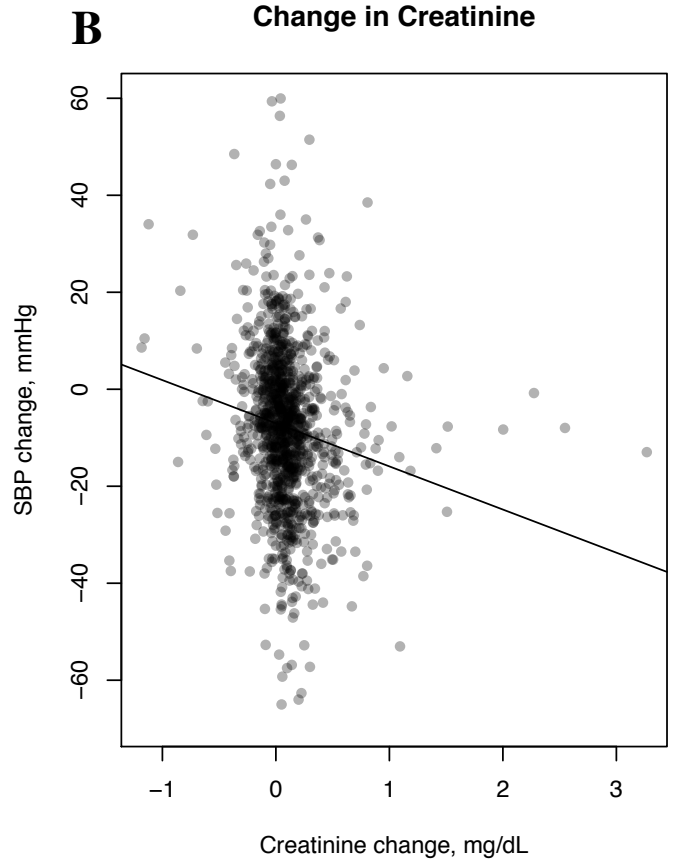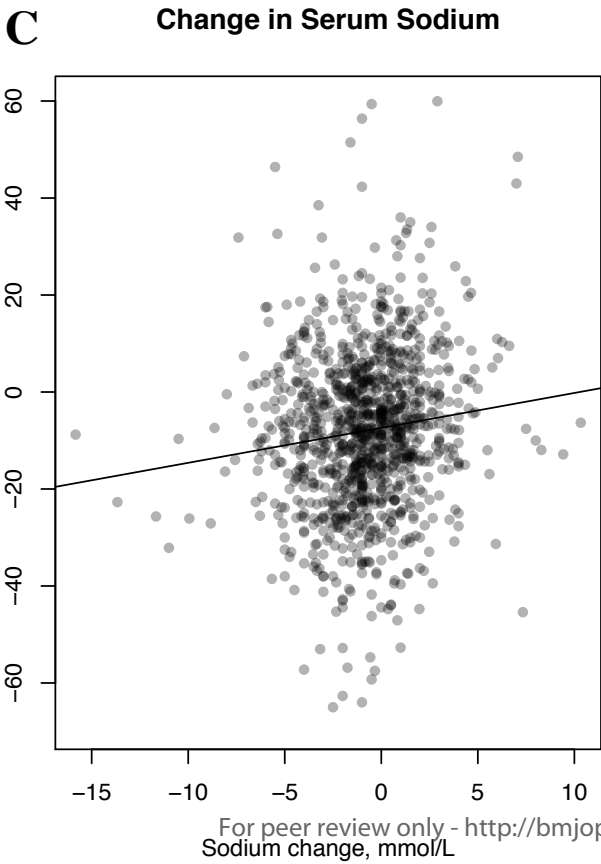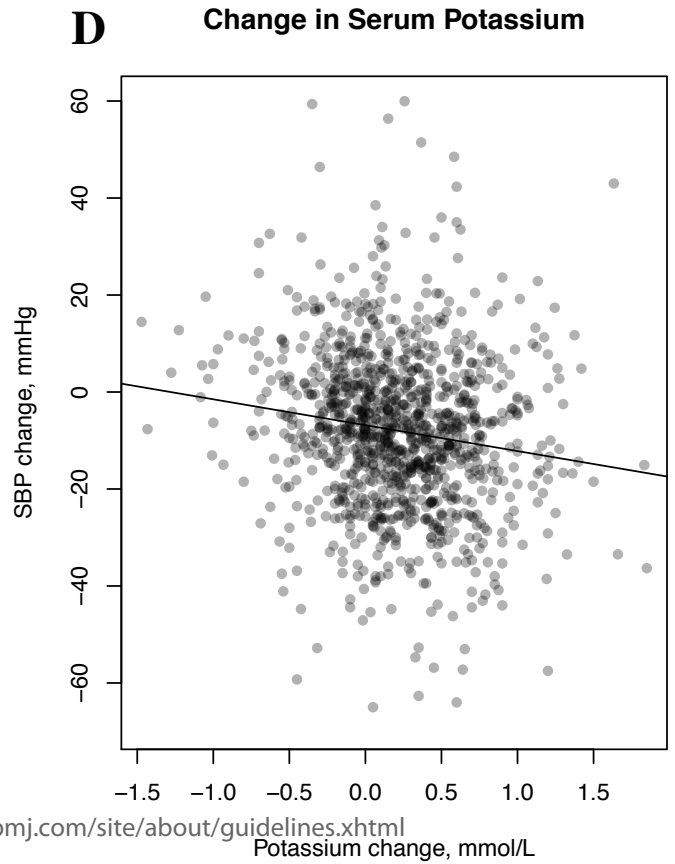

## DATA SUPPLEMENT

**Supplemental Table 1. International Classifiers of Disease (ICD)-9 and ICD-10 codes used for history of diagnosis**

| Diagnosis                | ICD-9 codes | ICD-10 codes | Other                                                 |
|--------------------------|-------------|--------------|-------------------------------------------------------|
| Chronic kidney disease   | 585.1       | N18.1        | eGFR > 30 mL/min/1.73                                 |
| stage 3                  | 585.2       | N18.2        | m <sup>2</sup> but < 60 mL/min/1.73<br>m <sup>2</sup> |
| Ischemic heart disease   | 410.*       | I20.*        |                                                       |
|                          | 411.*       | I22.*        |                                                       |
|                          | 413.*       | I24.*        |                                                       |
|                          | 414.*       | I25.*        |                                                       |
| Type 2 diabetes mellitus | 250         | E11          |                                                       |
|                          | 250.*       | E11.*        |                                                       |
|                          | 327.2*      | G47.3*       |                                                       |
| Smoking                  | 305.1       | F17.*        |                                                       |
|                          | V15.82      | Z87.891      |                                                       |

Abbreviations: eGFR, estimated glomerular filtration rate

**Supplemental Table 2. International Classifiers of Disease (ICD)-9 and -10 exclusions for resistant hypertensive subjects**

| Description                                                                                                                              | ICD-9-CM codes                                   | ICD-10-CM-codes                                 |
|------------------------------------------------------------------------------------------------------------------------------------------|--------------------------------------------------|-------------------------------------------------|
| <i>Exclusion for Case Type I, Case Type II, and Control if ever present in a patient record</i>                                          |                                                  |                                                 |
| Malignant neoplasm of unspecified adrenal gland                                                                                          | 194.0                                            | C74.9                                           |
| Benign neoplasm of unspecified adrenal gland                                                                                             | 227.0                                            | D35.00                                          |
| Disorders of the adrenal gland (excluding adrenal insufficiencies)                                                                       | 255.0, 255.1*, 255.2, 255.3, 255.6, 255.8, 255.9 | E24.*, E26.*, E25.*, E27.0, E27.5, E27.8, E27.9 |
| Secondary Hypertension                                                                                                                   | 405.*                                            | I15.0, I15.8                                    |
| Chronic pulmonary heart disease                                                                                                          | 416.*                                            | I27.*                                           |
| Nephrotic syndrome                                                                                                                       | 581.*                                            | N04.*, N08                                      |
| Chronic glomerulonephritis                                                                                                               | 582.*                                            | N03.*, N08                                      |
| Bulbus cordis anomalies                                                                                                                  | 745.*                                            | Q20.*, Q21.*                                    |
| Coarctation of aorta                                                                                                                     | 747.1*                                           | Q25.1, Q25.2                                    |
| <i>Exclusion for Case Type I and Case Type II if present in a patient record 5 years before or 1 year after identification as a Case</i> |                                                  |                                                 |
| Thyrotoxicosis                                                                                                                           | 242.*                                            | E05.*                                           |
| Disorder of thyrocalcitonin secretion                                                                                                    | 246.0                                            | E07.0                                           |
| Disorders of the thyroid NEC                                                                                                             | 246.8                                            | E03.4, E07.89                                   |
| Disorders of the thyroid NOS                                                                                                             | 246.9                                            | E07.9                                           |
| Parathyroid disorder NEC                                                                                                                 | 252.8                                            | E21.4                                           |
| Parathyroid disorder NOS                                                                                                                 | 252.9                                            | E21.5                                           |
| Obstructive uropathy                                                                                                                     | 599.6*                                           | N13.9                                           |

Abbreviations: NEC, not elsewhere classified; NOS, not otherwise classified



**Supplemental Table 3. Characteristics of spironolactone responders and nonresponders in European Americans.**

| Variable                        | N     | Nonresponders<br>(n=343) | Responders<br>(n=771) | p-value* |
|---------------------------------|-------|--------------------------|-----------------------|----------|
| Age, years                      | 1,114 | 65.66 ± 13.09            | 66.21 ± 12.04         | 0.50     |
| Female, n (%)                   | 1,114 | 151 (44.0%)              | 368 (47.7%)           | 0.25     |
| BMI, kg/m <sup>2</sup>          | 1,023 | 31.3 ± 7.2               | 32.5 ± 7.7            | 0.01     |
| Diagnostic History              |       |                          |                       |          |
| T2DM, n (%)                     | 1,114 | 173 (50.4%)              | 393 (51.0%)           | 0.87     |
| CKD3, n (%)                     | 1,114 | 124 (36.2%)              | 296 (38.4%)           | 0.48     |
| IHD, n (%)                      | 1,114 | 149 (43.4%)              | 280 (36.3%)           | 0.02     |
| Smoking, n (%)                  | 1,114 | 75 (21.9%)               | 157 (20.4%)           | 0.57     |
| Baseline measures               |       |                          |                       |          |
| SBP, mmHg                       | 1,114 | 131.37 ± 16.99           | 145.91 ± 18.52        | < 0.001  |
| DBP, mmHg                       | 1,114 | 69.46 ± 10.88            | 76.78 ± 12.52         | < 0.001  |
| Serum sodium, mmol/L            | 872   | 138.45 ± 3.26            | 139.04 ± 3.00         | 0.01     |
| Serum potassium,<br>mmol/L      | 871   | 3.99 ± 0.46              | 3.93 ± 0.43           | 0.07     |
| Creatinine, mg/dL               | 878   | 1.11 ± 0.37              | 1.07 ± 0.37           | 0.11     |
| eGFR, mL/min/1.73m <sup>2</sup> | 1,029 | 75.16 ± 24.47            | 75.23 ± 19.83         | 0.96     |

|                                                                        |     |                 |                 |         |
|------------------------------------------------------------------------|-----|-----------------|-----------------|---------|
| Glucose, mg/dL                                                         | 875 | 124.46 ± 56.69  | 126.59 ± 48.81  | 0.57    |
| HbA1c, %                                                               | 383 | 6.76 ± 1.67     | 7.24 ± 3.54     | 0.10    |
| HDL cholesterol, mg/dL                                                 | 420 | 46.96 ± 18.89   | 44.11 ± 14.83   | 0.10    |
| LDL cholesterol, mg/dL                                                 | 390 | 92.09 ± 37.86   | 95.30 ± 34.75   | 0.43    |
| Triglycerides, mg/dL                                                   | 426 | 167.8 ± 117.0   | 182.5 ± 129.4   | 0.27    |
| Difference from baseline following initial spironolactone prescription |     |                 |                 |         |
| Serum sodium, mmol/L                                                   | 810 | -0.70 ± 2.63    | -1.12 ± 2.71    | 0.04    |
| Serum potassium,<br>mmol/L                                             | 812 | 0.12 ± 0.48     | 0.27 ± 0.43     | < 0.001 |
| Creatinine, mg/dL                                                      | 816 | 0.01 ± 0.23     | 0.13 ± 0.32     | < 0.001 |
| eGFR, mL/min/1.73m <sup>2</sup>                                        | 924 | -4.82 ± 15.68   | -8.76 ± 14.51   | < 0.001 |
| Glucose, mg/dL                                                         | 810 | 1.44 ± 47.52    | 0.01 ± 39.03    | 0.65    |
| HbA1c, %                                                               | 181 | -0.13 ± 1.31    | -0.05 ± 0.92    | 0.63    |
| HDL cholesterol, mg/dL                                                 | 156 | 0.03 ± 9.35     | -0.94 ± 8.62    | 0.54    |
| LDL cholesterol, mg/dL                                                 | 142 | -7.29 ± 35.21   | -8.63 ± 35.09   | 0.86    |
| Triglycerides, mg/dL                                                   | 162 | -11.99 ± 107.79 | -22.93 ± 121.66 | 0.59    |

Abbreviations: BMI, body mass index; CKD 3, chronic kidney disease stage three; DBP, diastolic blood pressure; eGFR, estimated glomerular filtration rate; HbA1c, hemoglobin A1c; HDL, high-density lipoprotein; IHD, ischemic heart disease; LDL, low-density

1  
2  
3 lipoprotein; N, number of individuals with the specific measure; SBP, systolic blood  
4  
5 pressure.

6  
7  
8 Data are presented as mean  $\pm$  standard deviation for continuous variables and count (%) for  
9  
10 categorical variables.

11  
12 \* P-values from the multivariable regression model are provided for all variables except  
13  
14 HbA1c, HDL cholesterol, LDL cholesterol, and triglycerides. Univariate p-values are  
15  
16 provided for these variables.  
17  
18  
19  
20  
21  
22  
23  
24  
25  
26  
27  
28  
29  
30  
31  
32  
33  
34  
35  
36  
37  
38  
39  
40  
41  
42  
43  
44  
45  
46  
47  
48  
49  
50  
51  
52  
53  
54  
55  
56  
57  
58  
59  
60

**Supplemental Table 4. Characteristics of spironolactone responders and nonresponders in African Americans.**

| Variable                        | N   | Nonresponders<br>(n=106) | Responders<br>(n=263) | p-value* |
|---------------------------------|-----|--------------------------|-----------------------|----------|
| Age, years                      | 369 | 57.23 ± 11.30            | 58.65 ± 12.64         | 0.32     |
| Female, n (%)                   | 369 | 64 (60.3%)               | 164 (62.4%)           | 0.72     |
| BMI, kg/m <sup>2</sup>          | 335 | 35.3 ± 9.7               | 37.3 ± 9.2            | 0.40     |
| Diagnostic History              |     |                          |                       |          |
| T2DM, n (%)                     | 369 | 63 (59.4%)               | 173 (65.7%)           | 0.25     |
| CKD3, n (%)                     | 369 | 39 (36.8%)               | 102 (38.8%)           | 0.72     |
| IHD, n (%)                      | 369 | 30 (28.3%)               | 71 (27.0%)            | 0.80     |
| Smoking, n (%)                  | 369 | 21 (19.8%)               | 211 (20.5%)           | 0.87     |
| Baseline measures               |     |                          |                       |          |
| SBP, mmHg                       | 369 | 139.15 ± 17.46           | 152.51 ± 18.40        | < 0.001  |
| DBP, mmHg                       | 369 | 78.78 ± 11.67            | 85.50 ± 12.53         | < 0.001  |
| Serum sodium, mmol/L            | 304 | 139.37 ± 3.00            | 139.81 ± 2.85         | 0.23     |
| Serum potassium,<br>mmol/L      | 304 | 3.81 ± 0.50              | 3.84 ± 0.44           | 0.58     |
| Creatinine, mg/dL               | 306 | 1.14 ± 0.33              | 1.16 ± 0.54           | 0.73     |
| eGFR, mL/min/1.73m <sup>2</sup> | 353 | 81.69 ± 20.78            | 83.42 ± 22.80         | 0.51     |

|                                                                        |     |                 |                |      |
|------------------------------------------------------------------------|-----|-----------------|----------------|------|
| Glucose, mg/dL                                                         | 304 | 129.05 ± 64.32  | 128.05 ± 55.37 | 0.89 |
| HbA1c, %                                                               | 155 | 7.45 ± 2.17     | 7.22 ± 1.65    | 0.50 |
| HDL cholesterol, mg/dL                                                 | 155 | 49.07 ± 14.93   | 49.21 ± 15.95  | 0.56 |
| LDL cholesterol, mg/dL                                                 | 147 | 106.51 ± 43.81  | 106.70 ± 33.43 | 0.98 |
| Triglycerides, mg/dL                                                   | 152 | 151.35 ± 92.16  | 135.01 ± 88.22 | 0.34 |
| Difference from baseline following initial spironolactone prescription |     |                 |                |      |
| Serum sodium, mmol/L                                                   | 291 | 0.17 ± 2.52     | -0.52 ± 2.63   | 0.05 |
| Serum potassium, mmol/L                                                | 292 | 0.16 ± 0.50     | 0.19 ± 0.39    | 0.57 |
| Creatinine, mg/dL                                                      | 292 | 0.06 ± 0.23     | 0.14 ± 0.26    | 0.01 |
| eGFR, mL/min/1.73m <sup>2</sup>                                        | 330 | -6.50 ± 15.89   | -9.99 ± 16.61  | 0.09 |
| Glucose, mg/dL                                                         | 291 | -5.56 ± 48.63   | -1.37 ± 44.65  | 0.48 |
| HbA1c, %                                                               | 103 | -0.54 ± 0.97    | 0.02 ± 1.23    | 0.09 |
| HDL cholesterol, mg/dL                                                 | 58  | 3.17 ± 17.66    | -1.67 ± 10.92  | 0.24 |
| LDL cholesterol, mg/dL                                                 | 55  | 0.04 ± 19.86    | -4.82 ± 34.85  | 0.65 |
| Triglycerides, mg/dL                                                   | 58  | -43.47 ± 109.99 | -11.64 ± 61.01 | 0.21 |

Abbreviations: BMI, body mass index; CKD 3, chronic kidney disease stage three; DBP, diastolic blood pressure; eGFR, estimated glomerular filtration rate; HbA1c, hemoglobin A1c; HDL, high-density lipoprotein; IHD, ischemic heart disease; LDL, low-density

1  
2  
3 lipoprotein; N, number of individuals with the specific measure; SBP, systolic blood  
4  
5 pressure.

6  
7  
8 Data are presented as mean  $\pm$  standard deviation for continuous variables and count (%) for  
9  
10 categorical variables.

11  
12 \* P-values from the multivariable regression model are provided for all variables except  
13  
14 HbA1c, HDL cholesterol, LDL cholesterol, and triglycerides. Univariate p-values are  
15  
16 provided for these variables.  
17  
18  
19  
20  
21  
22  
23  
24  
25  
26  
27  
28  
29  
30  
31  
32  
33  
34  
35  
36  
37  
38  
39  
40  
41  
42  
43  
44  
45  
46  
47  
48  
49  
50  
51  
52  
53  
54  
55  
56  
57  
58  
59  
60

**STROBE 2007 (v4) Statement—Checklist of items that should be included in reports of cohort studies**

| Section/Topic             | Item # | Recommendation                                                                                                                                                                       | Reported on page #         |
|---------------------------|--------|--------------------------------------------------------------------------------------------------------------------------------------------------------------------------------------|----------------------------|
| <b>Title and abstract</b> | 1      | (a) Indicate the study’s design with a commonly used term in the title or the abstract                                                                                               | 1,2                        |
|                           |        | (b) Provide in the abstract an informative and balanced summary of what was done and what was found                                                                                  | 2,3                        |
| <b>Introduction</b>       |        |                                                                                                                                                                                      |                            |
| Background/rationale      | 2      | Explain the scientific background and rationale for the investigation being reported                                                                                                 | 5                          |
| Objectives                | 3      | State specific objectives, including any prespecified hypotheses                                                                                                                     | 5                          |
| <b>Methods</b>            |        |                                                                                                                                                                                      |                            |
| Study design              | 4      | Present key elements of study design early in the paper                                                                                                                              | 5-6, 7                     |
| Setting                   | 5      | Describe the setting, locations, and relevant dates, including periods of recruitment, exposure, follow-up, and data collection                                                      | 7                          |
| Participants              | 6      | (a) Give the eligibility criteria, and the sources and methods of selection of participants. Describe methods of follow-up                                                           | 7-11                       |
|                           |        | (b) For matched studies, give matching criteria and number of exposed and unexposed                                                                                                  |                            |
| Variables                 | 7      | Clearly define all outcomes, exposures, predictors, potential confounders, and effect modifiers. Give diagnostic criteria, if applicable                                             | 7-11                       |
| Data sources/ measurement | 8*     | For each variable of interest, give sources of data and details of methods of assessment (measurement). Describe comparability of assessment methods if there is more than one group | 7-11, Supplemental Table 1 |
| Bias                      | 9      | Describe any efforts to address potential sources of bias                                                                                                                            |                            |
| Study size                | 10     | Explain how the study size was arrived at                                                                                                                                            | 7-9, 13, Figure 2          |
| Quantitative variables    | 11     | Explain how quantitative variables were handled in the analyses. If applicable, describe which groupings were chosen and why                                                         | 9, 11                      |
| Statistical methods       | 12     | (a) Describe all statistical methods, including those used to control for confounding                                                                                                | 11                         |
|                           |        | (b) Describe any methods used to examine subgroups and interactions                                                                                                                  | 11                         |
|                           |        | (c) Explain how missing data were addressed                                                                                                                                          | 11                         |
|                           |        | (d) If applicable, explain how loss to follow-up was addressed                                                                                                                       |                            |
|                           |        | (e) Describe any sensitivity analyses                                                                                                                                                | 10-11                      |
| <b>Results</b>            |        |                                                                                                                                                                                      |                            |

|                          |     |                                                                                                                                                                                                                                                                                                                                                                                                               |                                                      |
|--------------------------|-----|---------------------------------------------------------------------------------------------------------------------------------------------------------------------------------------------------------------------------------------------------------------------------------------------------------------------------------------------------------------------------------------------------------------|------------------------------------------------------|
| Participants             | 13* | (a) Report numbers of individuals at each stage of study—eg numbers potentially eligible, examined for eligibility, confirmed eligible, included in the study, completing follow-up, and analysed<br>(b) Give reasons for non-participation at each stage<br>(c) Consider use of a flow diagram                                                                                                               | 13, Figure 2<br>Figure 2<br>Figure 2                 |
| Descriptive data         | 14* | (a) Give characteristics of study participants (eg demographic, clinical, social) and information on exposures and potential confounders<br>(b) Indicate number of participants with missing data for each variable of interest<br>(c) Summarise follow-up time (eg, average and total amount)                                                                                                                | 14, Tables 1 and 2<br>Tables 1 and 2<br>13, Figure 2 |
| Outcome data             | 15* | Report numbers of outcome events or summary measures over time                                                                                                                                                                                                                                                                                                                                                | 13-19                                                |
| Main results             | 16  | (a) Give unadjusted estimates and, if applicable, confounder-adjusted estimates and their precision (eg, 95% confidence interval). Make clear which confounders were adjusted for and why they were included<br>(b) Report category boundaries when continuous variables were categorized<br>(c) If relevant, consider translating estimates of relative risk into absolute risk for a meaningful time period | 14-20, Table 1, 2, and 3<br>13                       |
| Other analyses           | 17  | Report other analyses done—eg analyses of subgroups and interactions, and sensitivity analyses                                                                                                                                                                                                                                                                                                                | Table 3, Supplemental tables 3 and 4                 |
| <b>Discussion</b>        |     |                                                                                                                                                                                                                                                                                                                                                                                                               |                                                      |
| Key results              | 18  | Summarise key results with reference to study objectives                                                                                                                                                                                                                                                                                                                                                      | 24-27                                                |
| <b>Limitations</b>       |     |                                                                                                                                                                                                                                                                                                                                                                                                               |                                                      |
| Interpretation           | 20  | Give a cautious overall interpretation of results considering objectives, limitations, multiplicity of analyses, results from similar studies, and other relevant evidence                                                                                                                                                                                                                                    | 4, 26-27                                             |
| Generalisability         | 21  | Discuss the generalisability (external validity) of the study results                                                                                                                                                                                                                                                                                                                                         | 4, 26-27                                             |
| <b>Other information</b> |     |                                                                                                                                                                                                                                                                                                                                                                                                               |                                                      |
| Funding                  | 22  | Give the source of funding and the role of the funders for the present study and, if applicable, for the original study on which the present article is based                                                                                                                                                                                                                                                 | 29                                                   |

\*Give information separately for cases and controls in case-control studies and, if applicable, for exposed and unexposed groups in cohort and cross-sectional studies.

**Note:** An Explanation and Elaboration article discusses each checklist item and gives methodological background and published examples of transparent reporting. The STROBE checklist is best used in conjunction with this article (freely available on the Web sites of PLoS Medicine at <http://www.plosmedicine.org/>, Annals of Internal Medicine at <http://www.annals.org/>, and Epidemiology at <http://www.epidem.com/>). Information on the STROBE Initiative is available at [www.strobe-statement.org](http://www.strobe-statement.org).



# BMJ Open

## Development of an Electronic Algorithm to Determine and Characterize the Blood Pressure Response to Spironolactone in Patients with Apparent Therapy-resistant Hypertension in an Electronic Medical Record

|                                 |                                                                                                                                                                                                                                                                                                                                                          |
|---------------------------------|----------------------------------------------------------------------------------------------------------------------------------------------------------------------------------------------------------------------------------------------------------------------------------------------------------------------------------------------------------|
| Journal:                        | <i>BMJ Open</i>                                                                                                                                                                                                                                                                                                                                          |
| Manuscript ID                   | bmjopen-2019-033100.R1                                                                                                                                                                                                                                                                                                                                   |
| Article Type:                   | Original research                                                                                                                                                                                                                                                                                                                                        |
| Date Submitted by the Author:   | 07-Jan-2020                                                                                                                                                                                                                                                                                                                                              |
| Complete List of Authors:       | Shuey, Megan; Vanderbilt University Medical Center, Perkins, Bradley; Vanderbilt University School of Medicine<br>Nian, Hui; Vanderbilt University Department of Biostatistics, Yu, Chang; Vanderbilt University School of Medicine<br>Luther, James; Vanderbilt University School of Medicine<br>Brown, Nancy; Vanderbilt University School of Medicine |
| <b>Primary Subject Heading</b>: | Health informatics                                                                                                                                                                                                                                                                                                                                       |
| Secondary Subject Heading:      | Pharmacology and therapeutics                                                                                                                                                                                                                                                                                                                            |
| Keywords:                       | spironolactone, blood pressure response, mineralocorticoid receptor antagonist, electronic medical records, Hypertension < CARDIOLOGY                                                                                                                                                                                                                    |
|                                 |                                                                                                                                                                                                                                                                                                                                                          |

SCHOLARONE™  
Manuscripts



I, the Submitting Author has the right to grant and does grant on behalf of all authors of the Work (as defined in the below author licence), an exclusive licence and/or a non-exclusive licence for contributions from authors who are: i) UK Crown employees; ii) where BMJ has agreed a CC-BY licence shall apply, and/or iii) in accordance with the terms applicable for US Federal Government officers or employees acting as part of their official duties; on a worldwide, perpetual, irrevocable, royalty-free basis to BMJ Publishing Group Ltd ("BMJ") its licensees and where the relevant Journal is co-owned by BMJ to the co-owners of the Journal, to publish the Work in this journal and any other BMJ products and to exploit all rights, as set out in our [licence](#).

The Submitting Author accepts and understands that any supply made under these terms is made by BMJ to the Submitting Author unless you are acting as an employee on behalf of your employer or a postgraduate student of an affiliated institution which is paying any applicable article publishing charge ("APC") for Open Access articles. Where the Submitting Author wishes to make the Work available on an Open Access basis (and intends to pay the relevant APC), the terms of reuse of such Open Access shall be governed by a Creative Commons licence – details of these licences and which [Creative Commons](#) licence will apply to this Work are set out in our licence referred to above.

Other than as permitted in any relevant BMJ Author's Self Archiving Policies, I confirm this Work has not been accepted for publication elsewhere, is not being considered for publication elsewhere and does not duplicate material already published. I confirm all authors consent to publication of this Work and authorise the granting of this licence.

1  
2  
3 **Development of an Electronic Algorithm to Determine and Characterize the Blood**  
4 **Pressure Response to Spironolactone in Patients with Apparent Therapy-resistant**  
5 **Hypertension in an Electronic Medical Record**  
6  
7  
8  
9  
10  
11

12 Megan M. Shuey, Ph.D.;<sup>1</sup> Bradley Perkins, B.S.;<sup>1</sup> Hui Nian, Ph.D.;<sup>2</sup> Chang Yu, Ph.D.;<sup>2</sup>

13  
14 James M. Luther, M.D.;<sup>1</sup> Nancy J. Brown, M.D.<sup>1\*</sup>  
15  
16  
17

18  
19 Departments of Medicine<sup>1</sup> and Biostatistics,<sup>2</sup> Vanderbilt University School of Medicine,  
20  
21 Nashville, TN.  
22  
23  
24  
25

26 **\*Corresponding author:**  
27

28 Nancy J. Brown, M.D.  
29

30 D-3100 Medical Center North  
31

32 Vanderbilt University School of Medicine  
33

34 Nashville, TN, 37232-2358  
35

36 Fax: (615) 343-2551  
37

38 Tel.:(615) 343-8701  
39

40 Email: nancy.j.brown@vumc.org  
41  
42  
43  
44  
45  
46  
47  
48  
49  
50  
51  
52  
53  
54  
55  
56  
57  
58  
59  
60

## ABSTRACT

**Objective:** Identify blood pressure (BP) response to spironolactone in patients with apparent therapy-resistant hypertension (aTRH) using electronic medical records (EMRs) in order to estimate response in a real-world clinical setting.

**Design:** Developed an algorithm to determine BP and electrolyte response to spironolactone.

**Setting:** An academic medical center in Nashville, Tennessee

**Population:** Patients with aTRH prescribed spironolactone.

**Main Outcome Measures:** Baseline BP and BP response, determined as the change in mean systolic and diastolic BP (SBP and DBP, respectively) following spironolactone initiation. Additional response measures were serum sodium, potassium, and creatinine, estimated glomerular filtration rate, hemoglobin A1c (HbA1c), glucose, high density lipoprotein, low density lipoprotein, triglycerides. Demographic characteristics included race, age, gender, body mass index (BMI), diabetes mellitus, chronic kidney disease stage three, ischemic heart disease, and smoking.

**Results:** The mean decreases in SBP and DBP were 8.1 and 3.4 mmHg, consistent with clinical trial data. Using a mean decrease in SBP of five mmHg or in DBP of two mmHg to define “responders,” 30.3% of patients did not respond. In univariable analyses, responders had higher BMI, baseline SBP, DBP, sodium, and HbA1c, and lower creatinine. In multivariable analysis, responders were older and had significantly higher BMI and baseline SBP and DBP, and lower potassium. Increases in potassium and creatinine following spironolactone were larger in responders. When BP was evaluated as a continuous variable, decreases in SBP and DBP correlated with baseline BP, decrease

1  
2  
3 in sodium, and increases in potassium and creatinine following spironolactone. The  
4  
5 decrease in SBP was associated with decreasing glucose in European Americans.  
6

7  
8 **Conclusions:** We developed an algorithm to assess BP response to a commonly  
9  
10 prescribed medication for aTRH using EMRs. Electrolyte changes associated with the BP  
11  
12 response to spironolactone are consistent with its mechanism of action of blocking the  
13  
14 mineralocorticoid receptor and decreasing epithelial sodium channel activity.  
15  
16  
17  
18  
19  
20  
21  
22  
23  
24  
25  
26  
27  
28  
29  
30  
31  
32  
33  
34  
35  
36  
37  
38  
39  
40  
41  
42  
43  
44  
45  
46  
47  
48  
49  
50  
51  
52  
53  
54  
55  
56  
57  
58  
59  
60

### Strengths and Limitations of this study:

- This study defined the blood pressure response to spironolactone in a large number of patients with apparent therapy-resistant hypertension (aTRH) using the electronic medical record. The accuracy of algorithms for the identifying patients with aTRH who were initiated on spironolactone were validated by manual review.
- The availability of clinical electrolyte measurements, in addition to blood pressure measurements, provides data supporting the mechanism of mineralocorticoid receptor (MR) antagonism in responders to spironolactone.
- This study provides methodology which can be applied in future pharmacogenetic studies using electronic health records. The algorithm can be adapted for use in other large-scale electronic medical record systems with linked genetic data.
- Limitations of this study include the inability to confirm medication adherence, a lack of ambulatory blood pressure measurements, and a lack of some laboratory measures, such as hemoglobin A1c (HbA1c) and lipids, for the entire population.

**Keywords:** spironolactone; mineralocorticoid receptor antagonist; blood pressure response; apparent therapy-resistant hypertension; electronic medical record

## INTRODUCTION

The mineralocorticoid receptor (MR) antagonist spironolactone has been identified as effective add-on therapy for blood pressure (BP) control in patients with apparent therapy-resistant hypertension (aTRH) in clinical trials, including the Anglo-Scandinavian Cardiac Outcomes Trial-Blood Pressure Lowering Arm (ASCOT-BPLA) and the Prevention and Treatment of Hypertension with Algorithm Based Therapy-2 (PATHWAY-2).<sup>1-4</sup> In the PATHWAY-2 trial, addition of spironolactone at a dose of 25-50 mg/day to a therapeutic regimen containing an angiotensin-converting enzyme inhibitor (ACEi) or angiotensin receptor blocker (ARB), calcium channel blocker (CCB), and thiazide-like diuretic significantly decreased home systolic blood pressure (SBP) by a mean of 8.7 mmHg.<sup>1</sup> In prior clinical studies the SBP/diastolic blood pressure (DBP) responses to spironolactone have ranged from a mean decrease of 4.6/1.8 mmHg to a mean decrease of 25/12 mmHg.<sup>1-5</sup>

Clinical trials often assess homogenous groups of patients limiting the applicability in a real-world clinical setting. We hypothesized that we could use electronic medical records (EMR) to assess the BP response to the addition of spironolactone in resistant hypertensive patients who were on a stable anti-hypertensive regimen of at least three medications including a thiazide diuretic or dihydropyridine CCB. We used a previously published algorithm for the identification of patients with aTRH.<sup>6</sup> To evaluate the BP response to spironolactone we developed an additional algorithm to identify patients who were prescribed spironolactone during a period of

1  
2  
3 stable medication use from up to six months before the start of spironolactone to six  
4  
5 months after. The accuracy of the algorithm was validated by electronic record review.  
6  
7

8 We collected all outpatient BPs and laboratory measurements during the period of  
9  
10 stable medication use before and after initial spironolactone prescription. We assessed BP  
11  
12 response as a continuous variable and as a dichotomized variable (responders vs non-  
13  
14 responders). We also assessed electrolyte measurements relevant to the mechanism of  
15  
16 action of spironolactone, MR antagonism.  
17  
18  
19  
20  
21  
22  
23  
24  
25  
26  
27  
28  
29  
30  
31  
32  
33  
34  
35  
36  
37  
38  
39  
40  
41  
42  
43  
44  
45  
46  
47  
48  
49  
50  
51  
52  
53  
54  
55  
56  
57  
58  
59  
60



## METHODS

### Electronic Medical Record

We obtained Institutional Review Board approval to access the Vanderbilt University Medical Center (VUMC) Synthetic Derivative (SD). The SD is a de-identified copy of the VUMC EMR with Health Insurance Portability and Accountability Act of 1996 (HIPAA) identifiers removed by established de-identification software as well as custom techniques.<sup>7</sup> The SD contains almost all available clinical data including basic demographics, such as race and sex; text from clinical care notes; laboratory values; inpatient and outpatient medication data; international classification of disease (ICD) and current procedural terminology (CPT) codes; and other diagnostic reports.<sup>7</sup> To date, the SD contains approximately 2.8 million records, approximately one million of which contain detailed longitudinal data.

### Spironolactone Response Algorithm Development

Patients within the SD were identified as having aTRH using a previously published algorithm.<sup>6</sup> Patients were defined as having aTRH if their BP was greater than or equal to 140/90 mmHg, despite concurrent use of three antihypertensives including a thiazide diuretic or dihydropyridine CCB, or if they were taking four or more antihypertensive medications, including a thiazide diuretic or dihydropyridine CCB. Patients with secondary hypertension, chronic kidney disease (CKD) stages four and five, heart failure with reduced ejection fraction less than 35 percent, thyroid and parathyroid disorders, nephrotic syndrome, chronic glomerulonephritis, anomalies of the bulbus

1  
2  
3 cordis, coarctation of the aorta, adrenal gland neoplasms and disorders (excluding adrenal  
4 insufficiencies), chronic pulmonary heart disease, thyrotoxicosis, disorders of  
5 thyrocalcitonin secretion, and obstructive uropathy were excluded by the aTRH algorithm  
6  
7  
8  
9  
10 **(Supplemental Table 1).**

11  
12 All drug exposures to antihypertensive medications including spironolactone were  
13 identified from the SD by electronic-prescribing tools and MedEx.<sup>8</sup> The utility of these  
14 tools for extracting medication data from the EMR has been shown previously.<sup>9, 10</sup> For a  
15 medication exposure to be considered valid at least one of the following identifiers- dose,  
16 route, frequency, or duration- was required.  
17  
18  
19  
20  
21  
22

23  
24 We developed an algorithm to identify patients in the SD who were prescribed  
25 spironolactone and in whom BP was measured within a stable window of time before and  
26 after initiation of spironolactone. Using electronic prescribing tools and MedEx,<sup>8</sup> the  
27 novel start date (NSD) for a spironolactone prescription was determined by the earliest  
28 mention of spironolactone, aldactone, or aldactazide in a patient's record after the patient  
29 met the aTRH case definition. In addition, spironolactone, aldactone, or aldactazide  
30 prescription had to have been listed at least twice, at least one month apart, during the  
31 subsequent six-month period. Patients who were initiated on aldactazide  
32 (aldactone/hydrochlorothiazide combination therapy) were required to have been using a  
33 thiazide diuretic immediately prior to the NSD for aldactazide. Patients who were not  
34 prescribed a thiazide prior to the start of aldactazide were excluded as having been started  
35 on spironolactone and hydrochlorothiazide (HCTZ) concurrently. Use of the MR  
36 antagonist eplerenone was not included in the study as it was prescribed to only 2% of the  
37 resistant hypertensive population.  
38  
39  
40  
41  
42  
43  
44  
45  
46  
47  
48  
49  
50  
51  
52  
53  
54  
55  
56  
57  
58  
59  
60

1  
2  
3 Patients prescribed spironolactone without an outpatient BP measurement in the  
4  
5 six months before or after the NSD were excluded. Patients who were diagnosed with  
6  
7 other indications for spironolactone including heart failure, hepatic cirrhosis,  
8  
9 hyperandrogenism, acne, or polycystic ovarian syndrome within a year of the NSD were  
10  
11 also excluded. Using the algorithm, we identified sliding time windows up to six months  
12  
13 before (baseline) and six months after the NSD (response) when there were no changes to  
14  
15 each patient's prescribed antihypertensive medications, including dose (when available),  
16  
17 the number of medications, and class type (**Figure 1**).

21  
22 Once the baseline and response periods were defined, all outpatient BP  
23  
24 measurements taken during these periods were identified. Any patient without at least  
25  
26 two BP measurements during the baseline and response periods was excluded. The SBP  
27  
28 and DBP responses were calculated as the difference between the mean SBP or DBP in  
29  
30 the stable post-treatment window minus the mean SBP or DBP in the pre-treatment  
31  
32 window (e.g.  $\Delta SBP = \overline{SBP}_{post} - \overline{SBP}_{pre}$ ). Any SBP and DBP responses that were  
33  
34 more than two standard deviations from the mean were reviewed manually to confirm  
35  
36 accuracy.  
37  
38

39  
40 We also defined patients as responders versus non-responders based on a review  
41  
42 of BP responses reported in clinical trials of spironolactone in European (EA) and  
43  
44 African Americans (AA).<sup>1-5</sup> We defined responders as those who had a decrease in mean  
45  
46 SBP of at least five mmHg or a decrease in mean DBP of at least two mmHg,  
47  
48 corresponding to the smallest SBP and DBP responses to spironolactone reported among  
49  
50 the studies reviewed.<sup>5</sup>  
51  
52  
53  
54  
55  
56  
57  
58  
59  
60

1  
2  
3 All patient characteristics, including age, gender, race, body mass index (BMI),  
4 outpatient BP measurements, serum potassium, creatinine, and sodium, high-density  
5 lipoprotein (HDL) cholesterol, low-density lipoprotein (LDL) cholesterol, triglycerides,  
6 glucose, hemoglobin A1C (HbA1c), and history of CKD stage three, ischemic heart  
7 disease (IHD), type two diabetes mellitus (T2DM), and smoking, were extracted from the  
8 SD using a combination of ICD-9 and -10 codes, CPT codes, laboratory measurements,  
9 and natural-language processing (**Supplemental Table 2**). Aldosterone, renin, renin  
10 activity, and aldosterone-renin-ratio (ARR) were not evaluated due to the small numbers  
11 of patients with data. For each patient, age and BMI at NSD or the date closest to NSD  
12 was used. The estimated glomerular filtration rate (eGFR) was calculated using the  
13 Modification of Diet in Renal Disease (MDRD) formula.<sup>11</sup> CKD stage three was defined  
14 as an eGFR  $\geq 30$  mL/min/1.73m<sup>2</sup> and  $\leq 60$  mL/min/1.73m<sup>2</sup> or equivalent ICD-9 or -10  
15 code at any point before NSD. Patient race was administratively assigned in the SD  
16 based on either physician or patient report. Previous work has shown that self-identified  
17 race is highly correlated with genetic ancestry<sup>12, 13</sup> and administratively assigned race in  
18 the VUMC SD is sufficient for genetic association analyses<sup>14</sup> and correlates tightly with  
19 genetic ancestry.<sup>13</sup>

20  
21  
22 After the algorithms were iteratively refined, blinded chart reviews of randomly  
23 chosen, never overlapping, charts were performed to determine algorithm efficacy.  
24 Based on a population size of 17,082, review of 138 charts would allow detection of a  
25 misclassification rate of 10% with a margin of error of 5%. We therefore reviewed 150  
26 charts to determine algorithm efficacy. The review consisted of 75 charts from resistant  
27 hypertensive patients that were included by the algorithm and 75 that were excluded. The

1  
2  
3 algorithm was refined until a negative predictive value (NPV), positive predictive value  
4 (PPV), sensitivity, and specificity greater than 90% was achieved based on the review of  
5  
6 150 charts. The final version of the algorithm will be made available at Phenotype  
7  
8 KnowledgeBase (PheKB).<sup>15</sup>  
9

## 10 11 12 13 14 15 **Statistical Methods**

16  
17 Data are presented as frequencies for categorical variables and mean  $\pm$  standard  
18  
19 deviations for continuous variables. Univariable analysis for binary BP response was  
20  
21 performed using Pearson's chi-squared test for categorical variables and the Wilcoxon  
22  
23 rank-sum test for continuous variables. A multivariable logistic regression model or  
24  
25 multivariable linear regression model was fitted for binary BP response and continuous  
26  
27 BP change on all variables available in more than 70% of the population. Missing values  
28  
29 were not imputed. HDL cholesterol, LDL cholesterol, triglycerides, and HbA1c were  
30  
31 excluded from multivariable regression models due to large amounts of missing values.  
32  
33 The method of complete-case analysis was used and a linear relationship was assumed  
34  
35 for all the continuous variables. All statistical analyses were conducted using the SPSS  
36  
37 software version 24 (SPSS, Chicago, IL, USA) or R 3.3.0.<sup>16</sup>  
38  
39  
40  
41  
42  
43

## 44 45 **Patient and Public Involvement**

46  
47 Because this study involved the use of the VUMC SD, patients were not recruited  
48  
49 and there was no intervention. While patients were not involved in the development of  
50  
51 the specific research question or study design, there has been extensive patient and  
52  
53 community engagement in the establishment of the SD. Further, a community advisory  
54  
55  
56  
57  
58  
59  
60

1  
2  
3  
4  
5  
6  
7  
8  
9  
10  
11  
12  
13  
14  
15  
16  
17  
18  
19  
20  
21  
22  
23  
24  
25  
26  
27  
28  
29  
30  
31  
32  
33  
34  
35  
36  
37  
38  
39  
40  
41  
42  
43  
44  
45  
46  
47  
48  
49  
50  
51  
52  
53  
54  
55  
56  
57  
58  
59  
60

board within the Vanderbilt Institute for Clinical and Translational Research (VICTR)  
reviews programs including the SD. Dissemination of study results will occur through  
local reporting of study results.

For peer review only

## RESULTS

### Algorithm validation

NPV, PPV, sensitivity, and specificity of the algorithm for spironolactone response were determined after the blinded review of 150 electronic records. All but one excluded record were excluded appropriately. That record was excluded by the algorithm due to an erroneous ascertainment that a medication other than spironolactone had been added during the response periods. Five of the 75 records included in the algorithm should have been excluded. Four of these patients had inconsistencies in their medication history during the baseline or response period. In another patient, spironolactone was listed as a potential therapy in several notes but was not apparently prescribed. Based on this review, the NPV was 98.7%, PPV was 93.3%, sensitivity was 98.6%, and specificity was 93.7%.

### Identification of spironolactone response population

Among EA and AA patients with aTRH in the SD 3,405 EA and 1,054 AA were prescribed spironolactone. Consistent with the aTRH definition, in addition to other antihypertensive medications, patients were prescribed a thiazide diuretic or a dihydropyridine CCB prior to spironolactone initiation. The median daily dose of thiazide diuretic was 25 mg with a range from 12.5 mg to 50 mg (**Supplemental Table 3**). The predominant dihydropyridine CCBs prescribed were amlodipine and nifedipine. The median daily dose of amlodipine and nifedipine were 10 mg with a range from 2.5 mg to 10 mg and 90 mg with a range from 30 mg to 120 mg, respectively (**Supplemental Table 3**). For a subset of these patients the thiazide or dihydropyridine CCB dose at

1  
2  
3 spironolactone initiation, e.g. dose of the medication identified in the month preceding or  
4 following spironolactone prescription, could not be determined. From the patients with  
5 confirmed doses 566 (80.6%) were prescribed a 25 mg thiazide, 312 (73.9%) were  
6 prescribed 10 mg amlodipine, and 110 (40.3%) were prescribed 90 mg nifedipine.  
7  
8  
9

10  
11  
12 After applying exclusion and inclusion criteria, 1,114 EA patients and 369 AA  
13 patients were included in the study for evaluation of spironolactone response, 32.7% and  
14 35.0% of the original number of patients prescribed spironolactone, respectively (**Figure**  
15 **2**). The median dose of spironolactone was 25 mg and ranged from 12.5 to 200 mg. The  
16 majority of patients included in the study, 1,050 (70.8%), were prescribed 25 mg of  
17 spironolactone. 107 patients were prescribed spironolactone at a dose of 12.5mg and one  
18 at a dose of 200 mg. In total, 261 patients (17.6%) patients were prescribed a 50 mg or  
19 greater dose of spironolactone. The average number of outpatient BPs measured during  
20 the baseline and response periods were 4 and 4.8, respectively.  
21  
22  
23  
24  
25  
26  
27  
28  
29  
30  
31  
32  
33  
34

### 35 **Characteristics of spironolactone responders and non-responders**

36  
37  
38 Defining spironolactone response as a reduction in SBP of at least five mmHg or  
39 in DBP of at least two mmHg, we identified 1,034 responders (69.7%) and 449 non-  
40 responders (30.3%) in the total population. Of the responders, 15.8% met the criteria for a  
41 DBP response, 19.4% for a SBP response, and 64.8% for both a DBP and SBP response.  
42 Patient characteristics appear in **Table 1**. In univariable analyses, patients who  
43 responded to spironolactone were heavier and less likely to have a history of IHD.  
44 Responders had significantly higher baseline SBP, DBP, serum sodium, and HbA1c, and  
45 significantly lower baseline creatinine than nonresponders (**Table 1**). Responders also  
46  
47  
48  
49  
50  
51  
52  
53  
54  
55  
56  
57  
58  
59  
60



1  
2  
3 had greater decreases in serum sodium and eGFR as well as greater increases in serum  
4 potassium and creatinine after starting spironolactone than nonresponders (**Table 1**).  
5  
6  
7 HbA1c did not change in responders whereas it declined over time in non-responders. In  
8  
9  
10 a multivariable model adjusting for all variables present in at least 1000 patients,  
11  
12 responders were older and heavier, had higher baseline SBP and DBP, had lower baseline  
13  
14 serum potassium and had a greater increase in serum potassium and creatinine after  
15  
16 starting spironolactone than non-responders (**Table 2**).  
17  
18  
19  
20  
21  
22  
23  
24  
25  
26  
27  
28  
29  
30  
31  
32  
33  
34  
35  
36  
37  
38  
39  
40  
41  
42  
43  
44  
45  
46  
47  
48  
49  
50  
51  
52  
53  
54  
55  
56  
57  
58  
59  
60

**Table 1. Characteristics of spironolactone responders and nonresponders in the total population.**

| Variable                        | N    | Nonresponders<br>(n=449) | Responders<br>(n=1,034) | p-value |
|---------------------------------|------|--------------------------|-------------------------|---------|
| Age, years                      | 1483 | 63.67 ± 13.18            | 64.28 ± 12.63           | 0.33    |
| Female, n (%)                   | 1483 | 215 (47.9%)              | 532 (51.5%)             | 0.21    |
| Black Race, n (%)               | 1483 | 106 (23.6%)              | 263 (25.4%)             | 0.46    |
| BMI, kg/m <sup>2</sup>          | 1358 | 32.2 ± 8.0               | 33.5 ± 8.3              | 0.004   |
| Diagnostic History              |      |                          |                         |         |
| T2DM, n (%)                     | 1483 | 236 (52.6%)              | 566 (54.7%)             | 0.44    |
| CKD3, n (%)                     | 1483 | 163 (36.3%)              | 398 (38.5%)             | 0.43    |
| IHD, n (%)                      | 1483 | 179 (39.9%)              | 351 (33.9%)             | 0.03    |
| Smoking, n (%)                  | 1483 | 96 (21.4%)               | 211 (20.4%)             | 0.67    |
| Baseline measurements           |      |                          |                         |         |
| SBP, mmHg                       | 1483 | 133.20 ± 17.40           | 147.59 ± 18.70          | < 0.001 |
| DBP, mmHg                       | 1483 | 71.66 ± 11.74            | 79.00 ± 13.08           | < 0.001 |
| Serum sodium, mmol/L            | 1176 | 138.67 ± 3.22            | 139.25 ± 2.98           | 0.004   |
| Serum potassium, mmol/L         | 1177 | 3.95 ± 0.47              | 3.91 ± 0.43             | 0.15    |
| Creatinine, mg/dL               | 1184 | 1.12 ± 0.36              | 1.09 ± 0.42             | 0.03    |
| eGFR, mL/min/1.73m <sup>2</sup> | 1382 | 76.73 ± 23.78            | 77.38 ± 20.95           | 0.51    |
| Glucose, mg/dL                  | 1179 | 125.56 ± 58.56           | 126.98 ± 50.61          | 0.80    |
| HbA1c, %                        | 538  | 6.91 ± 1.81              | 7.23 ± 3.06             | 0.02    |
| HDL cholesterol, mg/dL          | 575  | 47.48 ± 17.97            | 45.53 ± 15.31           | 0.44    |

|                                                                        |      |                 |                 |         |
|------------------------------------------------------------------------|------|-----------------|-----------------|---------|
| LDL cholesterol, mg/dL                                                 | 537  | 95.65 ± 39.74   | 98.54 ± 34.72   | 0.41    |
| Triglycerides, mg/dL                                                   | 578  | 163.98 ± 111.71 | 169.39 ± 121.20 | 0.85    |
| Difference from baseline following initial spironolactone prescription |      |                 |                 |         |
| Serum sodium, mmol/L                                                   | 1101 | -0.49 ± 2.63    | -0.95 ± 2.70    | 0.006   |
| Serum potassium, mmol/L                                                | 1104 | 0.13 ± 0.48     | 0.25 ± 0.42     | < 0.001 |
| Creatinine, mg/dL                                                      | 1108 | 0.02 ± 0.23     | 0.134 ± 0.30    | < 0.001 |
| eGFR, mL/min/1.73m <sup>2</sup>                                        | 1254 | -5.22 ± 15.73   | -9.09 ± 15.10   | < 0.001 |
| Glucose, mg/dL                                                         | 1101 | -0.27 ± 47.82   | -0.37 ± 40.62   | 0.88    |
| HbA1c, %                                                               | 284  | -0.25 ± 1.23    | 0.02 ± 1.05     | 0.02    |
| HDL cholesterol, mg/dL                                                 | 214  | 0.70 ± 11.51    | -1.36 ± 9.35    | 0.23    |
| LDL cholesterol, mg/dL                                                 | 197  | -5.74 ± 32.54   | -7.48 ± 34.94   | 0.77    |
| Triglycerides, mg/dL                                                   | 220  | -17.86 ± 107.95 | -19.43 ± 107.16 | 0.91    |

Abbreviations: BMI, body mass index; CKD3, chronic kidney disease stage three; DBP, diastolic blood pressure; eGFR, estimated glomerular filtration rate; HbA1c, hemoglobin A1c; HDL, high-density lipoprotein; IHD, ischemic heart disease; LDL, low-density lipoprotein; N, number of individuals with the specific measure; SBP, systolic blood pressure; T2DM, type 2 diabetes mellitus.

Data are presented as mean ± standard deviation for continuous variables and count (%) for categorical variables

**Table 2. Multivariable logistic regression model for responder versus non-responder in the total population without missing data (N=1019).**

|                                                                        | Odds Ratio* | 95% Confidence Interval | p-value |
|------------------------------------------------------------------------|-------------|-------------------------|---------|
| Age, years                                                             | 1.034       | 1.017-1.052             | < 0.001 |
| Gender, Male: Female                                                   | 0.897       | 0.603-1.323             | 0.59    |
| Race, White: Black                                                     | 1.217       | 0.800-1.849             | 0.36    |
| Mean BMI, kg/m <sup>2</sup>                                            | 1.030       | 1.008-1.054             | 0.01    |
| Diagnostic history                                                     |             |                         |         |
| T2DM, Yes: No                                                          | 1.132       | 0.794-1.615             | 0.49    |
| CKD3, Yes: No                                                          | 0.932       | 0.654-1.330             | 0.70    |
| IHD, Yes: No                                                           | 1.256       | 0.905-1.749             | 0.18    |
| Smoking, Yes: No                                                       | 1.074       | 0.745-1.559             | 0.71    |
| Baseline measurements                                                  |             |                         |         |
| SBP, mmHg                                                              | 1.034       | 1.023-1.046             | < 0.001 |
| DBP, mmHg                                                              | 1.043       | 1.025-1.062             | < 0.001 |
| Serum sodium, mmol/L                                                   | 1.013       | 0.957-1.071             | 0.66    |
| Serum potassium, mmol/L                                                | 1.686       | 1.106-2.588             | 0.02    |
| Creatinine, mg/dL                                                      | 1.266       | 0.603-2.995             | 0.57    |
| eGFR, mL/min/1.73m <sup>2</sup>                                        | 1.007       | 0.993-1.021             | 0.32    |
| Glucose, mg/dL                                                         | 0.999       | 0.996-1.003             | 0.80    |
| Difference from baseline following initial spironolactone prescription |             |                         |         |
| Serum sodium, mmol/L                                                   | 0.946       | 0.888-1.007             | 0.08    |

|                                 |       |             |       |
|---------------------------------|-------|-------------|-------|
| Serum potassium, mmol/L         | 1.968 | 1.290-3.030 | 0.002 |
| Creatinine, mg/dL               | 3.570 | 1.610-9.131 | 0.004 |
| eGFR, mL/min/1.73m <sup>2</sup> | 1.001 | 0.987-1.015 | 0.92  |
| Glucose, mg/dL                  | 0.997 | 0.992-1.001 | 0.12  |

Abbreviations: BMI, body mass index; CKD 3, chronic kidney disease stage three; DBP, diastolic blood pressure; eGFR, estimated glomerular filtration rate; IHD, ischemic heart disease; N, number of individuals included in the analysis; SBP, systolic blood pressure.

\*For continuous variables, the odds ratio reflects the effect of a one-unit increase. For example, a one mmHg increase in baseline SBP increases the odds ratio for responder versus non-responder 0.03.

1  
2  
3 Among EA patients, 343 (30.8%) did not respond to spironolactone. EA  
4 responders were heavier and less likely to have IHD. They had higher baseline SBP,  
5 DBP, and serum sodium than nonresponders (**Supplemental Table 4**). EA responders  
6 also had a greater decrease in serum sodium and eGFR and a greater increase in serum  
7 potassium and creatinine after starting spironolactone (**Supplemental Table 4**).  
8  
9

10  
11  
12 Among AA patients, 106 (28.7%) did not respond to spironolactone. Like EA  
13 responders, AA responders had significantly higher baseline SBP and DBP and a greater  
14 decrease in serum sodium and increase in creatinine after starting spironolactone than  
15 nonresponders (**Supplemental Table 5**).  
16  
17  
18  
19  
20  
21  
22  
23  
24  
25

### 26 **Blood pressure response to spironolactone as a continuous variable**

27  
28 For the entire group, the mean decrease in SBP following initiation of  
29 spironolactone was 8.1 mmHg and the mean decrease in DBP was 3.4 mmHg following  
30 initial spironolactone prescription. In total, 933 patients (62.9%) achieved a decrease in  
31 BP to  $\leq 140/90$  mmHg, the pressure goal recommended in guidelines at the time.<sup>17</sup> An  
32 additional 23 patients achieved a decrease in SBP but not DBP to guideline  
33 recommendation and 262 patients achieved DBP but not SBP control. Analyses of BP  
34 change as a continuous variable were performed using a multivariable model that  
35 included all variables except for HbA1c, HDL cholesterol, LDL cholesterol, and  
36 triglycerides, as data were not available in the majority of patients.  
37  
38  
39  
40  
41  
42  
43  
44  
45  
46  
47  
48

49 In the total population, patients with higher baseline SBP, lower baseline  
50 creatinine, and a greater decrease in serum sodium, increase in serum potassium, or  
51 increase in creatinine after starting spironolactone had greater reductions in SBP (**Table 3**)  
52  
53  
54  
55  
56  
57  
58  
59  
60

1  
2  
3 and **Figure 3**). Patients with higher baseline SBP and DBP and a greater decrease in  
4 serum sodium, increase in serum potassium, or increase in creatinine after spironolactone  
5 had greater reductions in DBP (**Table 3**). Older patients and female patients also had  
6 significantly greater reductions in DBP (**Table 3**).  
7  
8  
9  
10  
11  
12  
13  
14  
15  
16  
17  
18  
19  
20  
21  
22  
23  
24  
25  
26  
27  
28  
29  
30  
31  
32  
33  
34  
35  
36  
37  
38  
39  
40  
41  
42  
43  
44  
45  
46  
47  
48  
49  
50  
51  
52  
53  
54  
55  
56  
57  
58  
59  
60

**Table 3. Significant coefficients in multivariable models for change in systolic and diastolic blood pressures.**

|                                   | <b>Associated Variable</b> | <b>Coefficient</b> | <b>95% Confidence Interval</b> | <b>p-value</b> |
|-----------------------------------|----------------------------|--------------------|--------------------------------|----------------|
| <b>Total population (N=1019)</b>  |                            |                    |                                |                |
| Change in SBP                     | Baseline SBP               | -0.415             | -0.475, -0.356                 | < 0.001        |
|                                   | Baseline creatinine        | 3.628              | 0.202, 7.054                   | 0.04           |
|                                   | Change in serum sodium     | 0.701              | 0.338, 1.064                   | < 0.001        |
|                                   | Change in serum potassium  | -3.483             | -5.834, -1.131                 | 0.004          |
|                                   | Change in creatinine       | -5.039             | -8.704, -1.374                 | 0.01           |
| Change in DBP                     | Age                        | -0.141             | -0.196, -0.086                 | < 0.001        |
|                                   | Gender- Male: Female       | 1.390              | 0.170, 2.610                   | 0.03           |
|                                   | Baseline SBP               | -0.045             | -0.080, -0.011                 | 0.01           |
|                                   | Baseline DBP               | -0.379             | -0.436, -0.321                 | < 0.001        |
|                                   | Change in serum sodium     | 0.274              | 0.063, 0.485                   | 0.01           |
|                                   | Change in serum potassium  | -2.042             | -3.413, -0.671                 | 0.004          |
|                                   | Change in creatinine       | -3.979             | -6.116, -1.841                 | < 0.001        |
| <b>European Americans (N=753)</b> |                            |                    |                                |                |
| Change in SBP                     | Baseline SBP               | -0.401             | -0.470, -0.333                 | < 0.001        |
|                                   | Change in serum sodium     | 0.525              | 0.117, 0.933                   | 0.01           |
|                                   | Change in serum potassium  | -3.074             | -5.766, -0.381                 | 0.03           |
|                                   | Change in glucose          | 0.031              | 0.003, 0.059                   | 0.03           |
| Change in DBP                     | Age                        | -0.135             | -0.200, -0.070                 | < 0.001        |
|                                   | Gender, Male: Female       | 1.669              | 0.230, 3.108                   | 0.02           |



|                                  |                           |         |                 |         |
|----------------------------------|---------------------------|---------|-----------------|---------|
|                                  | Baseline SBP              | -0.045  | -0.084, -0.005  | 0.03    |
|                                  | Baseline DBP              | -0.370  | -0.436, -0.303  | < 0.001 |
|                                  | Change in serum potassium | -1.809  | -3.385, -0.232  | 0.03    |
|                                  | Change in creatinine      | -3.328  | -5.772, -0.884  | 0.01    |
| <b>African Americans (N=266)</b> |                           |         |                 |         |
| Change in SBP                    | Baseline SBP              | -0.445  | -0.571, -0.319  | < 0.001 |
|                                  | Baseline creatinine       | 5.572   | 0.017, 11.127   | 0.05    |
|                                  | Change in serum sodium    | 1.338   | 0.517, 2.159    | 0.002   |
|                                  | Change in potassium       | -5.206  | -10.205, -0.207 | 0.04    |
|                                  | Change in creatinine      | -10.923 | -19.456, -2.391 | 0.01    |
| Change in DBP                    | Age                       | -0.156  | -0.265, -0.046  | 0.01    |
|                                  | Baseline DBP              | -0.407  | -0.512, -0.278  | < 0.001 |
|                                  | Change in sodium          | 0.530   | 0.053-1.007     | 0.03    |
|                                  | Change in potassium       | -2.864  | -5.768, 0.039   | 0.05    |
|                                  | Change in creatinine      | -7.370  | -12.326, -2.413 | 0.004   |

Abbreviations: DBP, diastolic blood pressure; N, number of individuals included in the analysis; SBP, systolic blood pressure.

1  
2  
3 In EA alone, a greater decrease in either SBP or DBP was significantly associated  
4 with baseline SBP, as well as increase in serum potassium (**Table 3**). A greater  
5  
6 reductions in SBP was further associated with greater decreases in serum sodium and  
7  
8 glucose (**Table 3**). The change in DBP was also significantly associated with age, sex,  
9  
10 and creatinine (**Table 3**).  
11  
12  
13

14  
15 In AA, greater reductions in SBP and DBP were significantly associated with  
16  
17 greater decreases in serum sodium and increases in serum potassium and creatinine  
18  
19 (**Table 3**). Patients with higher baseline SBP and baseline creatinine had a greater  
20  
21 reduction in SBP, while patients with higher baseline DBP and older age had a greater  
22  
23 reduction in DBP (**Table 3**).  
24  
25  
26  
27  
28  
29  
30  
31  
32  
33  
34  
35  
36  
37  
38  
39  
40  
41  
42  
43  
44  
45  
46  
47  
48  
49  
50  
51  
52  
53  
54  
55  
56  
57  
58  
59  
60

## DISCUSSION

We developed a highly accurate algorithm to define the BP response to spironolactone in patients with aTRH using the EMR. The mean decreases in SBP and DBP for the total study population, 8.1 mmHg and 3.4 mmHg, respectively, are consistent with responses reported in prior clinical trials, such as the PATHWAY-2 trial.<sup>1</sup> In total, 30.3% of patients prescribed spironolactone did not achieve a five mmHg decrease in SBP or two mmHg decrease in DBP in the six months following spironolactone initiation. Higher pretreatment SBP and DBP predicted a greater therapeutic response to spironolactone, measured either as a dichotomous or continuous variable.

In addition using the electronic algorithm, we were able to detect not only the BP response, but also changes in serum sodium, potassium, and creatinine after spironolactone initiation. Regardless of race, the response to spironolactone was associated with a greater decrease in serum sodium and greater increase in serum potassium, consistent with MR antagonism. These changes are also consistent with a decrease in epithelial sodium channel (ENaC) activity. In the present study, however, we are unable to determine if this inadequate BP response is due to inadequate spironolactone dose, spironolactone noncompliance, or non-MR mediated ENaC activation. Further, we found a significant correlation between decreasing BP and increasing creatinine after starting spironolactone in all groups. This correlation is likely a result from hemodynamic effects of BP medications and especially from blocking the renin-angiotensin-aldosterone system (RAAS).<sup>1</sup>

1  
2  
3 Race was not significantly associated with BP response to spironolactone nor  
4 electrolyte changes which suggests spironolactone exerts a consistent BP lowering effect  
5 regardless of race. These findings are supported by those of Nishizaka, et al. who  
6 determined that low-dose spironolactone provided a significant decrease in BP in AA and  
7 EA with resistant hypertension with and without primary aldosteronism.<sup>4</sup>  
8  
9  
10  
11  
12  
13

14 In EA, we also observed a significant correlation between the SBP response and  
15 decreasing glucose; whereas, among those in whom HbA1c was measured before and  
16 after therapy, HbA1c declined in nonresponders but not responders. The latter  
17 observation may reflect the fact that responders had a higher baseline HbA1c than non-  
18 responders. While these findings may suggest a potential benefit to glucose management  
19 from MR antagonism it is important to note that the exact relationship between MR  
20 antagonism and glucose is not perfectly understood. Because our findings, as well as  
21 others, suggest an association between spironolactone use and glucose levels, additional  
22 studies to better characterize this relationship are warranted.  
23  
24  
25  
26  
27  
28  
29  
30  
31  
32  
33  
34

35 A limitation of this study and many other studies of aTRH is the inability to  
36 measure adherence directly in the patients prescribed spironolactone without measuring  
37 drug levels, which is not routinely done in clinical practice. Nonadherence alone does  
38 not likely explain the lack of BP response in nonresponders, however. First, patients  
39 nonadherent to spironolactone would likely be nonadherent to other medications.  
40 Nonadherent patients, therefore, would be expected to have higher baseline BPs than  
41 adherent patients. To the contrary, we found that nonresponders had lower baseline SBP  
42 and DBP than responders and baseline SBP and DBP significantly predicted BP  
43 response. In addition, initiation of spironolactone resulted in an increase in serum  
44  
45  
46  
47  
48  
49  
50  
51  
52  
53  
54  
55  
56  
57  
58  
59  
60

1  
2  
3 potassium and decrease in serum sodium in non-responders as well as responders, albeit  
4  
5 to a lesser degree. Taken together these findings suggest that nonadherence is not the  
6  
7 predominant driver of the lack of BP response in non-responders.  
8  
9

10 Another way to assess adequacy of spironolactone dose is to assess whether renin  
11  
12 activity remains suppressed. Unfortunately, an insufficient number of patients had renin  
13  
14 measured during the baseline and response periods to assess change in renin  
15  
16 concentration or activity. The limited number of renin measurements in the EMR is  
17  
18 reflective of poor screening rates for primary aldosteronism.<sup>18</sup> Previous studies have  
19  
20 reported limited value in the addition of aldosterone levels or the ARR to prediction  
21  
22 models of BP response to MR antagonism in aTRH, however.<sup>19,20</sup>  
23  
24  
25

26 Other limitations of the study include the exclusion of a significant number of  
27  
28 patients with aTRH due to inadequate documentation of pre- and post-treatment BPs,  
29  
30 which limits our power of detection for some responses. The relatively small number of  
31  
32 AA, for example, limits the power to detect predictors of response to spironolactone in  
33  
34 this group.  
35  
36  
37

38 In conclusion, we have developed a highly accurate algorithm for the assessment  
39  
40 of BP response to spironolactone, a commonly prescribed medication, in patients with  
41  
42 aTRH using EMR. Electrolyte changes associated with the BP response to spironolactone  
43  
44 are consistent with its mechanism of action to block the MR and decrease activity of  
45  
46 ENaC. A strength of this algorithm is its applicability to evaluate BP and electrolyte  
47  
48 responses to medications other than spironolactone as well as its utility to evaluate the  
49  
50 long-term clinical consequences of medication use. Further, this electronic algorithm  
51  
52 could be amended for use in other EMR systems.  
53  
54  
55  
56  
57  
58  
59  
60

1  
2  
3  
4  
5  
6  
7  
8  
9  
10  
11  
12  
13  
14  
15  
16  
17  
18  
19  
20  
21  
22  
23  
24  
25  
26  
27  
28  
29  
30  
31  
32  
33  
34  
35  
36  
37  
38  
39  
40  
41  
42  
43  
44  
45  
46  
47  
48  
49  
50  
51  
52  
53  
54  
55  
56  
57  
58  
59  
60

**ACKNOWLEDGEMENTS**

None

For peer review only

## SOURCES OF FUNDING

This study was supported by the National Institutes of Health (DK108444-01A1). The dataset used for the analyses described were obtained from the Vanderbilt University Medical Center Synthetic Derivative, which is supported by institutional funding, the 1S10RR025141-01 instrumentation award, and by the CTSA grant UL1TR000445 from National Center for Advancing Translational Sciences/National Institutes of Health.

1  
2  
3  
4  
5  
6  
7  
8  
9  
10  
11  
12  
13  
14  
15  
16  
17  
18  
19  
20  
21  
22  
23  
24  
25  
26  
27  
28  
29  
30  
31  
32  
33  
34  
35  
36  
37  
38  
39  
40  
41  
42  
43  
44  
45  
46  
47  
48  
49  
50  
51  
52  
53  
54  
55  
56  
57  
58  
59  
60

**DISCLOSURES**

None

For peer review only



## REFERENCES

1. Williams B, MacDonald TM, Morant S, Webb DJ, Sever P, McInnes G, Ford I, Cruickshank JK, Caulfield MJ, Salsbury J, Mackenzie I, Padmanabhan S, Brown MJ, British Hypertension Society's PSG. Spironolactone versus placebo, bisoprolol, and doxazosin to determine the optimal treatment for drug-resistant hypertension (PATHWAY-2): A randomised, double-blind, crossover trial. *Lancet*. 2015;386:2059-2068. doi:10.1016/S0140-6736(15)00257-3
2. Chapman N, Dobson J, Wilson S, Dahlof B, Sever PS, Wedel H, Poulter NR, Anglo-Scandinavian Cardiac Outcomes Trial I. Effect of spironolactone on blood pressure in subjects with resistant hypertension. *Hypertension*. 2007;49:839-845. doi:10.1161/01.HYP.0000259805.18468.8c
3. de Souza F, Muxfeldt E, Fiszman R, Salles G. Efficacy of spironolactone therapy in patients with true resistant hypertension. *Hypertension*. 2010;55:147-152. doi:10.1161/HYPERTENSIONAHA.109.140988
4. Nishizaka MK, Zaman MA, Calhoun DA. Efficacy of low-dose spironolactone in subjects with resistant hypertension. *Am J Hypertens*. 2003;16:925-930.
5. Saha C, Eckert GJ, Ambrosius WT, Chun TY, Wagner MA, Zhao Q, Pratt JH. Improvement in blood pressure with inhibition of the epithelial sodium channel in blacks with hypertension. *Hypertension*. 2005;46:481-487. doi:10.1161/01.HYP.0000179582.42830.1d
6. Shuey MM, Gandelman JS, Chung CP, Nian H, Yu C, Denny JC, Brown NJ. Characteristics and treatment of African-American and European-American

- 1  
2  
3 patients with resistant hypertension identified using the electronic health record in  
4 an academic health centre: A case-control study. *BMJ Open*.  
5  
6 2018;0doi:10.1136/bmjopen-2018-021640  
7  
8  
9  
10 7. Roden DM, Pulley JM, Basford MA, Bernard GR, Clayton EW, Balsler JR, Masys  
11 DR. Development of a large-scale de-identified DNA biobank to enable  
12 personalized medicine. *Clin Pharmacol Ther*. 2008;84:362-369.  
13  
14 doi:10.1038/clpt.2008.89  
15  
16  
17  
18  
19 8. Stenner SP, Doan S, Johnson KB, Waitman LA, Denny JC. Medex: A medication  
20 information extraction system for clinical narratives. *J Am Med Inform Assoc*.  
21  
22 2010;17:19-24.  
23  
24  
25  
26 9. Xu H, Doan S, Birdwell KA, Cowan JD, Vincz AJ, Haas DW, Basford MA,  
27 Denny JC. An automated approach to calculating the daily dose of tacrolimus in  
28 electronic health records. *AMIA Jt Summits Transl Sci Proc*. 2010;2010:71-75.  
29  
30  
31  
32  
33 10. Xu H, Jiang M, Oetjens M, Bowton EA, Ramirez AH, Jeff JM, Basford MA,  
34 Pulley JM, Cowan JD, Wang X, Ritchie MD, Masys DR, Roden DM, Crawford  
35 DC, Denny JC. Facilitating pharmacogenetic studies using electronic health  
36 records and natural-language processing: A case study of warfarin. *J Am Med*  
37  
38 *Inform Assoc*. 2011;18:387-391. doi:10.1136/amiajnl-2011-000208  
39  
40  
41  
42  
43  
44 11. Levey AS, Bosch JP, Lewis JB, Greene T, Rogers N, Roth D. A more accurate  
45 method to estimate glomerular filtration rate from serum creatinine: A new  
46 prediction equation. Modification of diet in renal disease study group. *Ann Intern*  
47  
48 *Med*. 1999;130:461-470.  
49  
50  
51  
52  
53  
54  
55  
56  
57  
58  
59  
60

- 1  
2  
3  
4  
5  
6  
7  
8  
9  
10  
11  
12  
13  
14  
15  
16  
17  
18  
19  
20  
21  
22  
23  
24  
25  
26  
27  
28  
29  
30  
31  
32  
33  
34  
35  
36  
37  
38  
39  
40  
41  
42  
43  
44  
45  
46  
47  
48  
49  
50  
51  
52  
53  
54  
55  
56  
57  
58  
59  
60
12. Tang H, Quertermous T, Rodriguez B, Kardia SL, Zhu X, Brown A, Pankow JS, Province MA, Hunt SC, Boerwinkle E, Schork NJ, Risch NJ. Genetic structure, self-identified race/ethnicity, and confounding in case-control association studies. *Am J Hum Genet.* 2005;76:268-275. doi:10.1086/427888
  13. Dumitrescu L, Ritchie MD, Brown-Gentry K, Pulley JM, Basford M, Denny JC, Oksenberg JR, Roden DM, Haines JL, Crawford DC. Assessing the accuracy of observer-reported ancestry in a biorepository linked to electronic medical records. *Genet Med.* 2010;12:648-650. doi:10.1097/GIM.0b013e3181efe2df
  14. Birdwell KA, Grady B, Choi L, Xu H, Bian A, Denny JC, Jiang M, Vranic G, Basford M, Cowan JD, Richardson DM, Robinson MP, Ikizler TA, Ritchie MD, Stein CM, Haas DW. The use of a DNA biobank linked to electronic medical records to characterize pharmacogenomic predictors of tacrolimus dose requirement in kidney transplant recipients. *Pharmacogenet Genomics.* 2012;22:32-42. doi:10.1097/FPC.0b013e32834e1641
  15. Speltz P, Rasmussen LV, Basford M, Gottesman O, Peissig PL, Pacheco JA, Tromp G, Pathak J, Carrell DS, Ellis SB, Lingren T, Thompson WK, Savova G, Haines J, Roden DM, Harris PA, Denny JC. Phekb: A catalog and workflow for creating electronic phenotype algorithms for transportability. *J Am Med Inform Assoc.* 2016;23:1046-1052.
  16. Team RC. R: A language and environment for statistical computing [internet]. Vienna, austria; 2014. 2017

- 1  
2  
3 17. Chobanian, Aram V., et al. "The seventh report of the joint national committee on  
4 prevention, detection, evaluation, and treatment of high blood pressure: the JNC 7  
5 report." *JAMA* 2003; 289(19), 2560-2571. doi:10.1001/jama.289.19.2560  
6  
7  
8  
9
- 10 18. Ruhle BC, White MG, Alsafran S, Kaplan EL, Angelos P, Grogan RH. Keeping  
11 primary aldosteronism in mind: Deficiencies in screening at-risk hypertensives.  
12 *Surgery*. 2019;165:221-227. doi:10.1016/j.surg.2018.05.085  
13  
14  
15
- 16 19. Parthasarathy HK, Alhashmi K, McMahon AD, Struthers AD, McInnes GT, Ford  
17 I, Connell JM, MacDonald TM. Does the ratio of serum aldosterone to plasma  
18 renin activity predict the efficacy of diuretics in hypertension? Results of  
19 RENALDO. *J Hypertens*. 2010;28:170-177.  
20  
21  
22  
23  
24  
25  
26  
27  
28  
29  
30  
31  
32  
33  
34  
35  
36  
37  
38  
39  
40  
41  
42  
43  
44  
45  
46  
47  
48  
49  
50  
51  
52  
53  
54  
55  
56  
57  
58  
59  
60
20. Vaclavik J, Sedlak R, Jarkovsky J, Kocianova E, Taborsky M. Effect of  
spironolactone in resistant arterial hypertension: A randomized, double-blind,  
placebo-controlled trial (ASPIRANT-EXT)). *Medicine (Baltimore)*.  
2014;93:e162. doi:10.1097/MD.0000000000000162

## FIGURE LEGENDS

**Figure 1. Schematic of the spironolactone response algorithm and identification of the baseline and response periods for patients.** The earliest date a patient was prescribed spironolactone is indicated by the novel start date (NSD). The baseline period is determined by identifying all visits in which same three medication classes as prescribed to the patient as on the NSD. If the visit date for the start of the baseline period occurred more than six months before the NSD a baseline period of six months was used. The determination of the response period is not shown in the schematic above. Similar logic was applied to the selection of this period.

**Figure 2. Diagram of the algorithm for the identification of patients with apparent therapy-resistant hypertension (aTRH) in the VUMC Synthetic Derivative (SD) prescribed spironolactone during a period of stable medication use for the evaluation of blood pressure response.**

**Figure 3. The significant correlations with systolic blood pressure change in the total population.** Correlation between the change in systolic blood pressure (SBP) after starting spironolactone and baseline A) SBP [correlation coefficient (CC)= -0.415,  $p < 0.001$ ], and the change in B) creatinine (CC= -5.039,  $p = 0.01$ ), C) serum sodium (CC= 0.701,  $p < 0.001$ ), and D) serum potassium (CC= -3.483,  $p = 0.004$ ).

## STATEMENTS

### Contributorship

MMS and NJB contributed to the design of the study; MMS, BP, HN, CY, JML, and NJB contributed to the analysis and interpretation of the results; MMS and NJB contributed to the drafting of the manuscript; MMS, BP, HN, CY, JML, and NJB contributed to the editing of the manuscript and final approval for submission

### Competing Interests

All authors have completed the ICMJE uniform disclosure form at [www.icmje.org/coi\\_disclosure.pdf](http://www.icmje.org/coi_disclosure.pdf) and declare: Dr Brown reports consulting for Shire HGT, Novartis Pharmaceuticals, Viamet Pharmaceuticals and serving on the Scientific Advisory Board of Alnylam Pharmaceuticals. Dr. Brown also sits on the Joint Scientific Committee for the Vanderbilt Bayer Alliance. All authors report no support from any organization for the submitted work; no financial relationships with any organizations that might have an interest in the submitted work in the previous three years; no other relationships or activities that could appear to have influenced the submitted work.

### Patient Consent

No identifiable patient data was used in the study.

### Ethical Approval

1  
2  
3 The study was approved by the Vanderbilt University Medical Center Institutional  
4  
5 Review Board (#130848).  
6  
7  
8  
9

### 10 **Transparency Declaration**

11  
12 M. Shuey affirms that the manuscript is an honest, accurate, and transparent account of  
13  
14 the study being reported; that no important aspects of the study have been omitted; and  
15  
16 that any discrepancies from the study as planned (and, if relevant, registered) have been  
17  
18 explained.  
19  
20  
21  
22  
23

### 24 **Data Sharing**

25  
26 The full data set is available upon request to the corresponding author.  
27  
28  
29  
30  
31  
32  
33  
34  
35  
36  
37  
38  
39  
40  
41  
42  
43  
44  
45  
46  
47  
48  
49  
50  
51  
52  
53  
54  
55  
56  
57  
58  
59  
60





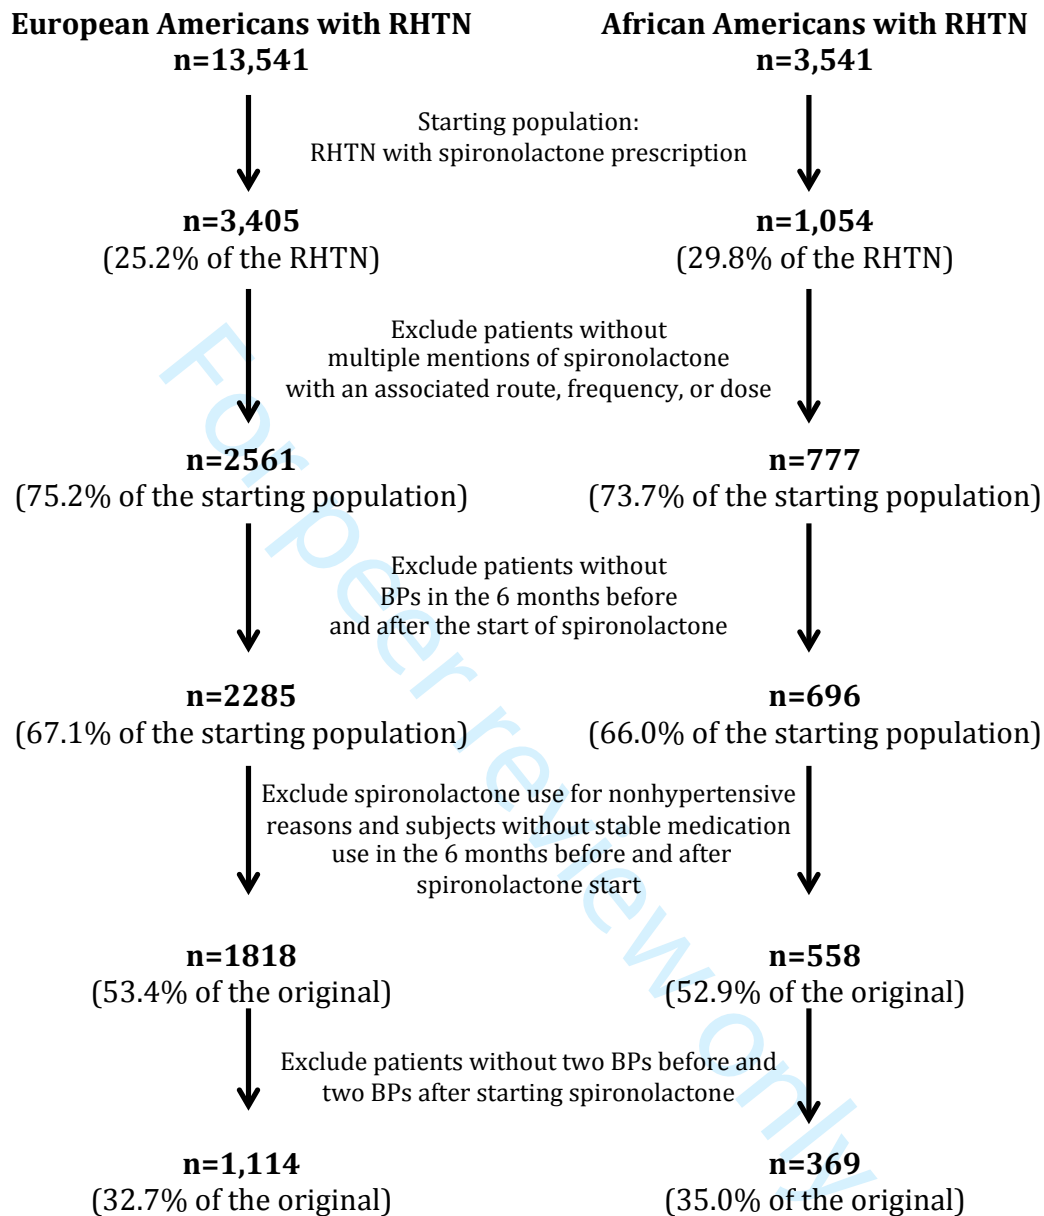

1  
2  
3  
4  
5  
6  
7  
8  
9  
10  
11  
12  
13  
14  
15  
16  
17  
18  
19  
20  
21  
22  
23  
24  
25  
26  
27  
28  
29  
30  
31  
32  
33  
34  
35  
36  
37  
38  
39  
40  
41  
42  
43  
44  
45  
46  
47  
48  
49  
50  
51  
52  
53  
54  
55  
56  
57  
58  
59  
60

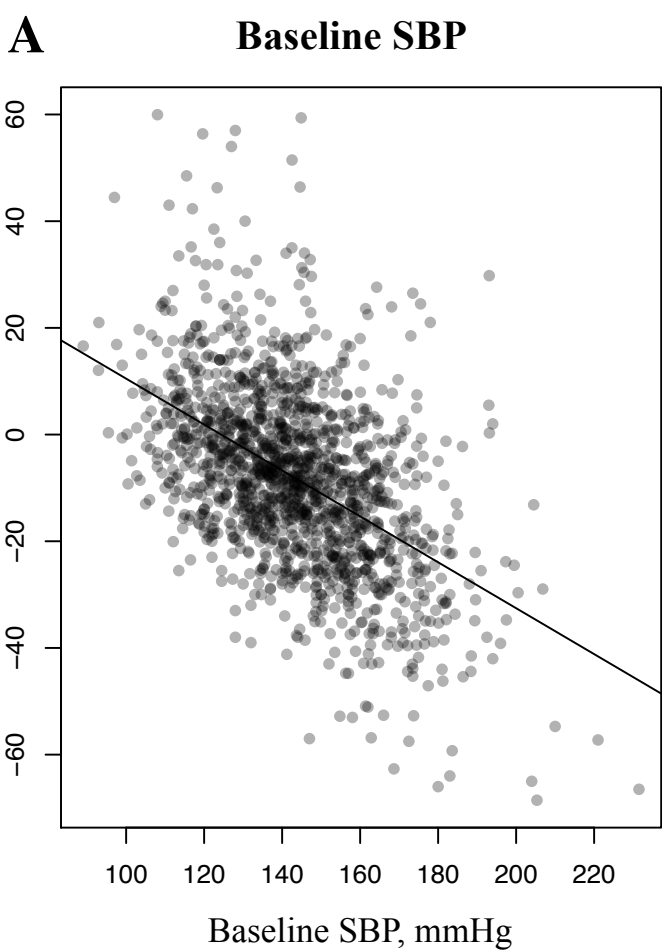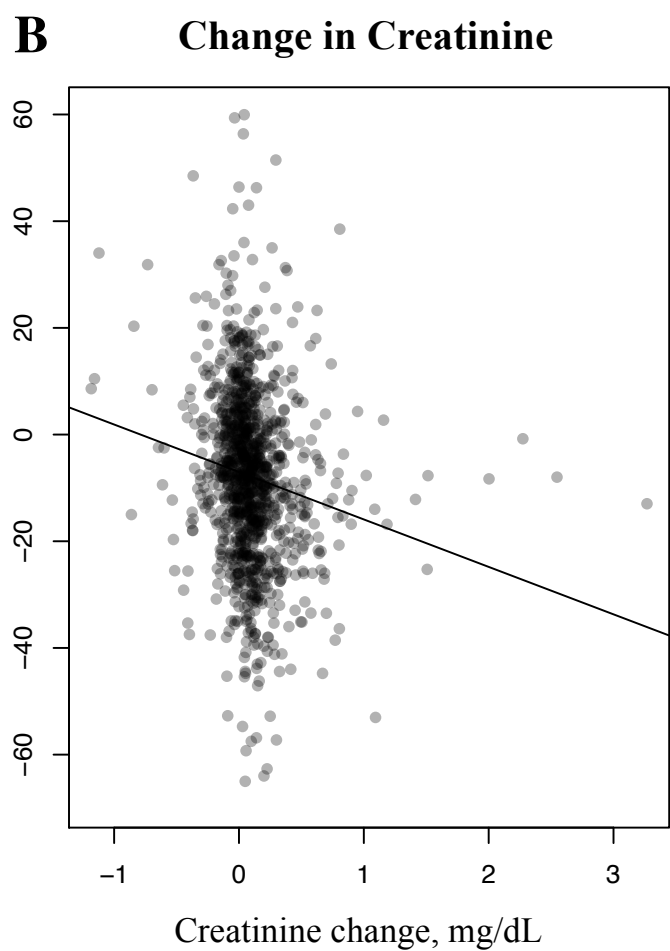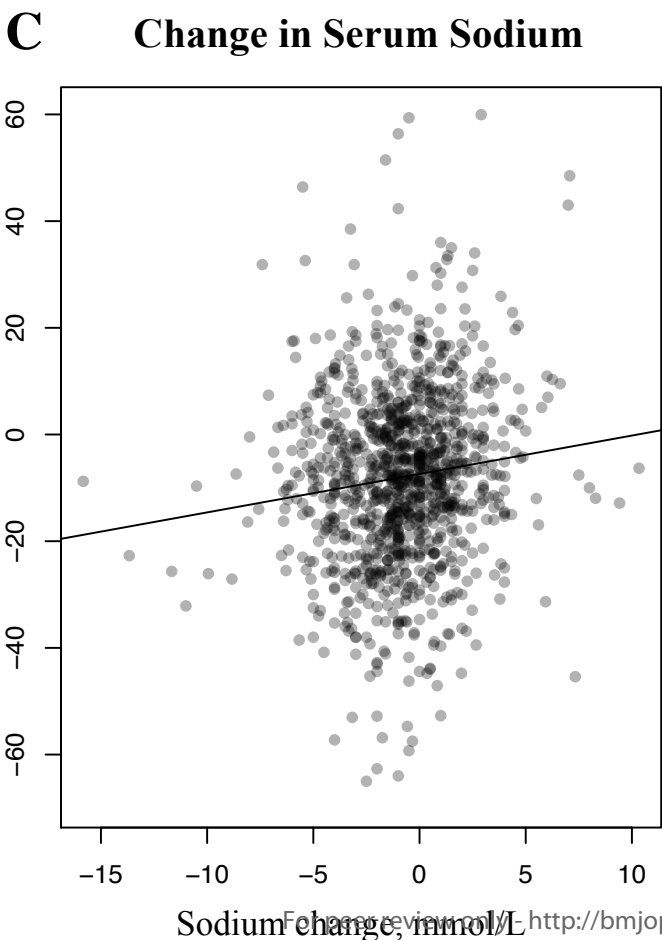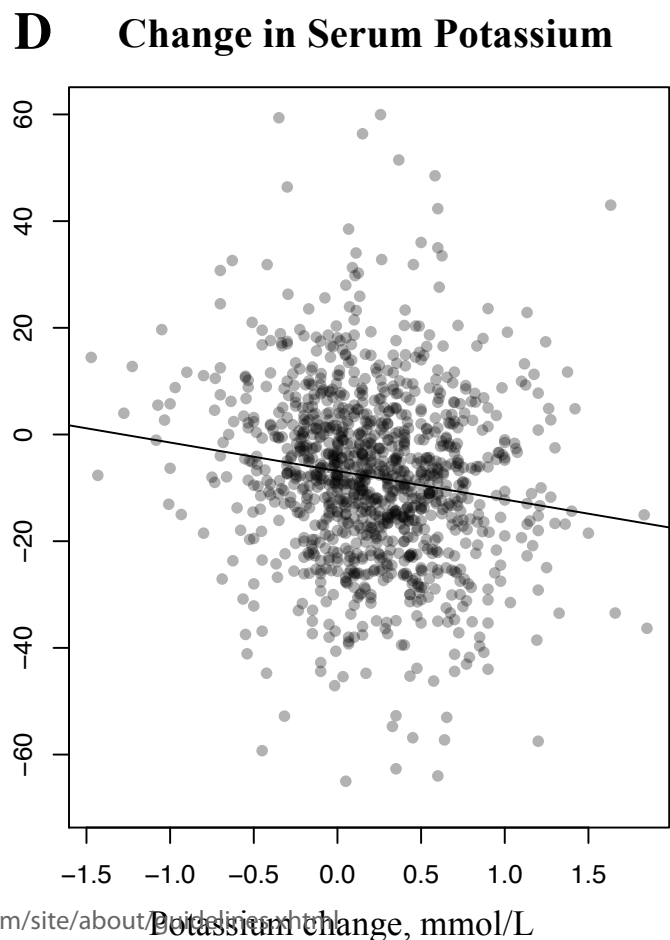

## DATA SUPPLEMENT

Supplemental Table 1. International Classifiers of Disease (ICD)-9 and -10 exclusions for resistant hypertensive subjects

| Description                                                                                                                              | ICD-9-CM codes                                   | ICD-10-CM-codes                                 |
|------------------------------------------------------------------------------------------------------------------------------------------|--------------------------------------------------|-------------------------------------------------|
| <i>Exclusion for Case Type I, Case Type II, and Control if ever present in a patient record</i>                                          |                                                  |                                                 |
| Malignant neoplasm of unspecified adrenal gland                                                                                          | 194.0                                            | C74.9                                           |
| Benign neoplasm of unspecified adrenal gland                                                                                             | 227.0                                            | D35.00                                          |
| Disorders of the adrenal gland (excluding adrenal insufficiencies)                                                                       | 255.0, 255.1*, 255.2, 255.3, 255.6, 255.8, 255.9 | E24.*, E26.*, E25.*, E27.0, E27.5, E27.8, E27.9 |
| Secondary Hypertension                                                                                                                   | 405.*                                            | I15.0, I15.8                                    |
| Chronic pulmonary heart disease                                                                                                          | 416.*                                            | I27.*                                           |
| Nephrotic syndrome                                                                                                                       | 581.*                                            | N04.*, N08                                      |
| Chronic glomerulonephritis                                                                                                               | 582.*                                            | N03.*, N08                                      |
| Bulbus cordis anomalies                                                                                                                  | 745.*                                            | Q20.*, Q21.*                                    |
| Coarctation of aorta                                                                                                                     | 747.1*                                           | Q25.1, Q25.2                                    |
| <i>Exclusion for Case Type I and Case Type II if present in a patient record 5 years before or 1 year after identification as a Case</i> |                                                  |                                                 |
| Thyrotoxicosis                                                                                                                           | 242.*                                            | E05.*                                           |
| Disorder of thyrocalcitonin secretion                                                                                                    | 246.0                                            | E07.0                                           |
| Disorders of the thyroid NEC                                                                                                             | 246.8                                            | E03.4, E07.89                                   |
| Disorders of the thyroid NOS                                                                                                             | 246.9                                            | E07.9                                           |
| Parathyroid disorder NEC                                                                                                                 | 252.8                                            | E21.4                                           |
| Parathyroid disorder NOS                                                                                                                 | 252.9                                            | E21.5                                           |
| Obstructive uropathy                                                                                                                     | 599.6*                                           | N13.9                                           |

Abbreviations: NEC, not elsewhere classified; NOS, not otherwise classified

1  
2 **Supplemental Table 2. International Classifiers of Disease (ICD)-9 and ICD-10**  
3  
4 **codes used for history of diagnosis**  
5

| 6 <b>Diagnosis</b> | <b>ICD-9 codes</b>             | <b>ICD-10 codes</b> | <b>Other</b> |                                      |
|--------------------|--------------------------------|---------------------|--------------|--------------------------------------|
| 7                  |                                |                     |              |                                      |
| 8                  |                                |                     |              |                                      |
| 9                  | Chronic kidney disease stage 3 | 585.1               | N18.1        | eGFR > 30 mL/min/1.73 m <sup>2</sup> |
| 10                 |                                | 585.2               | N18.2        | but < 60 mL/min/1.73 m <sup>2</sup>  |
| 11                 |                                |                     |              |                                      |
| 12                 |                                |                     |              |                                      |
| 13                 | Ischemic heart disease         | 410.*               | I20.*        |                                      |
| 14                 |                                | 411.*               | I22.*        |                                      |
| 15                 |                                | 413.*               | I24.*        |                                      |
| 16                 |                                | 414.*               | I25.*        |                                      |
| 17                 |                                |                     |              |                                      |
| 18                 |                                |                     |              |                                      |
| 19                 |                                |                     |              |                                      |
| 20                 | Type 2 diabetes mellitus       | 250                 | E11          |                                      |
| 21                 |                                | 250.*               | E11.*        |                                      |
| 22                 |                                | 327.2*              | G47.3*       |                                      |
| 23                 |                                |                     |              |                                      |
| 24                 |                                |                     |              |                                      |
| 25                 |                                |                     |              |                                      |
| 26                 |                                |                     |              |                                      |
| 27                 |                                |                     |              |                                      |
| 28                 |                                |                     |              |                                      |
| 29                 | Smoking                        | 305.1               | F17.*        |                                      |
| 30                 |                                | V15.82              | Z87.891      |                                      |
| 31                 |                                |                     |              |                                      |
| 32                 |                                |                     |              |                                      |
| 33                 |                                |                     |              |                                      |

34 Abbreviations: eGFR, estimated glomerular filtration rate  
35  
36  
37  
38  
39  
40  
41  
42  
43  
44  
45  
46  
47  
48  
49  
50  
51  
52  
53  
54  
55  
56  
57  
58  
59  
60

**Supplemental Table 3. The daily dose and frequency of thiazide diuretic and dihydropyridine calcium channel blocker prescription in patients with apparent treatment-resistant hypertension prior to spironolactone prescription**

| Medication                              | Daily dose | Patients prescribed, n (%) <sup>*</sup> |
|-----------------------------------------|------------|-----------------------------------------|
| Thiazide diuretic                       |            | 884                                     |
|                                         | 12.5 mg    | 86 (9.7)                                |
|                                         | 25 mg      | 566 (64.0)                              |
|                                         | 50 mg      | 78 (8.8)                                |
|                                         | unknown    | 154 (17.4)                              |
| Dihydropyridine calcium channel blocker |            | 980                                     |
| Amlodipine                              |            |                                         |
|                                         | 2.5 mg     | 8 (0.8)                                 |
|                                         | 5 mg       | 99 (10.1)                               |
|                                         | 7.5 mg     | 3 (0.3)                                 |
|                                         | 10 mg      | 312 (31.8)                              |
|                                         | unknown    | 52 (5.3)                                |
| Nifedipine                              |            |                                         |
|                                         | 30 mg      | 38 (3.9)                                |
|                                         | 60 mg      | 100 (10.2)                              |
|                                         | 90 mg      | 110 (11.2)                              |
|                                         | 120 mg     | 25 (2.6)                                |
|                                         | unknown    | 233 (23.8)                              |

<sup>\*</sup>The frequency of medication dose based on medication type, e.g. thiazide diuretic or dihydropyridine calcium channel blocker.

**Supplemental Table 4. Characteristics of spironolactone responders and nonresponders in****European Americans.**

| Variable                                                               | N     | Nonresponders<br>(n=343) | Responders<br>(n=771) | p-value* |
|------------------------------------------------------------------------|-------|--------------------------|-----------------------|----------|
| Age, years                                                             | 1,114 | 65.66 ± 13.09            | 66.21 ± 12.04         | 0.50     |
| Female, n (%)                                                          | 1,114 | 151 (44.0%)              | 368 (47.7%)           | 0.25     |
| BMI, kg/m <sup>2</sup>                                                 | 1,023 | 31.3 ± 7.2               | 32.5 ± 7.7            | 0.01     |
| Diagnostic History                                                     |       |                          |                       |          |
| T2DM, n (%)                                                            | 1,114 | 173 (50.4%)              | 393 (51.0%)           | 0.87     |
| CKD3, n (%)                                                            | 1,114 | 124 (36.2%)              | 296 (38.4%)           | 0.48     |
| IHD, n (%)                                                             | 1,114 | 149 (43.4%)              | 280 (36.3%)           | 0.02     |
| Smoking, n (%)                                                         | 1,114 | 75 (21.9%)               | 157 (20.4%)           | 0.57     |
| Baseline measures                                                      |       |                          |                       |          |
| SBP, mmHg                                                              | 1,114 | 131.37 ± 16.99           | 145.91 ± 18.52        | < 0.001  |
| DBP, mmHg                                                              | 1,114 | 69.46 ± 10.88            | 76.78 ± 12.52         | < 0.001  |
| Serum sodium, mmol/L                                                   | 872   | 138.45 ± 3.26            | 139.04 ± 3.00         | 0.01     |
| Serum potassium, mmol/L                                                | 871   | 3.99 ± 0.46              | 3.93 ± 0.43           | 0.07     |
| Creatinine, mg/dL                                                      | 878   | 1.11 ± 0.37              | 1.07 ± 0.37           | 0.11     |
| eGFR, mL/min/1.73m <sup>2</sup>                                        | 1,029 | 75.16 ± 24.47            | 75.23 ± 19.83         | 0.96     |
| Glucose, mg/dL                                                         | 875   | 124.46 ± 56.69           | 126.59 ± 48.81        | 0.57     |
| HbA1c, %                                                               | 383   | 6.76 ± 1.67              | 7.24 ± 3.54           | 0.10     |
| HDL cholesterol, mg/dL                                                 | 420   | 46.96 ± 18.89            | 44.11 ± 14.83         | 0.10     |
| LDL cholesterol, mg/dL                                                 | 390   | 92.09 ± 37.86            | 95.30 ± 34.75         | 0.43     |
| Triglycerides, mg/dL                                                   | 426   | 167.8 ± 117.0            | 182.5 ± 129.4         | 0.27     |
| Difference from baseline following initial spironolactone prescription |       |                          |                       |          |
| Serum sodium, mmol/L                                                   | 810   | -0.70 ± 2.63             | -1.12 ± 2.71          | 0.04     |

|    |                                 |     |                 |                 |         |
|----|---------------------------------|-----|-----------------|-----------------|---------|
| 1  | Serum potassium, mmol/L         | 812 | 0.12 ± 0.48     | 0.27 ± 0.43     | < 0.001 |
| 2  |                                 |     |                 |                 |         |
| 3  | Creatinine, mg/dL               | 816 | 0.01 ± 0.23     | 0.13 ± 0.32     | < 0.001 |
| 4  |                                 |     |                 |                 |         |
| 5  | eGFR, mL/min/1.73m <sup>2</sup> | 924 | -4.82 ± 15.68   | -8.76 ± 14.51   | < 0.001 |
| 6  |                                 |     |                 |                 |         |
| 7  | Glucose, mg/dL                  | 810 | 1.44 ± 47.52    | 0.01 ± 39.03    | 0.65    |
| 8  |                                 |     |                 |                 |         |
| 9  | HbA1c, %                        | 181 | -0.13 ± 1.31    | -0.05 ± 0.92    | 0.63    |
| 10 |                                 |     |                 |                 |         |
| 11 | HDL cholesterol, mg/dL          | 156 | 0.03 ± 9.35     | -0.94 ± 8.62    | 0.54    |
| 12 |                                 |     |                 |                 |         |
| 13 | LDL cholesterol, mg/dL          | 142 | -7.29 ± 35.21   | -8.63 ± 35.09   | 0.86    |
| 14 |                                 |     |                 |                 |         |
| 15 | Triglycerides, mg/dL            | 162 | -11.99 ± 107.79 | -22.93 ± 121.66 | 0.59    |
| 16 |                                 |     |                 |                 |         |
| 17 |                                 |     |                 |                 |         |
| 18 | <hr/>                           |     |                 |                 |         |

19

20 Abbreviations: BMI, body mass index; CKD 3, chronic kidney disease stage three; DBP, diastolic

21 blood pressure; eGFR, estimated glomerular filtration rate; HbA1c, hemoglobin A1c; HDL,

22 high-density lipoprotein; IHD, ischemic heart disease; LDL, low-density lipoprotein; N, number of

23 individuals with the specific measure; SBP, systolic blood pressure.

24

25 Data are presented as mean ± standard deviation for continuous variables and count (%) for

26 categorical variables.

27

28 \* P-values from the multivariable regression model are provided for all variables except HbA1c,

29 HDL cholesterol, LDL cholesterol, and triglycerides. Univariate p-values are provided for these

30 variables.

31

32

33

34

35

36

37

38

39

40

41

42

43

44

45

46

47

48

49

50

51

52

53

54

55

56

57

58

59

60

**Supplemental Table 5. Characteristics of spironolactone responders and nonresponders in African Americans.**

| Variable                        | N   | Nonresponders<br>(n=106) | Responders<br>(n=263) | p-value* |
|---------------------------------|-----|--------------------------|-----------------------|----------|
| Age, years                      | 369 | 57.23 ± 11.30            | 58.65 ± 12.64         | 0.32     |
| Female, n (%)                   | 369 | 64 (60.3%)               | 164 (62.4%)           | 0.72     |
| BMI, kg/m <sup>2</sup>          | 335 | 35.3 ± 9.7               | 37.3 ± 9.2            | 0.40     |
| Diagnostic History              |     |                          |                       |          |
| T2DM, n (%)                     | 369 | 63 (59.4%)               | 173 (65.7%)           | 0.25     |
| CKD3, n (%)                     | 369 | 39 (36.8%)               | 102 (38.8%)           | 0.72     |
| IHD, n (%)                      | 369 | 30 (28.3%)               | 71 (27.0%)            | 0.80     |
| Smoking, n (%)                  | 369 | 21 (19.8%)               | 211 (20.5%)           | 0.87     |
| Baseline measures               |     |                          |                       |          |
| SBP, mmHg                       | 369 | 139.15 ± 17.46           | 152.51 ± 18.40        | < 0.001  |
| DBP, mmHg                       | 369 | 78.78 ± 11.67            | 85.50 ± 12.53         | < 0.001  |
| Serum sodium, mmol/L            | 304 | 139.37 ± 3.00            | 139.81 ± 2.85         | 0.23     |
| Serum potassium, mmol/L         | 304 | 3.81 ± 0.50              | 3.84 ± 0.44           | 0.58     |
| Creatinine, mg/dL               | 306 | 1.14 ± 0.33              | 1.16 ± 0.54           | 0.73     |
| eGFR, mL/min/1.73m <sup>2</sup> | 353 | 81.69 ± 20.78            | 83.42 ± 22.80         | 0.51     |
| Glucose, mg/dL                  | 304 | 129.05 ± 64.32           | 128.05 ± 55.37        | 0.89     |
| HbA1c, %                        | 155 | 7.45 ± 2.17              | 7.22 ± 1.65           | 0.50     |
| HDL cholesterol, mg/dL          | 155 | 49.07 ± 14.93            | 49.21 ± 15.95         | 0.56     |
| LDL cholesterol, mg/dL          | 147 | 106.51 ± 43.81           | 106.70 ± 33.43        | 0.98     |



|                                                                        |     |                 |                |      |
|------------------------------------------------------------------------|-----|-----------------|----------------|------|
| Triglycerides, mg/dL                                                   | 152 | 151.35 ± 92.16  | 135.01 ± 88.22 | 0.34 |
| Difference from baseline following initial spironolactone prescription |     |                 |                |      |
| Serum sodium, mmol/L                                                   | 291 | 0.17 ± 2.52     | -0.52 ± 2.63   | 0.05 |
| Serum potassium, mmol/L                                                | 292 | 0.16 ± 0.50     | 0.19 ± 0.39    | 0.57 |
| Creatinine, mg/dL                                                      | 292 | 0.06 ± 0.23     | 0.14 ± 0.26    | 0.01 |
| eGFR, mL/min/1.73m <sup>2</sup>                                        | 330 | -6.50 ± 15.89   | -9.99 ± 16.61  | 0.09 |
| Glucose, mg/dL                                                         | 291 | -5.56 ± 48.63   | -1.37 ± 44.65  | 0.48 |
| HbA1c, %                                                               | 103 | -0.54 ± 0.97    | 0.02 ± 1.23    | 0.09 |
| HDL cholesterol, mg/dL                                                 | 58  | 3.17 ± 17.66    | -1.67 ± 10.92  | 0.24 |
| LDL cholesterol, mg/dL                                                 | 55  | 0.04 ± 19.86    | -4.82 ± 34.85  | 0.65 |
| Triglycerides, mg/dL                                                   | 58  | -43.47 ± 109.99 | -11.64 ± 61.01 | 0.21 |

Abbreviations: BMI, body mass index; CKD 3, chronic kidney disease stage three; DBP, diastolic blood pressure; eGFR, estimated glomerular filtration rate; HbA1c, hemoglobin A1c; HDL, high-density lipoprotein; IHD, ischemic heart disease; LDL, low-density lipoprotein; N, number of individuals with the specific measure; SBP, systolic blood pressure.

Data are presented as mean ± standard deviation for continuous variables and count (%) for categorical variables.

\* P-values from the multivariable regression model are provided for all variables except HbA1c, HDL cholesterol, LDL cholesterol, and triglycerides. Univariate p-values are provided for these variables.

**STROBE 2007 (v4) Statement—Checklist of items that should be included in reports of *cohort studies***

| Section/Topic                | Item # | Recommendation                                                                                                                                                                       | Reported on page #         |
|------------------------------|--------|--------------------------------------------------------------------------------------------------------------------------------------------------------------------------------------|----------------------------|
| <b>Title and abstract</b>    | 1      | (a) Indicate the study's design with a commonly used term in the title or the abstract                                                                                               | 1,2                        |
|                              |        | (b) Provide in the abstract an informative and balanced summary of what was done and what was found                                                                                  | 2,3                        |
| <b>Introduction</b>          |        |                                                                                                                                                                                      |                            |
| Background/rationale         | 2      | Explain the scientific background and rationale for the investigation being reported                                                                                                 | 5                          |
| Objectives                   | 3      | State specific objectives, including any prespecified hypotheses                                                                                                                     | 5                          |
| <b>Methods</b>               |        |                                                                                                                                                                                      |                            |
| Study design                 | 4      | Present key elements of study design early in the paper                                                                                                                              | 5-6, 7                     |
| Setting                      | 5      | Describe the setting, locations, and relevant dates, including periods of recruitment, exposure, follow-up, and data collection                                                      | 7                          |
| Participants                 | 6      | (a) Give the eligibility criteria, and the sources and methods of selection of participants. Describe methods of follow-up                                                           | 7-11                       |
|                              |        | (b) For matched studies, give matching criteria and number of exposed and unexposed                                                                                                  |                            |
| Variables                    | 7      | Clearly define all outcomes, exposures, predictors, potential confounders, and effect modifiers. Give diagnostic criteria, if applicable                                             | 7-11                       |
| Data sources/<br>measurement | 8*     | For each variable of interest, give sources of data and details of methods of assessment (measurement). Describe comparability of assessment methods if there is more than one group | 7-11, Supplemental Table 1 |
| Bias                         | 9      | Describe any efforts to address potential sources of bias                                                                                                                            |                            |
| Study size                   | 10     | Explain how the study size was arrived at                                                                                                                                            | 7-9, 13, Figure 2          |
| Quantitative variables       | 11     | Explain how quantitative variables were handled in the analyses. If applicable, describe which groupings were chosen and why                                                         | 9, 11                      |
| Statistical methods          | 12     | (a) Describe all statistical methods, including those used to control for confounding                                                                                                | 11                         |
|                              |        | (b) Describe any methods used to examine subgroups and interactions                                                                                                                  | 11                         |
|                              |        | (c) Explain how missing data were addressed                                                                                                                                          | 11                         |
|                              |        | (d) If applicable, explain how loss to follow-up was addressed                                                                                                                       |                            |
|                              |        | (e) Describe any sensitivity analyses                                                                                                                                                | 10-11                      |
| <b>Results</b>               |        |                                                                                                                                                                                      |                            |

|                          |     |                                                                                                                                                                                                                                                                                                                                                                                                               |                                                      |
|--------------------------|-----|---------------------------------------------------------------------------------------------------------------------------------------------------------------------------------------------------------------------------------------------------------------------------------------------------------------------------------------------------------------------------------------------------------------|------------------------------------------------------|
| Participants             | 13* | (a) Report numbers of individuals at each stage of study—eg numbers potentially eligible, examined for eligibility, confirmed eligible, included in the study, completing follow-up, and analysed<br>(b) Give reasons for non-participation at each stage<br>(c) Consider use of a flow diagram                                                                                                               | 13, Figure 2<br>Figure 2<br>Figure 2                 |
| Descriptive data         | 14* | (a) Give characteristics of study participants (eg demographic, clinical, social) and information on exposures and potential confounders<br>(b) Indicate number of participants with missing data for each variable of interest<br>(c) Summarise follow-up time (eg, average and total amount)                                                                                                                | 14, Tables 1 and 2<br>Tables 1 and 2<br>13, Figure 2 |
| Outcome data             | 15* | Report numbers of outcome events or summary measures over time                                                                                                                                                                                                                                                                                                                                                | 13-19                                                |
| Main results             | 16  | (a) Give unadjusted estimates and, if applicable, confounder-adjusted estimates and their precision (eg, 95% confidence interval). Make clear which confounders were adjusted for and why they were included<br>(b) Report category boundaries when continuous variables were categorized<br>(c) If relevant, consider translating estimates of relative risk into absolute risk for a meaningful time period | 14-20, Table 1, 2, and 3<br>13                       |
| Other analyses           | 17  | Report other analyses done—eg analyses of subgroups and interactions, and sensitivity analyses                                                                                                                                                                                                                                                                                                                | Table 3, Supplemental tables 3 and 4                 |
| <b>Discussion</b>        |     |                                                                                                                                                                                                                                                                                                                                                                                                               |                                                      |
| Key results              | 18  | Summarise key results with reference to study objectives                                                                                                                                                                                                                                                                                                                                                      | 24-27                                                |
| <b>Limitations</b>       |     |                                                                                                                                                                                                                                                                                                                                                                                                               |                                                      |
| Interpretation           | 20  | Give a cautious overall interpretation of results considering objectives, limitations, multiplicity of analyses, results from similar studies, and other relevant evidence                                                                                                                                                                                                                                    | 4, 26-27                                             |
| Generalisability         | 21  | Discuss the generalisability (external validity) of the study results                                                                                                                                                                                                                                                                                                                                         | 4, 26-27                                             |
| <b>Other information</b> |     |                                                                                                                                                                                                                                                                                                                                                                                                               |                                                      |
| Funding                  | 22  | Give the source of funding and the role of the funders for the present study and, if applicable, for the original study on which the present article is based                                                                                                                                                                                                                                                 | 29                                                   |

\*Give information separately for cases and controls in case-control studies and, if applicable, for exposed and unexposed groups in cohort and cross-sectional studies.

**Note:** An Explanation and Elaboration article discusses each checklist item and gives methodological background and published examples of transparent reporting. The STROBE checklist is best used in conjunction with this article (freely available on the Web sites of PLoS Medicine at <http://www.plosmedicine.org/>, Annals of Internal Medicine at <http://www.annals.org/>, and Epidemiology at <http://www.epidem.com/>). Information on the STROBE Initiative is available at [www.strobe-statement.org](http://www.strobe-statement.org).

# BMJ Open

## A Retrospective Cohort Study to Characterize the Blood Pressure Response to Spironolactone in Patients with Apparent Therapy-resistant Hypertension using Electronic Medical Record Data

|                                 |                                                                                                                                                                                                                                                                                                                                                          |
|---------------------------------|----------------------------------------------------------------------------------------------------------------------------------------------------------------------------------------------------------------------------------------------------------------------------------------------------------------------------------------------------------|
| Journal:                        | <i>BMJ Open</i>                                                                                                                                                                                                                                                                                                                                          |
| Manuscript ID                   | bmjopen-2019-033100.R2                                                                                                                                                                                                                                                                                                                                   |
| Article Type:                   | Original research                                                                                                                                                                                                                                                                                                                                        |
| Date Submitted by the Author:   | 27-Feb-2020                                                                                                                                                                                                                                                                                                                                              |
| Complete List of Authors:       | Shuey, Megan; Vanderbilt University Medical Center, Perkins, Bradley; Vanderbilt University School of Medicine<br>Nian, Hui; Vanderbilt University Department of Biostatistics, Yu, Chang; Vanderbilt University School of Medicine<br>Luther, James; Vanderbilt University School of Medicine<br>Brown, Nancy; Vanderbilt University School of Medicine |
| <b>Primary Subject Heading</b>: | Health informatics                                                                                                                                                                                                                                                                                                                                       |
| Secondary Subject Heading:      | Pharmacology and therapeutics                                                                                                                                                                                                                                                                                                                            |
| Keywords:                       | spironolactone, blood pressure response, mineralocorticoid receptor antagonist, electronic medical records, Hypertension < CARDIOLOGY                                                                                                                                                                                                                    |
|                                 |                                                                                                                                                                                                                                                                                                                                                          |

SCHOLARONE™  
Manuscripts



I, the Submitting Author has the right to grant and does grant on behalf of all authors of the Work (as defined in the below author licence), an exclusive licence and/or a non-exclusive licence for contributions from authors who are: i) UK Crown employees; ii) where BMJ has agreed a CC-BY licence shall apply, and/or iii) in accordance with the terms applicable for US Federal Government officers or employees acting as part of their official duties; on a worldwide, perpetual, irrevocable, royalty-free basis to BMJ Publishing Group Ltd ("BMJ") its licensees and where the relevant Journal is co-owned by BMJ to the co-owners of the Journal, to publish the Work in this journal and any other BMJ products and to exploit all rights, as set out in our [licence](#).

The Submitting Author accepts and understands that any supply made under these terms is made by BMJ to the Submitting Author unless you are acting as an employee on behalf of your employer or a postgraduate student of an affiliated institution which is paying any applicable article publishing charge ("APC") for Open Access articles. Where the Submitting Author wishes to make the Work available on an Open Access basis (and intends to pay the relevant APC), the terms of reuse of such Open Access shall be governed by a Creative Commons licence – details of these licences and which [Creative Commons](#) licence will apply to this Work are set out in our licence referred to above.

Other than as permitted in any relevant BMJ Author's Self Archiving Policies, I confirm this Work has not been accepted for publication elsewhere, is not being considered for publication elsewhere and does not duplicate material already published. I confirm all authors consent to publication of this Work and authorise the granting of this licence.

1  
2  
3 **A Retrospective Cohort Study to Characterize the Blood Pressure Response to**  
4 **Spironolactone in Patients with Apparent Therapy-resistant Hypertension using**  
5 **Electronic Medical Record Data**  
6  
7  
8  
9

10  
11  
12 Megan M. Shuey, Ph.D.;<sup>1</sup> Bradley Perkins, B.S.;<sup>1</sup> Hui Nian, Ph.D.;<sup>2</sup> Chang Yu, Ph.D.;<sup>2</sup>

13  
14  
15 James M. Luther, M.D.;<sup>1</sup> Nancy J. Brown, M.D.<sup>1\*</sup>  
16

17  
18  
19 Departments of Medicine<sup>1</sup> and Biostatistics,<sup>2</sup> Vanderbilt University School of Medicine,  
20  
21 Nashville, TN.  
22  
23

24  
25  
26 **\*Corresponding author:**  
27

28 Nancy J. Brown, M.D.  
29

30  
31 D-3100 Medical Center North  
32

33 Vanderbilt University School of Medicine  
34

35 Nashville, TN, 37232-2358  
36

37 Fax: (615) 343-2551  
38

39  
40 Tel.:(615) 343-8701  
41

42 Email: nancy.j.brown@vumc.org  
43  
44  
45  
46  
47  
48  
49  
50  
51  
52  
53  
54  
55  
56  
57  
58  
59  
60

## ABSTRACT

**Objective:** Identify blood pressure (BP) response to spironolactone in patients with apparent therapy-resistant hypertension (aTRH) using electronic medical records (EMRs) in order to estimate response in a real-world clinical setting.

**Design:** Developed an algorithm to determine BP and electrolyte response to spironolactone.

**Setting:** An academic medical center in Nashville, Tennessee

**Population:** Patients with aTRH prescribed spironolactone.

**Main Outcome Measures:** Baseline BP and BP response, determined as the change in mean systolic BP (SBP) and diastolic BP (DBP) following spironolactone initiation.

Additional response measures were serum sodium, potassium, and creatinine, estimated glomerular filtration rate, hemoglobin A1c (HbA1c), glucose, high density lipoprotein, low density lipoprotein, triglycerides. Demographic characteristics included race, age, gender, body mass index (BMI), diabetes mellitus, chronic kidney disease stage three, ischemic heart disease, and smoking.

**Results:** The mean decreases in SBP and DBP were 8.1 and 3.4 mmHg, consistent with clinical trial data. Using a mean decrease in SBP of five mmHg or in DBP of two mmHg to define “responders,” 30.3% of patients did not respond. In univariable analyses, responders had higher BMI, baseline SBP, DBP, sodium, and HbA1c, and lower creatinine. In multivariable analysis, responders were older and had significantly higher BMI and baseline SBP and DBP, and lower potassium. Increases in potassium and creatinine following spironolactone were larger in responders. When BP was evaluated as a continuous variable, decreases in SBP and DBP correlated with baseline BP, decrease

1  
2  
3 in sodium, and increases in potassium and creatinine following spironolactone. The  
4  
5 decrease in SBP was associated with decreasing glucose in European Americans.  
6

7  
8 **Conclusions:** We developed an algorithm to assess BP response to a commonly  
9  
10 prescribed medication for aTRH using EMRs. Electrolyte changes associated with the BP  
11  
12 response to spironolactone are consistent with its mechanism of action of blocking the  
13  
14 mineralocorticoid receptor and decreasing epithelial sodium channel activity.  
15  
16  
17  
18  
19  
20  
21  
22  
23  
24  
25  
26  
27  
28  
29  
30  
31  
32  
33  
34  
35  
36  
37  
38  
39  
40  
41  
42  
43  
44  
45  
46  
47  
48  
49  
50  
51  
52  
53  
54  
55  
56  
57  
58  
59  
60



### Strengths and Limitations of this study:

- A strength of this study is the accuracy of the algorithm developed to determine blood pressure response to spironolactone in a large number of patients with apparent therapy-resistant hypertension (aTRH).
- The availability of clinical electrolyte measurements, in addition to blood pressure measurements, is another strength as it provides data supporting the mechanism of mineralocorticoid receptor (MR) antagonism in responders to spironolactone.
- Additional strengths are that this study provides methodology which can be applied in future pharmacogenetic studies using electronic health records, and that the algorithm can be adapted for use with other medications or in other large-scale electronic medical record systems with linked genetic data.
- Limitations of this study include the inability to confirm medication adherence, a lack of ambulatory blood pressure measurements, and a lack of some laboratory measures, such as hemoglobin A1c (HbA1c) and lipids, for the entire population.

**Keywords:** spironolactone; mineralocorticoid receptor antagonist; blood pressure response; apparent therapy-resistant hypertension; electronic medical record

## INTRODUCTION

The mineralocorticoid receptor (MR) antagonist spironolactone has been identified as effective add-on therapy for blood pressure (BP) control in patients with apparent therapy-resistant hypertension (aTRH) in clinical trials, including the Anglo-Scandinavian Cardiac Outcomes Trial-Blood Pressure Lowering Arm (ASCOT-BPLA) and the Prevention and Treatment of Hypertension with Algorithm Based Therapy-2 (PATHWAY-2).<sup>1-4</sup> In the PATHWAY-2 trial, addition of spironolactone at a dose of 25-50 mg/day to a therapeutic regimen containing an angiotensin-converting enzyme inhibitor (ACEi) or angiotensin receptor blocker (ARB), calcium channel blocker (CCB), and thiazide-like diuretic significantly decreased home systolic blood pressure (SBP) by a mean of 8.7 mmHg.<sup>1</sup> In prior clinical studies the SBP/diastolic blood pressure (DBP) responses to spironolactone have ranged from a mean decrease of 4.6/1.8 mmHg to a mean decrease of 25/12 mmHg.<sup>1-5</sup>

Clinical trials often assess homogenous groups of patients limiting the applicability in a real-world clinical setting. We hypothesized that we could use electronic medical records (EMR) to assess the BP response to the addition of spironolactone in resistant hypertensive patients who were on a stable anti-hypertensive regimen of at least three medications including a thiazide diuretic or dihydropyridine CCB. We used a previously published algorithm for the identification of patients with aTRH.<sup>6</sup> To evaluate the BP response to spironolactone we developed an additional algorithm to identify patients who were prescribed spironolactone during a period of

1  
2  
3 stable medication use from up to six months before the start of spironolactone to six  
4  
5 months after. The accuracy of the algorithm was validated by electronic record review.  
6  
7

8 We collected all outpatient BPs and laboratory measurements during the period of  
9  
10 stable medication use before and after initial spironolactone prescription. We assessed BP  
11  
12 response as a continuous variable and as a dichotomized variable (responders vs non-  
13  
14 responders). We also assessed electrolyte measurements relevant to the mechanism of  
15  
16 action of spironolactone, MR antagonism.  
17  
18  
19  
20  
21  
22  
23  
24  
25  
26  
27  
28  
29  
30  
31  
32  
33  
34  
35  
36  
37  
38  
39  
40  
41  
42  
43  
44  
45  
46  
47  
48  
49  
50  
51  
52  
53  
54  
55  
56  
57  
58  
59  
60

## METHODS

### Electronic Medical Record

We obtained Institutional Review Board approval to access the Vanderbilt University Medical Center (VUMC) Synthetic Derivative (SD). The SD is a de-identified copy of the VUMC EMR with Health Insurance Portability and Accountability Act of 1996 (HIPAA) identifiers removed by established de-identification software as well as custom techniques.<sup>7</sup> The SD contains almost all available clinical data including basic demographics, such as race and sex; text from clinical care notes; laboratory values; inpatient and outpatient medication data; international classification of disease (ICD) and current procedural terminology (CPT) codes; and other diagnostic reports.<sup>7</sup> To date, the SD contains approximately 2.8 million records, approximately one million of which contain detailed longitudinal data.

### Spironolactone Response Algorithm Development

Patients within the SD were identified as having aTRH using a previously published algorithm.<sup>6</sup> Patients were defined as having aTRH if their BP was greater than or equal to 140/90 mmHg, despite concurrent use of three antihypertensives including a thiazide diuretic or dihydropyridine CCB, or if they were taking four or more antihypertensive medications, including a thiazide diuretic or dihydropyridine CCB. Patients with secondary hypertension, chronic kidney disease (CKD) stages four and five, heart failure with reduced ejection fraction less than 35 percent, thyroid and parathyroid disorders, nephrotic syndrome, chronic glomerulonephritis, anomalies of the bulbus

1  
2  
3 cordis, coarctation of the aorta, adrenal gland neoplasms and disorders (excluding adrenal  
4 insufficiencies), chronic pulmonary heart disease, thyrotoxicosis, disorders of  
5 thyrocalcitonin secretion, and obstructive uropathy were excluded by the aTRH algorithm  
6  
7  
8  
9  
10 **(Supplemental Table 1).**

11  
12 All drug exposures to antihypertensive medications including spironolactone were  
13 identified from the SD by electronic-prescribing tools and MedEx.<sup>8</sup> The utility of these  
14 tools for extracting medication data from the EMR has been shown previously.<sup>9, 10</sup> For a  
15 medication exposure to be considered valid at least one of the following identifiers- dose,  
16 route, frequency, or duration- was required.  
17  
18  
19  
20  
21  
22

23  
24 We developed an algorithm to identify patients in the SD who were prescribed  
25 spironolactone and in whom BP was measured within a stable window of time before and  
26 after initiation of spironolactone. Using electronic prescribing tools and MedEx,<sup>8</sup> the  
27 novel start date (NSD) for a spironolactone prescription was determined by the earliest  
28 mention of spironolactone, aldactone, or aldactazide in a patient's record after the patient  
29 met the aTRH case definition. In addition, spironolactone, aldactone, or aldactazide  
30 prescription had to have been listed at least twice, at least one month apart, during the  
31 subsequent six-month period. Patients who were initiated on aldactazide  
32 (aldactone/hydrochlorothiazide combination therapy) were required to have been using a  
33 thiazide diuretic immediately prior to the NSD for aldactazide. Patients who were not  
34 prescribed a thiazide prior to the start of aldactazide were excluded as having been started  
35 on spironolactone and hydrochlorothiazide (HCTZ) concurrently. Use of the MR  
36 antagonist eplerenone was not included in the study as it was prescribed to only 2% of the  
37 resistant hypertensive population.  
38  
39  
40  
41  
42  
43  
44  
45  
46  
47  
48  
49  
50  
51  
52  
53  
54  
55  
56  
57  
58  
59  
60

1  
2  
3 Patients prescribed spironolactone without an outpatient BP measurement in the  
4  
5 six months before or after the NSD were excluded. Patients who were diagnosed with  
6  
7 other indications for spironolactone including heart failure, hepatic cirrhosis,  
8  
9 hyperandrogenism, acne, or polycystic ovarian syndrome within a year of the NSD were  
10  
11 also excluded. Using the algorithm, we identified sliding time windows up to six months  
12  
13 before (baseline) and six months after the NSD (response) when there were no changes to  
14  
15 each patient's prescribed antihypertensive medications, including dose (when available),  
16  
17 the number of medications, and class type (**Figure 1**).  
18  
19  
20

21  
22 Once the baseline and response periods were defined, all outpatient BP  
23  
24 measurements taken during these periods were identified. Any patient without at least  
25  
26 two BP measurements during the baseline and response periods was excluded. The SBP  
27  
28 and DBP responses were calculated as the difference between the mean SBP or DBP in  
29  
30 the stable post-treatment window minus the mean SBP or DBP in the pre-treatment  
31  
32 window (e.g.  $\Delta SBP = \overline{SBP}_{post} - \overline{SBP}_{pre}$ ). Any SBP and DBP responses that were  
33  
34 more than two standard deviations from the mean were reviewed manually to confirm  
35  
36 accuracy.  
37  
38  
39

40 We also defined patients as responders versus non-responders based on a review  
41  
42 of BP responses reported in clinical trials of spironolactone in European (EA) and  
43  
44 African Americans (AA).<sup>1-5</sup> We defined responders as those who had a decrease in mean  
45  
46 SBP of at least five mmHg or a decrease in mean DBP of at least two mmHg,  
47  
48 corresponding to the smallest SBP and DBP responses to spironolactone reported among  
49  
50 the studies reviewed.<sup>5</sup>  
51  
52  
53  
54  
55  
56  
57  
58  
59  
60

1  
2  
3 All patient characteristics, including age, gender, race, body mass index (BMI),  
4 outpatient BP measurements, serum potassium, creatinine, and sodium, high-density  
5 lipoprotein (HDL) cholesterol, low-density lipoprotein (LDL) cholesterol, triglycerides,  
6 glucose, hemoglobin A1C (HbA1c), and history of CKD stage three, ischemic heart  
7 disease (IHD), type two diabetes mellitus (T2DM), and smoking, were extracted from the  
8 SD using a combination of ICD-9 and -10 codes, CPT codes, laboratory measurements,  
9 and natural-language processing (**Supplemental Table 2**). Aldosterone, renin, renin  
10 activity, and aldosterone-renin-ratio (ARR) were not evaluated due to the small numbers  
11 of patients with data. For each patient, age and BMI at NSD or the date closest to NSD  
12 was used. The estimated glomerular filtration rate (eGFR) was calculated using the  
13 Modification of Diet in Renal Disease (MDRD) formula.<sup>11</sup> CKD stage three was defined  
14 as an eGFR  $\geq 30$  mL/min/1.73m<sup>2</sup> and  $\leq 60$  mL/min/1.73m<sup>2</sup> or equivalent ICD-9 or -10  
15 code at any point before NSD. Patient race was administratively assigned in the SD  
16 based on either physician or patient report. Previous work has shown that self-identified  
17 race is highly correlated with genetic ancestry<sup>12, 13</sup> and administratively assigned race in  
18 the VUMC SD is sufficient for genetic association analyses<sup>14</sup> and correlates tightly with  
19 genetic ancestry.<sup>13</sup>

20  
21  
22 After the algorithms were iteratively refined, blinded chart reviews of randomly  
23 chosen, never overlapping, charts were performed to determine algorithm efficacy.  
24 Based on a population size of 17,082, review of 138 charts would allow detection of a  
25 misclassification rate of 10% with a margin of error of 5%. We therefore reviewed 150  
26 charts to determine algorithm efficacy. The review consisted of 75 charts from resistant  
27 hypertensive patients that were included by the algorithm and 75 that were excluded. The

1  
2  
3 algorithm was refined until a negative predictive value (NPV), positive predictive value  
4 (PPV), sensitivity, and specificity greater than 90% was achieved based on the review of  
5  
6 150 charts. The final version of the algorithm will be made available at Phenotype  
7  
8 KnowledgeBase (PheKB).<sup>15</sup>  
9

## 10 11 12 13 14 15 **Statistical Methods**

16  
17 Data are presented as frequencies for categorical variables and mean  $\pm$  standard  
18  
19 deviations for continuous variables. Univariable analysis for binary BP response was  
20  
21 performed using Pearson's chi-squared test for categorical variables and the Wilcoxon  
22  
23 rank-sum test for continuous variables. A multivariable logistic regression model or  
24  
25 multivariable linear regression model was fitted for binary BP response and continuous  
26  
27 BP change on all variables available in more than 70% of the population. Missing values  
28  
29 were not imputed. HDL cholesterol, LDL cholesterol, triglycerides, and HbA1c were  
30  
31 excluded from multivariable regression models due to large amounts of missing values.  
32  
33 The method of complete-case analysis was used and a linear relationship was assumed  
34  
35 for all the continuous variables. All statistical analyses were conducted using the SPSS  
36  
37 software version 24 (SPSS, Chicago, IL, USA) or R 3.3.0.<sup>16</sup>  
38  
39  
40  
41  
42  
43

## 44 45 **Patient and Public Involvement**

46  
47 Because this study involved the use of the VUMC SD, patients were not recruited  
48  
49 and there was no intervention. While patients were not involved in the development of  
50  
51 the specific research question or study design, there has been extensive patient and  
52  
53 community engagement in the establishment of the SD. Further, a community advisory  
54  
55  
56  
57  
58  
59  
60



1  
2  
3  
4  
5  
6  
7  
8  
9  
10  
11  
12  
13  
14  
15  
16  
17  
18  
19  
20  
21  
22  
23  
24  
25  
26  
27  
28  
29  
30  
31  
32  
33  
34  
35  
36  
37  
38  
39  
40  
41  
42  
43  
44  
45  
46  
47  
48  
49  
50  
51  
52  
53  
54  
55  
56  
57  
58  
59  
60

board within the Vanderbilt Institute for Clinical and Translational Research (VICTR) reviews programs including the SD. Dissemination of study results will occur through local reporting of study results.

For peer review only

## RESULTS

### Algorithm validation

NPV, PPV, sensitivity, and specificity of the algorithm for spironolactone response were determined after the blinded review of 150 electronic records. All but one excluded record were excluded appropriately. That record was excluded by the algorithm due to an erroneous ascertainment that a medication other than spironolactone had been added during the response periods. Five of the 75 records included in the algorithm should have been excluded. Four of these patients had inconsistencies in their medication history during the baseline or response period. In another patient, spironolactone was listed as a potential therapy in several notes but was not apparently prescribed. Based on this review, the NPV was 98.7%, PPV was 93.3%, sensitivity was 98.6%, and specificity was 93.7%.

### Identification of spironolactone response population

Among EA and AA patients with aTRH in the SD 3,405 EA and 1,054 AA were prescribed spironolactone. Consistent with the aTRH definition, in addition to other antihypertensive medications, patients were prescribed a thiazide diuretic or a dihydropyridine CCB prior to spironolactone initiation. The median daily dose of thiazide diuretic was 25 mg with a range from 12.5 mg to 50 mg (**Supplemental Table 3**). The predominant dihydropyridine CCBs prescribed were amlodipine and nifedipine. The median daily dose of amlodipine and nifedipine were 10 mg with a range from 2.5 mg to 10 mg and 90 mg with a range from 30 mg to 120 mg, respectively (**Supplemental Table 3**). For a subset of these patients the thiazide or dihydropyridine CCB dose at

1  
2  
3 spironolactone initiation, e.g. dose of the medication identified in the month preceding or  
4 following spironolactone prescription, could not be determined. From the patients with  
5 confirmed doses 566 (80.6%) were prescribed a 25 mg thiazide, 312 (73.9%) were  
6 prescribed 10 mg amlodipine, and 110 (40.3%) were prescribed 90 mg nifedipine.  
7  
8  
9

10  
11  
12 After applying exclusion and inclusion criteria, 1,114 EA patients and 369 AA  
13 patients were included in the study for evaluation of spironolactone response, 32.7% and  
14 35.0% of the original number of patients prescribed spironolactone, respectively (**Figure**  
15 **2**). The median dose of spironolactone was 25 mg and ranged from 12.5 to 200 mg. The  
16 majority of patients included in the study, 1,050 (70.8%), were prescribed 25 mg of  
17 spironolactone. 107 patients were prescribed spironolactone at a dose of 12.5mg and one  
18 at a dose of 200 mg. In total, 261 patients (17.6%) patients were prescribed a 50 mg or  
19 greater dose of spironolactone. The average number of outpatient BPs measured during  
20 the baseline and response periods were 4 and 4.8, respectively.  
21  
22  
23  
24  
25  
26  
27  
28  
29  
30  
31  
32  
33  
34

### 35 **Characteristics of spironolactone responders and non-responders**

36  
37  
38 Defining spironolactone response as a reduction in SBP of at least five mmHg or  
39 in DBP of at least two mmHg, we identified 1,034 responders (69.7%) and 449 non-  
40 responders (30.3%) in the total population. Of the responders, 15.8% met the criteria for a  
41 DBP response, 19.4% for a SBP response, and 64.8% for both a DBP and SBP response.  
42 Patient characteristics appear in **Table 1**. In univariable analyses, patients who  
43 responded to spironolactone were heavier and less likely to have a history of IHD.  
44 Responders had significantly higher baseline SBP, DBP, serum sodium, and HbA1c, and  
45 significantly lower baseline creatinine than nonresponders (**Table 1**). Responders also  
46  
47  
48  
49  
50  
51  
52  
53  
54  
55  
56  
57  
58  
59  
60

1  
2  
3 had greater decreases in serum sodium and eGFR as well as greater increases in serum  
4 potassium and creatinine after starting spironolactone than nonresponders (**Table 1**).  
5  
6  
7 HbA1c did not change in responders whereas it declined over time in non-responders. In  
8  
9  
10 a multivariable model adjusting for all variables present in at least 1000 patients,  
11  
12 responders were older and heavier, had higher baseline SBP and DBP, had lower baseline  
13  
14 serum potassium and had a greater increase in serum potassium and creatinine after  
15  
16 starting spironolactone than non-responders (**Table 2**).  
17  
18  
19  
20  
21  
22  
23  
24  
25  
26  
27  
28  
29  
30  
31  
32  
33  
34  
35  
36  
37  
38  
39  
40  
41  
42  
43  
44  
45  
46  
47  
48  
49  
50  
51  
52  
53  
54  
55  
56  
57  
58  
59  
60

**Table 1. Characteristics of spironolactone responders and nonresponders in the total population.**

| Variable                        | N    | Nonresponders<br>(n=449) | Responders<br>(n=1,034) | p-value |
|---------------------------------|------|--------------------------|-------------------------|---------|
| Age, years                      | 1483 | 63.67 ± 13.18            | 64.28 ± 12.63           | 0.33    |
| Female, n (%)                   | 1483 | 215 (47.9%)              | 532 (51.5%)             | 0.21    |
| Black Race, n (%)               | 1483 | 106 (23.6%)              | 263 (25.4%)             | 0.46    |
| BMI, kg/m <sup>2</sup>          | 1358 | 32.2 ± 8.0               | 33.5 ± 8.3              | 0.004   |
| Diagnostic History              |      |                          |                         |         |
| T2DM, n (%)                     | 1483 | 236 (52.6%)              | 566 (54.7%)             | 0.44    |
| CKD3, n (%)                     | 1483 | 163 (36.3%)              | 398 (38.5%)             | 0.43    |
| IHD, n (%)                      | 1483 | 179 (39.9%)              | 351 (33.9%)             | 0.03    |
| Smoking, n (%)                  | 1483 | 96 (21.4%)               | 211 (20.4%)             | 0.67    |
| Baseline measurements           |      |                          |                         |         |
| SBP, mmHg                       | 1483 | 133.20 ± 17.40           | 147.59 ± 18.70          | < 0.001 |
| DBP, mmHg                       | 1483 | 71.66 ± 11.74            | 79.00 ± 13.08           | < 0.001 |
| Serum sodium, mmol/L            | 1176 | 138.67 ± 3.22            | 139.25 ± 2.98           | 0.004   |
| Serum potassium, mmol/L         | 1177 | 3.95 ± 0.47              | 3.91 ± 0.43             | 0.15    |
| Creatinine, mg/dL               | 1184 | 1.12 ± 0.36              | 1.09 ± 0.42             | 0.03    |
| eGFR, mL/min/1.73m <sup>2</sup> | 1382 | 76.73 ± 23.78            | 77.38 ± 20.95           | 0.51    |
| Glucose, mg/dL                  | 1179 | 125.56 ± 58.56           | 126.98 ± 50.61          | 0.80    |
| HbA1c, %                        | 538  | 6.91 ± 1.81              | 7.23 ± 3.06             | 0.02    |
| HDL cholesterol, mg/dL          | 575  | 47.48 ± 17.97            | 45.53 ± 15.31           | 0.44    |

|                                                                        |      |                 |                 |         |
|------------------------------------------------------------------------|------|-----------------|-----------------|---------|
| LDL cholesterol, mg/dL                                                 | 537  | 95.65 ± 39.74   | 98.54 ± 34.72   | 0.41    |
| Triglycerides, mg/dL                                                   | 578  | 163.98 ± 111.71 | 169.39 ± 121.20 | 0.85    |
| Difference from baseline following initial spironolactone prescription |      |                 |                 |         |
| Serum sodium, mmol/L                                                   | 1101 | -0.49 ± 2.63    | -0.95 ± 2.70    | 0.006   |
| Serum potassium, mmol/L                                                | 1104 | 0.13 ± 0.48     | 0.25 ± 0.42     | < 0.001 |
| Creatinine, mg/dL                                                      | 1108 | 0.02 ± 0.23     | 0.134 ± 0.30    | < 0.001 |
| eGFR, mL/min/1.73m <sup>2</sup>                                        | 1254 | -5.22 ± 15.73   | -9.09 ± 15.10   | < 0.001 |
| Glucose, mg/dL                                                         | 1101 | -0.27 ± 47.82   | -0.37 ± 40.62   | 0.88    |
| HbA1c, %                                                               | 284  | -0.25 ± 1.23    | 0.02 ± 1.05     | 0.02    |
| HDL cholesterol, mg/dL                                                 | 214  | 0.70 ± 11.51    | -1.36 ± 9.35    | 0.23    |
| LDL cholesterol, mg/dL                                                 | 197  | -5.74 ± 32.54   | -7.48 ± 34.94   | 0.77    |
| Triglycerides, mg/dL                                                   | 220  | -17.86 ± 107.95 | -19.43 ± 107.16 | 0.91    |

Abbreviations: BMI, body mass index; CKD3, chronic kidney disease stage three; DBP, diastolic blood pressure; eGFR, estimated glomerular filtration rate; HbA1c, hemoglobin A1c; HDL, high-density lipoprotein; IHD, ischemic heart disease; LDL, low-density lipoprotein; N, number of individuals with the specific measure; SBP, systolic blood pressure; T2DM, type 2 diabetes mellitus.

Data are presented as mean ± standard deviation for continuous variables and count (%) for categorical variables

**Table 2. Multivariable logistic regression model for responder versus non-responder in the total population without missing data (N=1019).**

|                                                                        | Odds Ratio* | 95% Confidence Interval | p-value |
|------------------------------------------------------------------------|-------------|-------------------------|---------|
| Age, years                                                             | 1.034       | 1.017-1.052             | < 0.001 |
| Gender, Male: Female                                                   | 0.897       | 0.603-1.323             | 0.59    |
| Race, White: Black                                                     | 1.217       | 0.800-1.849             | 0.36    |
| Mean BMI, kg/m <sup>2</sup>                                            | 1.030       | 1.008-1.054             | 0.01    |
| Diagnostic history                                                     |             |                         |         |
| T2DM, Yes: No                                                          | 1.132       | 0.794-1.615             | 0.49    |
| CKD3, Yes: No                                                          | 0.932       | 0.654-1.330             | 0.70    |
| IHD, Yes: No                                                           | 1.256       | 0.905-1.749             | 0.18    |
| Smoking, Yes: No                                                       | 1.074       | 0.745-1.559             | 0.71    |
| Baseline measurements                                                  |             |                         |         |
| SBP, mmHg                                                              | 1.034       | 1.023-1.046             | < 0.001 |
| DBP, mmHg                                                              | 1.043       | 1.025-1.062             | < 0.001 |
| Serum sodium, mmol/L                                                   | 1.013       | 0.957-1.071             | 0.66    |
| Serum potassium, mmol/L                                                | 1.686       | 1.106-2.588             | 0.02    |
| Creatinine, mg/dL                                                      | 1.266       | 0.603-2.995             | 0.57    |
| eGFR, mL/min/1.73m <sup>2</sup>                                        | 1.007       | 0.993-1.021             | 0.32    |
| Glucose, mg/dL                                                         | 0.999       | 0.996-1.003             | 0.80    |
| Difference from baseline following initial spironolactone prescription |             |                         |         |
| Serum sodium, mmol/L                                                   | 0.946       | 0.888-1.007             | 0.08    |

|                                 |       |             |       |
|---------------------------------|-------|-------------|-------|
| Serum potassium, mmol/L         | 1.968 | 1.290-3.030 | 0.002 |
| Creatinine, mg/dL               | 3.570 | 1.610-9.131 | 0.004 |
| eGFR, mL/min/1.73m <sup>2</sup> | 1.001 | 0.987-1.015 | 0.92  |
| Glucose, mg/dL                  | 0.997 | 0.992-1.001 | 0.12  |

Abbreviations: BMI, body mass index; CKD 3, chronic kidney disease stage three; DBP, diastolic blood pressure; eGFR, estimated glomerular filtration rate; IHD, ischemic heart disease; N, number of individuals included in the analysis; SBP, systolic blood pressure.

\*For continuous variables, the odds ratio reflects the effect of a one-unit increase. For example, a one mmHg increase in baseline SBP increases the odds ratio for responder versus non-responder 0.03.



1  
2  
3 Among EA patients, 343 (30.8%) did not respond to spironolactone. EA  
4 responders were heavier and less likely to have IHD. They had higher baseline SBP,  
5 DBP, and serum sodium than nonresponders (**Supplemental Table 4**). EA responders  
6 also had a greater decrease in serum sodium and eGFR and a greater increase in serum  
7 potassium and creatinine after starting spironolactone (**Supplemental Table 4**).  
8  
9

10  
11  
12 Among AA patients, 106 (28.7%) did not respond to spironolactone. Like EA  
13 responders, AA responders had significantly higher baseline SBP and DBP and a greater  
14 decrease in serum sodium and increase in creatinine after starting spironolactone than  
15 nonresponders (**Supplemental Table 5**).  
16  
17  
18  
19  
20  
21  
22  
23  
24  
25

### 26 **Blood pressure response to spironolactone as a continuous variable**

27  
28 For the entire group, the mean decrease in SBP following initiation of  
29 spironolactone was 8.1 mmHg and the mean decrease in DBP was 3.4 mmHg following  
30 initial spironolactone prescription. In total, 933 patients (62.9%) achieved a decrease in  
31 BP to  $\leq 140/90$  mmHg, the pressure goal recommended in guidelines at the time.<sup>17</sup> An  
32 additional 23 patients achieved a decrease in SBP but not DBP to guideline  
33 recommendation and 262 patients achieved DBP but not SBP control. Analyses of BP  
34 change as a continuous variable were performed using a multivariable model that  
35 included all variables except for HbA1c, HDL cholesterol, LDL cholesterol, and  
36 triglycerides, as data were not available in the majority of patients.  
37  
38  
39  
40  
41  
42  
43  
44  
45  
46  
47  
48

49 In the total population, patients with higher baseline SBP, lower baseline  
50 creatinine, and a greater decrease in serum sodium, increase in serum potassium, or  
51 increase in creatinine after starting spironolactone had greater reductions in SBP (**Table 3**)  
52  
53  
54  
55  
56  
57  
58  
59  
60

1  
2  
3 and **Figure 3**). Patients with higher baseline SBP and DBP and a greater decrease in  
4 serum sodium, increase in serum potassium, or increase in creatinine after spironolactone  
5 had greater reductions in DBP (**Table 3**). Older patients and female patients also had  
6 significantly greater reductions in DBP (**Table 3**).  
7  
8  
9  
10  
11  
12  
13  
14  
15  
16  
17  
18  
19  
20  
21  
22  
23  
24  
25  
26  
27  
28  
29  
30  
31  
32  
33  
34  
35  
36  
37  
38  
39  
40  
41  
42  
43  
44  
45  
46  
47  
48  
49  
50  
51  
52  
53  
54  
55  
56  
57  
58  
59  
60

**Table 3. Significant coefficients in multivariable models for change in systolic and diastolic blood pressures.**

|                                   | <b>Associated Variable</b> | <b>Coefficient</b> | <b>95% Confidence Interval</b> | <b>p-value</b> |
|-----------------------------------|----------------------------|--------------------|--------------------------------|----------------|
| <b>Total population (N=1019)</b>  |                            |                    |                                |                |
| Change in SBP                     | Baseline SBP               | -0.415             | -0.475, -0.356                 | < 0.001        |
|                                   | Baseline creatinine        | 3.628              | 0.202, 7.054                   | 0.04           |
|                                   | Change in serum sodium     | 0.701              | 0.338, 1.064                   | < 0.001        |
|                                   | Change in serum potassium  | -3.483             | -5.834, -1.131                 | 0.004          |
|                                   | Change in creatinine       | -5.039             | -8.704, -1.374                 | 0.01           |
| Change in DBP                     | Age                        | -0.141             | -0.196, -0.086                 | < 0.001        |
|                                   | Gender- Male: Female       | 1.390              | 0.170, 2.610                   | 0.03           |
|                                   | Baseline SBP               | -0.045             | -0.080, -0.011                 | 0.01           |
|                                   | Baseline DBP               | -0.379             | -0.436, -0.321                 | < 0.001        |
|                                   | Change in serum sodium     | 0.274              | 0.063, 0.485                   | 0.01           |
|                                   | Change in serum potassium  | -2.042             | -3.413, -0.671                 | 0.004          |
|                                   | Change in creatinine       | -3.979             | -6.116, -1.841                 | < 0.001        |
| <b>European Americans (N=753)</b> |                            |                    |                                |                |
| Change in SBP                     | Baseline SBP               | -0.401             | -0.470, -0.333                 | < 0.001        |
|                                   | Change in serum sodium     | 0.525              | 0.117, 0.933                   | 0.01           |
|                                   | Change in serum potassium  | -3.074             | -5.766, -0.381                 | 0.03           |
|                                   | Change in glucose          | 0.031              | 0.003, 0.059                   | 0.03           |
| Change in DBP                     | Age                        | -0.135             | -0.200, -0.070                 | < 0.001        |
|                                   | Gender, Male: Female       | 1.669              | 0.230, 3.108                   | 0.02           |

|                                  |                           |         |                 |         |
|----------------------------------|---------------------------|---------|-----------------|---------|
|                                  | Baseline SBP              | -0.045  | -0.084, -0.005  | 0.03    |
|                                  | Baseline DBP              | -0.370  | -0.436, -0.303  | < 0.001 |
|                                  | Change in serum potassium | -1.809  | -3.385, -0.232  | 0.03    |
|                                  | Change in creatinine      | -3.328  | -5.772, -0.884  | 0.01    |
| <b>African Americans (N=266)</b> |                           |         |                 |         |
| Change in SBP                    | Baseline SBP              | -0.445  | -0.571, -0.319  | < 0.001 |
|                                  | Baseline creatinine       | 5.572   | 0.017, 11.127   | 0.05    |
|                                  | Change in serum sodium    | 1.338   | 0.517, 2.159    | 0.002   |
|                                  | Change in potassium       | -5.206  | -10.205, -0.207 | 0.04    |
|                                  | Change in creatinine      | -10.923 | -19.456, -2.391 | 0.01    |
| Change in DBP                    | Age                       | -0.156  | -0.265, -0.046  | 0.01    |
|                                  | Baseline DBP              | -0.407  | -0.512, -0.278  | < 0.001 |
|                                  | Change in sodium          | 0.530   | 0.053-1.007     | 0.03    |
|                                  | Change in potassium       | -2.864  | -5.768, 0.039   | 0.05    |
|                                  | Change in creatinine      | -7.370  | -12.326, -2.413 | 0.004   |

Abbreviations: DBP, diastolic blood pressure; N, number of individuals included in the analysis; SBP, systolic blood pressure.

1  
2  
3 In EA alone, a greater decrease in either SBP or DBP was significantly associated  
4 with baseline SBP, as well as increase in serum potassium (**Table 3**). A greater reduction  
5 in SBP was further associated with greater decreases in serum sodium and glucose  
6 (**Table 3**). The change in DBP was also significantly associated with age, sex, and  
7 creatinine (**Table 3**).  
8  
9  
10  
11  
12  
13

14 In AA, greater reductions in SBP and DBP were significantly associated with  
15 greater decreases in serum sodium and increases in serum potassium and creatinine  
16 (**Table 3**). Patients with higher baseline SBP and baseline creatinine had a greater  
17 reduction in SBP, while patients with higher baseline DBP and older age had a greater  
18 reduction in DBP (**Table 3**).  
19  
20  
21  
22  
23  
24  
25  
26  
27  
28  
29  
30  
31  
32  
33  
34  
35  
36  
37  
38  
39  
40  
41  
42  
43  
44  
45  
46  
47  
48  
49  
50  
51  
52  
53  
54  
55  
56  
57  
58  
59  
60

## DISCUSSION

We developed a highly accurate algorithm to define the BP response to spironolactone in patients with aTRH using the EMR. The mean decreases in SBP and DBP for the total study population, 8.1 mmHg and 3.4 mmHg, respectively, are consistent with responses reported in prior clinical trials, such as the PATHWAY-2 trial.<sup>1</sup> In total, 30.3% of patients prescribed spironolactone did not achieve a five mmHg decrease in SBP or two mmHg decrease in DBP in the six months following spironolactone initiation. Higher pretreatment SBP and DBP predicted a greater therapeutic response to spironolactone, measured either as a dichotomous or continuous variable.

In addition, using the electronic algorithm, we were able to detect not only the BP response, but also changes in serum sodium, potassium, and creatinine after spironolactone initiation. Regardless of race, the response to spironolactone was associated with a greater decrease in serum sodium and greater increase in serum potassium, consistent with MR antagonism. These changes are also consistent with a decrease in epithelial sodium channel (ENaC) activity. In the present study, however, we are unable to determine if this inadequate BP response is due to inadequate spironolactone dose, spironolactone noncompliance, or non-MR mediated ENaC activation. Further, we found a significant correlation between decreasing BP and increasing creatinine after starting spironolactone in all groups. This correlation is likely a result from hemodynamic effects of BP medications and especially from blocking the renin-angiotensin-aldosterone system (RAAS).<sup>1</sup>

1  
2  
3 Race was not significantly associated with BP response to spironolactone nor  
4 electrolyte changes which suggests spironolactone exerts a consistent BP lowering effect  
5 regardless of race. These findings are supported by those of Nishizaka, et al. who  
6 determined that low-dose spironolactone provided a significant decrease in BP in AA and  
7 EA with resistant hypertension with and without primary aldosteronism.<sup>4</sup>  
8  
9  
10  
11  
12  
13

14 In EA, we also observed a significant correlation between the SBP response and  
15 decreasing glucose; whereas, among those in whom HbA1c was measured before and  
16 after therapy, HbA1c declined in nonresponders but not responders. The latter  
17 observation may reflect the fact that responders had a higher baseline HbA1c than non-  
18 responders. While these findings may suggest a potential benefit to glucose management  
19 from MR antagonism it is important to note that the exact relationship between MR  
20 antagonism and glucose is not perfectly understood. Because our findings, as well as  
21 others, suggest an association between spironolactone use and glucose levels, additional  
22 studies to better characterize this relationship are warranted.  
23  
24  
25  
26  
27  
28  
29  
30  
31  
32  
33  
34

35 A limitation of this study and many other studies of aTRH is the inability to  
36 measure adherence directly in the patients prescribed spironolactone without measuring  
37 drug levels, which is not routinely done in clinical practice. Nonadherence alone does  
38 not likely explain the lack of BP response in nonresponders, however. First, patients  
39 nonadherent to spironolactone would likely be nonadherent to other medications.  
40 Nonadherent patients, therefore, would be expected to have higher baseline BPs than  
41 adherent patients. To the contrary, we found that nonresponders had lower baseline SBP  
42 and DBP than responders and baseline SBP and DBP significantly predicted BP  
43 response. In addition, initiation of spironolactone resulted in an increase in serum  
44  
45  
46  
47  
48  
49  
50  
51  
52  
53  
54  
55  
56  
57  
58  
59  
60

1  
2  
3 potassium and decrease in serum sodium in non-responders as well as responders, albeit  
4  
5 to a lesser degree. Taken together these findings suggest that nonadherence is not the  
6  
7 predominant driver of the lack of BP response in non-responders.  
8  
9

10 Another way to assess adequacy of spironolactone dose is to assess whether renin  
11  
12 activity remains suppressed. Unfortunately, an insufficient number of patients had renin  
13  
14 measured during the baseline and response periods to assess change in renin  
15  
16 concentration or activity. The limited number of renin measurements in the EMR is  
17  
18 reflective of poor screening rates for primary aldosteronism.<sup>18</sup> Previous studies have  
19  
20 reported limited value in the addition of aldosterone levels or the ARR to prediction  
21  
22 models of BP response to MR antagonism in aTRH, however.<sup>19,20</sup>  
23  
24  
25

26 Other limitations of the study include the exclusion of a significant number of  
27  
28 patients with aTRH due to inadequate documentation of pre- and post-treatment BPs,  
29  
30 which limits our power of detection for some responses. The relatively small number of  
31  
32 AA, for example, limits the power to detect predictors of response to spironolactone in  
33  
34 this group.  
35  
36

37 The advantage of this approach is that it is an accurate, rapid, high throughput,  
38  
39 and inexpensive approach for quantifying clinical response to medications and determine  
40  
41 responders and nonresponders. The identified population can then be used as a research  
42  
43 cohort to investigate other relevant topics including pharmacogenetic inquiries, long term  
44  
45 outcome and event studies, as well as evaluate medication levels to determine compliance  
46  
47 or the presence of rapid or insufficient metabolizers. Further, the method can easily be  
48  
49 adapted for use with other medication types and in other EMR systems. These  
50  
51 adaptations could also allow for inquires related to personnel and infrastructure  
52  
53  
54  
55  
56  
57  
58  
59  
60



1  
2  
3 performance, e.g. when the algorithm is adapted for evaluation of a response for a  
4 medication used exclusively in-hospital.  
5  
6

7  
8 In conclusion, we have developed a highly accurate algorithm for the assessment  
9  
10 of BP response to spironolactone, a commonly prescribed medication, in patients with  
11 aTRH using EMR. Electrolyte changes associated with the BP response to spironolactone  
12 are consistent with its mechanism of action to block the MR and decrease activity of  
13 ENaC. A strength of this algorithm is its applicability to evaluate BP and electrolyte  
14 responses to medications other than spironolactone as well as its utility to evaluate the  
15 long-term clinical consequences of medication use. Further, this electronic algorithm  
16 could be amended for use in other EMR systems.  
17  
18  
19  
20  
21  
22  
23  
24  
25  
26  
27  
28  
29  
30  
31  
32  
33  
34  
35  
36  
37  
38  
39  
40  
41  
42  
43  
44  
45  
46  
47  
48  
49  
50  
51  
52  
53  
54  
55  
56  
57  
58  
59  
60

1  
2  
3 **ACKNOWLEDGEMENTS**  
4  
5

6 None  
7  
8  
9  
10  
11  
12  
13  
14  
15  
16  
17  
18  
19  
20  
21  
22  
23  
24  
25  
26  
27  
28  
29  
30  
31  
32  
33  
34  
35  
36  
37  
38  
39  
40  
41  
42  
43  
44  
45  
46  
47  
48  
49  
50  
51  
52  
53  
54  
55  
56  
57  
58  
59  
60

For peer review only

## SOURCES OF FUNDING

This study was supported by the National Institutes of Health (DK108444-01A1). The dataset used for the analyses described were obtained from the Vanderbilt University Medical Center Synthetic Derivative, which is supported by institutional funding, the 1S10RR025141-01 instrumentation award, and by the CTSA grant UL1TR000445 from National Center for Advancing Translational Sciences/National Institutes of Health.

1  
2  
3 **DISCLOSURES**  
4  
5  
6  
7

8 None  
9  
10  
11  
12  
13  
14  
15  
16  
17  
18  
19  
20  
21  
22  
23  
24  
25  
26  
27  
28  
29  
30  
31  
32  
33  
34  
35  
36  
37  
38  
39  
40  
41  
42  
43  
44  
45  
46  
47  
48  
49  
50  
51  
52  
53  
54  
55  
56  
57  
58  
59  
60

For peer review only

## REFERENCES

1. Williams B, MacDonald TM, Morant S, Webb DJ, Sever P, McInnes G, Ford I, Cruickshank JK, Caulfield MJ, Salsbury J, Mackenzie I, Padmanabhan S, Brown MJ, British Hypertension Society's PSG. Spironolactone versus placebo, bisoprolol, and doxazosin to determine the optimal treatment for drug-resistant hypertension (PATHWAY-2): A randomised, double-blind, crossover trial. *Lancet*. 2015;386:2059-2068. doi:10.1016/S0140-6736(15)00257-3
2. Chapman N, Dobson J, Wilson S, Dahlof B, Sever PS, Wedel H, Poulter NR, Anglo-Scandinavian Cardiac Outcomes Trial I. Effect of spironolactone on blood pressure in subjects with resistant hypertension. *Hypertension*. 2007;49:839-845. doi:10.1161/01.HYP.0000259805.18468.8c
3. de Souza F, Muxfeldt E, Fiszman R, Salles G. Efficacy of spironolactone therapy in patients with true resistant hypertension. *Hypertension*. 2010;55:147-152. doi:10.1161/HYPERTENSIONAHA.109.140988
4. Nishizaka MK, Zaman MA, Calhoun DA. Efficacy of low-dose spironolactone in subjects with resistant hypertension. *Am J Hypertens*. 2003;16:925-930.
5. Saha C, Eckert GJ, Ambrosius WT, Chun TY, Wagner MA, Zhao Q, Pratt JH. Improvement in blood pressure with inhibition of the epithelial sodium channel in blacks with hypertension. *Hypertension*. 2005;46:481-487. doi:10.1161/01.HYP.0000179582.42830.1d
6. Shuey MM, Gandelman JS, Chung CP, Nian H, Yu C, Denny JC, Brown NJ. Characteristics and treatment of African-American and European-American

- 1  
2  
3 patients with resistant hypertension identified using the electronic health record in  
4 an academic health centre: A case-control study. *BMJ Open*.  
5  
6 2018;0doi:10.1136/bmjopen-2018-021640  
7  
8  
9
- 10 7. Roden DM, Pulley JM, Basford MA, Bernard GR, Clayton EW, Balsler JR, Masys  
11 DR. Development of a large-scale de-identified DNA biobank to enable  
12 personalized medicine. *Clin Pharmacol Ther*. 2008;84:362-369.  
13  
14 doi:10.1038/clpt.2008.89  
15  
16
- 17 8. Stenner SP, Doan S, Johnson KB, Waitman LA, Denny JC. Medex: A medication  
18 information extraction system for clinical narratives. *J Am Med Inform Assoc*.  
19 2010;17:19-24.  
20  
21  
22
- 23 9. Xu H, Doan S, Birdwell KA, Cowan JD, Vincz AJ, Haas DW, Basford MA,  
24 Denny JC. An automated approach to calculating the daily dose of tacrolimus in  
25 electronic health records. *AMIA Jt Summits Transl Sci Proc*. 2010;2010:71-75.  
26  
27  
28
- 29 10. Xu H, Jiang M, Oetjens M, Bowton EA, Ramirez AH, Jeff JM, Basford MA,  
30 Pulley JM, Cowan JD, Wang X, Ritchie MD, Masys DR, Roden DM, Crawford  
31 DC, Denny JC. Facilitating pharmacogenetic studies using electronic health  
32 records and natural-language processing: A case study of warfarin. *J Am Med  
33 Inform Assoc*. 2011;18:387-391. doi:10.1136/amiajnl-2011-000208  
34  
35  
36  
37  
38  
39
- 40 11. Levey AS, Bosch JP, Lewis JB, Greene T, Rogers N, Roth D. A more accurate  
41 method to estimate glomerular filtration rate from serum creatinine: A new  
42 prediction equation. Modification of diet in renal disease study group. *Ann Intern  
43 Med*. 1999;130:461-470.  
44  
45  
46  
47  
48  
49  
50  
51  
52  
53  
54  
55  
56  
57  
58  
59  
60

- 1  
2  
3 12. Tang H, Quertermous T, Rodriguez B, Kardia SL, Zhu X, Brown A, Pankow JS,  
4 Province MA, Hunt SC, Boerwinkle E, Schork NJ, Risch NJ. Genetic structure,  
5 self-identified race/ethnicity, and confounding in case-control association studies.  
6 *Am J Hum Genet.* 2005;76:268-275. doi:10.1086/427888  
7  
8  
9  
10  
11  
12 13. Dumitrescu L, Ritchie MD, Brown-Gentry K, Pulley JM, Basford M, Denny JC,  
13 Oksenberg JR, Roden DM, Haines JL, Crawford DC. Assessing the accuracy of  
14 observer-reported ancestry in a biorepository linked to electronic medical records.  
15 *Genet Med.* 2010;12:648-650. doi:10.1097/GIM.0b013e3181efe2df  
16  
17  
18  
19  
20  
21 14. Birdwell KA, Grady B, Choi L, Xu H, Bian A, Denny JC, Jiang M, Vranic G,  
22 Basford M, Cowan JD, Richardson DM, Robinson MP, Ikizler TA, Ritchie MD,  
23 Stein CM, Haas DW. The use of a DNA biobank linked to electronic medical  
24 records to characterize pharmacogenomic predictors of tacrolimus dose  
25 requirement in kidney transplant recipients. *Pharmacogenet Genomics.*  
26 2012;22:32-42. doi:10.1097/FPC.0b013e32834e1641  
27  
28  
29  
30  
31  
32  
33 15. Speltz P, Rasmussen LV, Basford M, Gottesman O, Peissig PL, Pacheco JA,  
34 Tromp G, Pathak J, Carrell DS, Ellis SB, Lingren T, Thompson WK, Savova G,  
35 Haines J, Roden DM, Harris PA, Denny JC. Phekb: A catalog and workflow for  
36 creating electronic phenotype algorithms for transportability. *J Am Med Inform*  
37 *Assoc.* 2016;23:1046-1052.  
38  
39  
40  
41  
42  
43  
44  
45  
46  
47 16. Team RC. R: A language and environment for statistical computing [internet].  
48 Vienna, austria; 2014. 2017  
49  
50  
51  
52  
53  
54  
55  
56  
57  
58  
59  
60

- 1  
2  
3 17. Chobanian, Aram V., et al. "The seventh report of the joint national committee on  
4 prevention, detection, evaluation, and treatment of high blood pressure: the JNC 7  
5 report." *JAMA* 2003; 289(19), 2560-2571. doi:10.1001/jama.289.19.2560  
6  
7  
8  
9
- 10 18. Ruhle BC, White MG, Alsafran S, Kaplan EL, Angelos P, Grogan RH. Keeping  
11 primary aldosteronism in mind: Deficiencies in screening at-risk hypertensives.  
12 *Surgery*. 2019;165:221-227. doi:10.1016/j.surg.2018.05.085  
13  
14  
15
- 16 19. Parthasarathy HK, Alhashmi K, McMahon AD, Struthers AD, McInnes GT, Ford  
17 I, Connell JM, MacDonald TM. Does the ratio of serum aldosterone to plasma  
18 renin activity predict the efficacy of diuretics in hypertension? Results of  
19 RENALDO. *J Hypertens*. 2010;28:170-177.  
20  
21  
22  
23  
24  
25  
26  
27  
28  
29  
30  
31  
32  
33  
34  
35  
36  
37  
38  
39  
40  
41  
42  
43  
44  
45  
46  
47  
48  
49  
50  
51  
52  
53  
54  
55  
56  
57  
58  
59  
60
20. Vaclavik J, Sedlak R, Jarkovsky J, Kocianova E, Taborsky M. Effect of  
spironolactone in resistant arterial hypertension: A randomized, double-blind,  
placebo-controlled trial (ASPIRANT-EXT)). *Medicine (Baltimore)*.  
2014;93:e162. doi:10.1097/MD.0000000000000162



## FIGURE LEGENDS

**Figure 1. Schematic of the spironolactone response algorithm and identification of the baseline and response periods for patients.** The earliest date a patient was prescribed spironolactone is indicated by the novel start date (NSD). The baseline period is determined by identifying all visits in which same three medication classes as prescribed to the patient as on the NSD. If the visit date for the start of the baseline period occurred more than six months before the NSD a baseline period of six months was used. The determination of the response period is not shown in the schematic above. Similar logic was applied to the selection of this period.

**Figure 2. Diagram of the algorithm for the identification of patients with apparent therapy-resistant hypertension (aTRH) in the VUMC Synthetic Derivative (SD) prescribed spironolactone during a period of stable medication use for the evaluation of blood pressure response.**

**Figure 3. The significant correlations with systolic blood pressure change in the total population.** Correlation between the change in systolic blood pressure (SBP) after starting spironolactone and baseline A) SBP [correlation coefficient (CC)= -0.415,  $p < 0.001$ ], and the change in B) creatinine (CC= -5.039,  $p = 0.01$ ), C) serum sodium (CC= 0.701,  $p < 0.001$ ), and D) serum potassium (CC= -3.483,  $p = 0.004$ ).

## STATEMENTS

### Contributorship

MMS and NJB contributed to the design of the study; MMS, BP, HN, CY, JML, and NJB contributed to the analysis and interpretation of the results; MMS and NJB contributed to the drafting of the manuscript; MMS, BP, HN, CY, JML, and NJB contributed to the editing of the manuscript and final approval for submission

### Competing Interests

All authors have completed the ICMJE uniform disclosure form at [www.icmje.org/coi\\_disclosure.pdf](http://www.icmje.org/coi_disclosure.pdf) and declare: Dr Brown reports consulting for Shire HGT, Novartis Pharmaceuticals, Viamet Pharmaceuticals and serving on the Scientific Advisory Board of Alnylam Pharmaceuticals. Dr. Brown also sits on the Joint Scientific Committee for the Vanderbilt Bayer Alliance. All authors report no support from any organization for the submitted work; no financial relationships with any organizations that might have an interest in the submitted work in the previous three years; no other relationships or activities that could appear to have influenced the submitted work.

### Patient Consent

No identifiable patient data was used in the study.

### Ethical Approval

1  
2  
3 The study was approved by the Vanderbilt University Medical Center Institutional  
4  
5 Review Board (#130848).  
6  
7  
8  
9

### 10 **Transparency Declaration**

11  
12 M. Shuey affirms that the manuscript is an honest, accurate, and transparent account of  
13  
14 the study being reported; that no important aspects of the study have been omitted; and  
15  
16 that any discrepancies from the study as planned (and, if relevant, registered) have been  
17  
18 explained.  
19  
20  
21  
22  
23

### 24 **Data Sharing**

25  
26 The full data set is available upon request to the corresponding author.  
27  
28  
29  
30  
31  
32  
33  
34  
35  
36  
37  
38  
39  
40  
41  
42  
43  
44  
45  
46  
47  
48  
49  
50  
51  
52  
53  
54  
55  
56  
57  
58  
59  
60

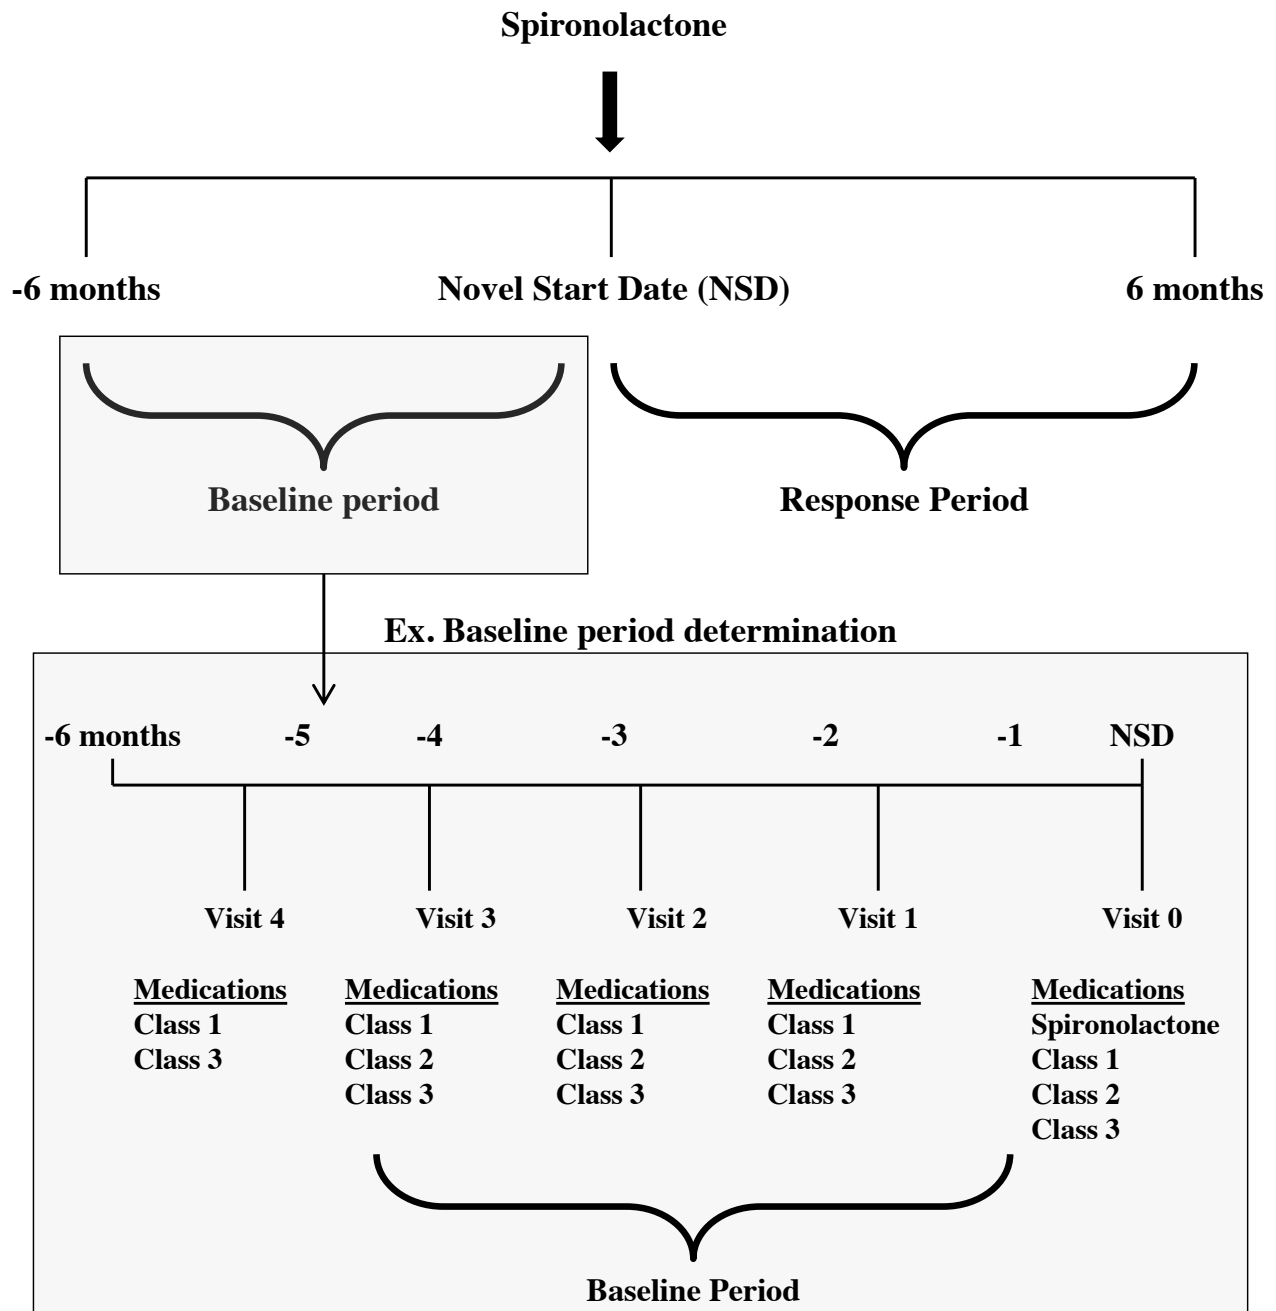

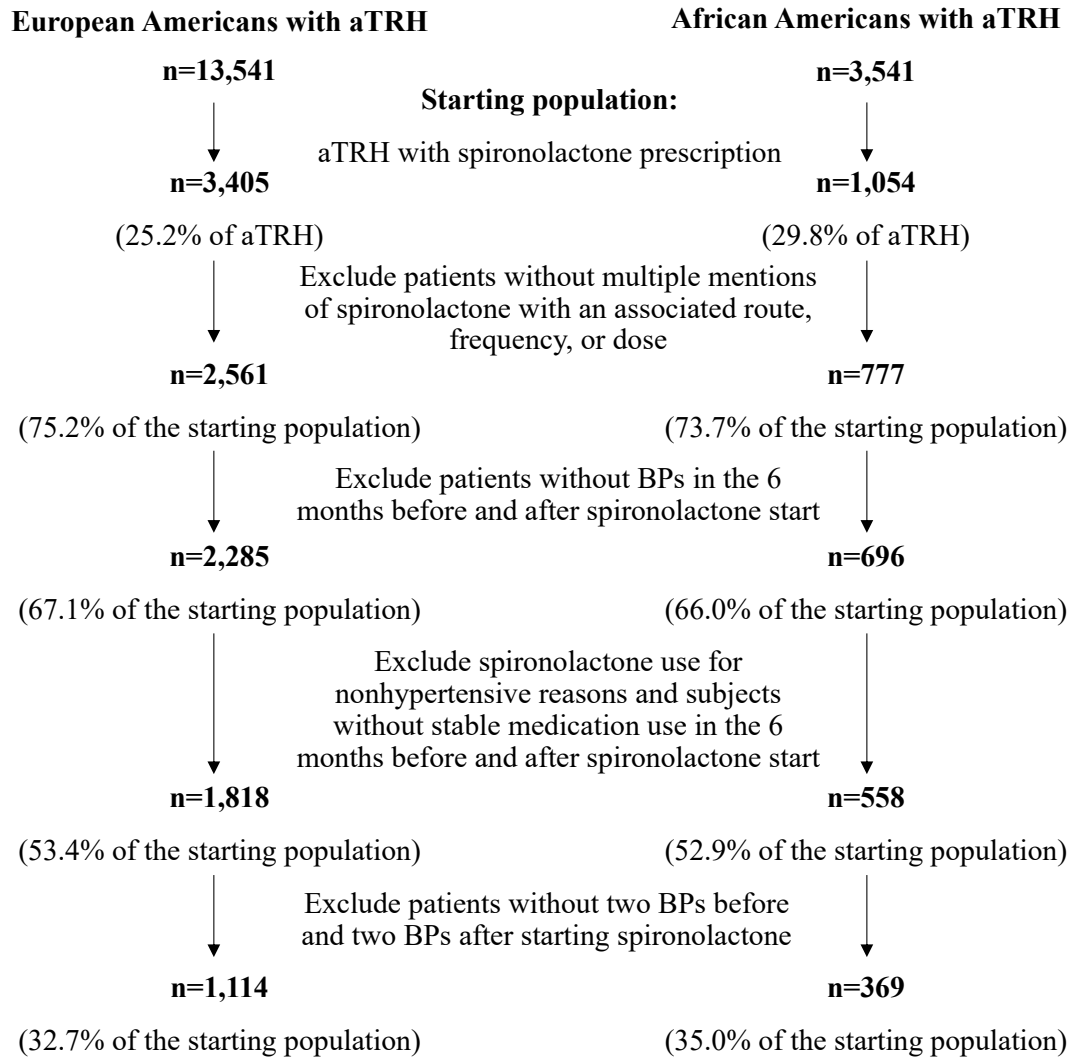

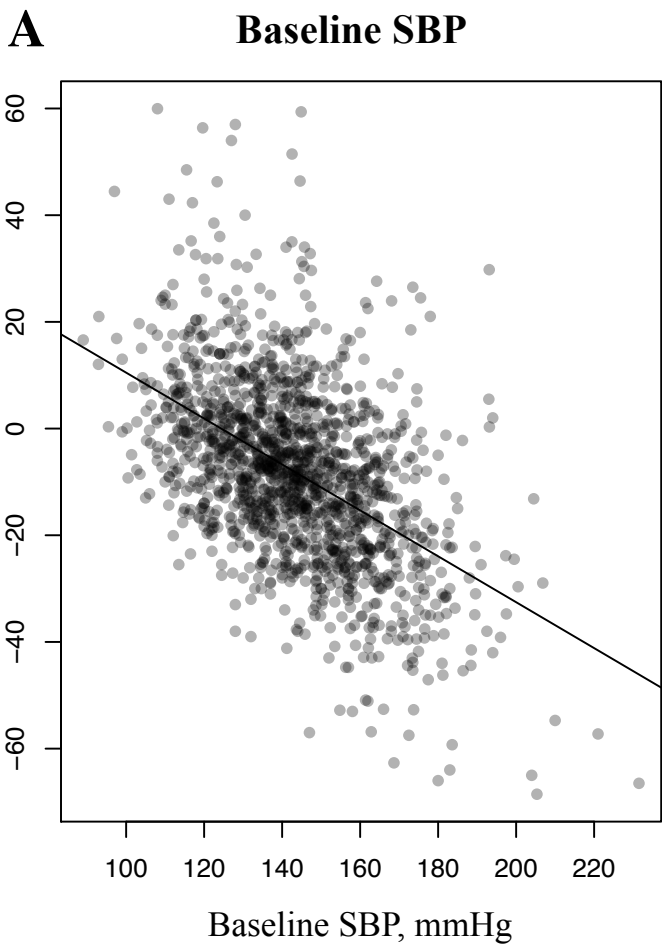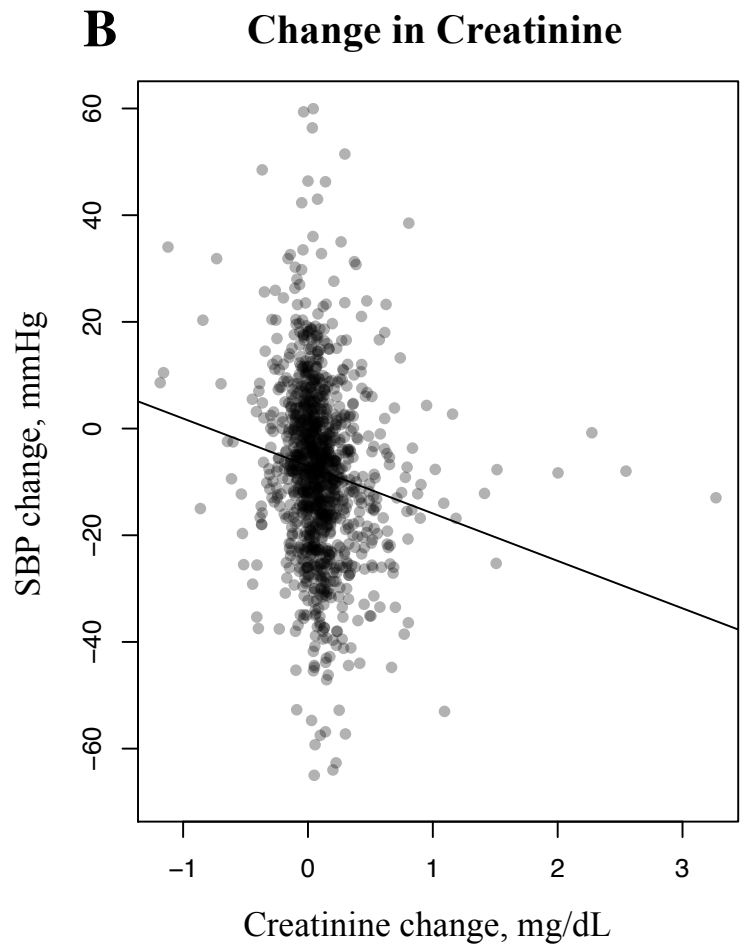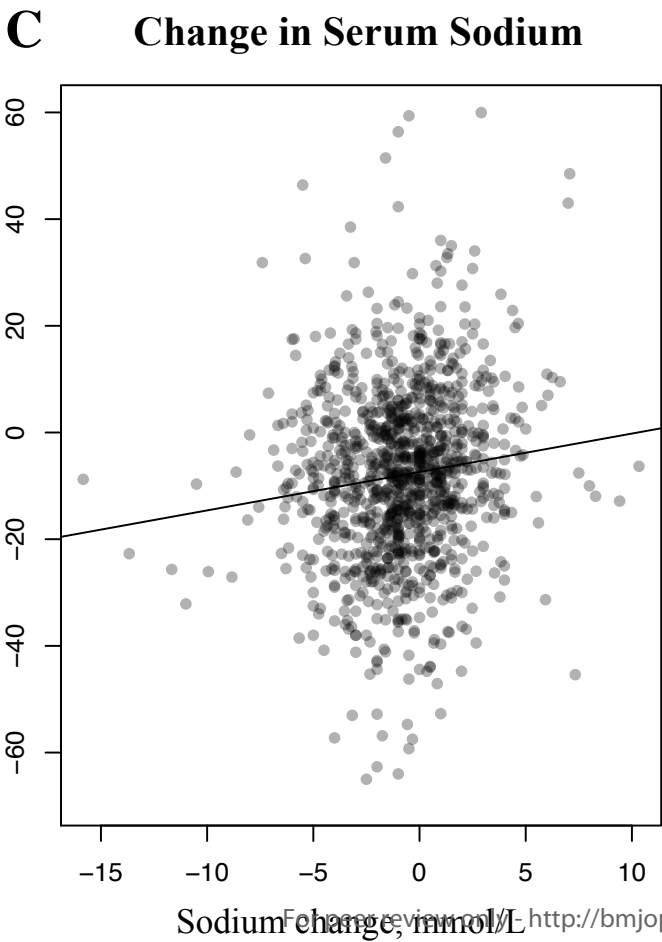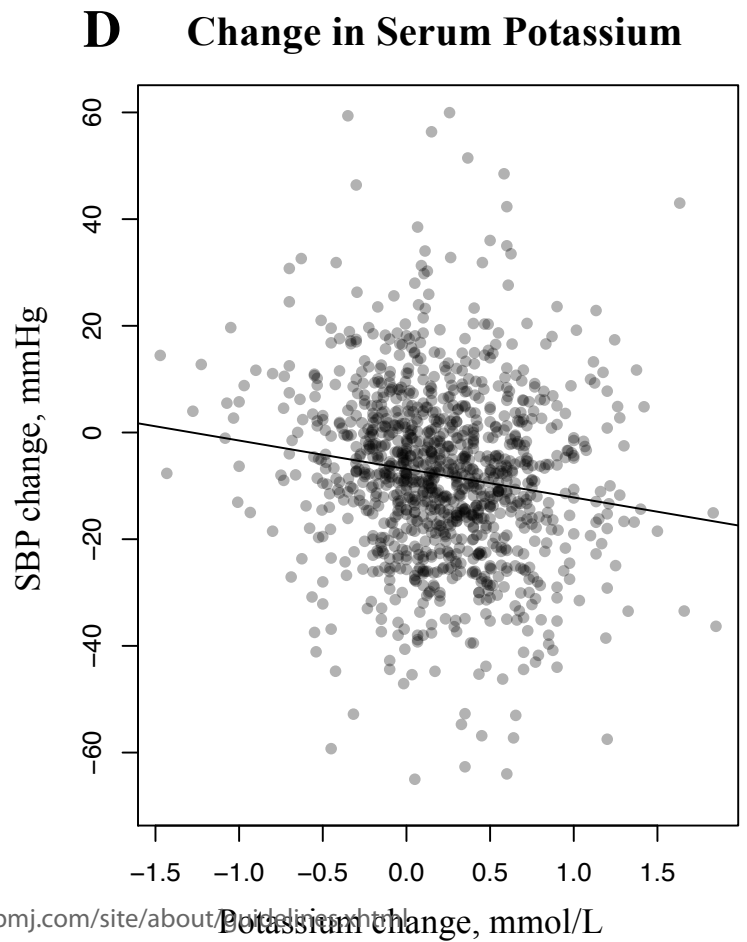

## DATA SUPPLEMENT

1  
2 **Supplemental Table 1. International Classifiers of Disease (ICD)-9 and -10 exclusions for resistant**  
3  
4 **hypertensive subjects**  
5

| Description                                                                                                                              | ICD-9-CM codes                                   | ICD-10-CM-codes                                 |
|------------------------------------------------------------------------------------------------------------------------------------------|--------------------------------------------------|-------------------------------------------------|
| <i>Exclusion for Case Type I, Case Type II, and Control if ever present in a patient record</i>                                          |                                                  |                                                 |
| Malignant neoplasm of unspecified adrenal gland                                                                                          | 194.0                                            | C74.9                                           |
| Benign neoplasm of unspecified adrenal gland                                                                                             | 227.0                                            | D35.00                                          |
| Disorders of the adrenal gland (excluding adrenal insufficiencies)                                                                       | 255.0, 255.1*, 255.2, 255.3, 255.6, 255.8, 255.9 | E24.*, E26.*, E25.*, E27.0, E27.5, E27.8, E27.9 |
| Secondary Hypertension                                                                                                                   | 405.*                                            | I15.0, I15.8                                    |
| Chronic pulmonary heart disease                                                                                                          | 416.*                                            | I27.*                                           |
| Nephrotic syndrome                                                                                                                       | 581.*                                            | N04.*, N08                                      |
| Chronic glomerulonephritis                                                                                                               | 582.*                                            | N03.*, N08                                      |
| Bulbus cordis anomalies                                                                                                                  | 745.*                                            | Q20.*, Q21.*                                    |
| Coarctation of aorta                                                                                                                     | 747.1*                                           | Q25.1, Q25.2                                    |
| <i>Exclusion for Case Type I and Case Type II if present in a patient record 5 years before or 1 year after identification as a Case</i> |                                                  |                                                 |
| Thyrotoxicosis                                                                                                                           | 242.*                                            | E05.*                                           |
| Disorder of thyrocalcitonin secretion                                                                                                    | 246.0                                            | E07.0                                           |
| Disorders of the thyroid NEC                                                                                                             | 246.8                                            | E03.4, E07.89                                   |
| Disorders of the thyroid NOS                                                                                                             | 246.9                                            | E07.9                                           |
| Parathyroid disorder NEC                                                                                                                 | 252.8                                            | E21.4                                           |
| Parathyroid disorder NOS                                                                                                                 | 252.9                                            | E21.5                                           |
| Obstructive uropathy                                                                                                                     | 599.6*                                           | N13.9                                           |

55 Abbreviations: NEC, not elsewhere classified; NOS, not otherwise classified  
56  
57  
58  
59  
60

1  
2  
3  
4  
5  
6  
7  
8  
9  
10  
11  
12  
13  
14  
15  
16  
17  
18  
19  
20  
21  
22  
23  
24  
25  
26  
27  
28  
29  
30  
31  
32  
33  
34  
35  
36  
37  
38  
39  
40  
41  
42  
43  
44  
45  
46  
47  
48  
49  
50  
51  
52  
53  
54  
55  
56  
57  
58  
59  
60

**Supplemental Table 2. International Classifiers of Disease (ICD)-9 and ICD-10 codes used for history of diagnosis**

| <b>Diagnosis</b>               | <b>ICD-9 codes</b> | <b>ICD-10 codes</b> | <b>Other</b>                         |
|--------------------------------|--------------------|---------------------|--------------------------------------|
| Chronic kidney disease stage 3 | 585.1              | N18.1               | eGFR > 30 mL/min/1.73 m <sup>2</sup> |
|                                | 585.2              | N18.2               | but < 60 mL/min/1.73 m <sup>2</sup>  |
| Ischemic heart disease         | 410.*              | I20.*               |                                      |
|                                | 411.*              | I22.*               |                                      |
|                                | 413.*              | I24.*               |                                      |
|                                | 414.*              | I25.*               |                                      |
| Type 2 diabetes mellitus       | 250                | E11                 |                                      |
|                                | 250.*              | E11.*               |                                      |
|                                | 327.2*             | G47.3*              |                                      |
| Smoking                        | 305.1              | F17.*               |                                      |
|                                | V15.82             | Z87.891             |                                      |

Abbreviations: eGFR, estimated glomerular filtration rate



**Supplemental Table 3. The daily dose and frequency of thiazide diuretic and dihydropyridine calcium channel blocker prescription in patients with apparent treatment-resistant hypertension prior to spironolactone prescription**

| Medication                              | Daily dose | Patients prescribed, n (%) <sup>*</sup> |
|-----------------------------------------|------------|-----------------------------------------|
| Thiazide diuretic                       |            | 884                                     |
|                                         | 12.5 mg    | 86 (9.7)                                |
|                                         | 25 mg      | 566 (64.0)                              |
|                                         | 50 mg      | 78 (8.8)                                |
|                                         | unknown    | 154 (17.4)                              |
| Dihydropyridine calcium channel blocker |            | 980                                     |
| Amlodipine                              |            |                                         |
|                                         | 2.5 mg     | 8 (0.8)                                 |
|                                         | 5 mg       | 99 (10.1)                               |
|                                         | 7.5 mg     | 3 (0.3)                                 |
|                                         | 10 mg      | 312 (31.8)                              |
|                                         | unknown    | 52 (5.3)                                |
| Nifedipine                              |            |                                         |
|                                         | 30 mg      | 38 (3.9)                                |
|                                         | 60 mg      | 100 (10.2)                              |
|                                         | 90 mg      | 110 (11.2)                              |
|                                         | 120 mg     | 25 (2.6)                                |
|                                         | unknown    | 233 (23.8)                              |

<sup>\*</sup>The frequency of medication dose based on medication type, e.g. thiazide diuretic or dihydropyridine calcium channel blocker.

**Supplemental Table 4. Characteristics of spironolactone responders and nonresponders in****European Americans.**

| Variable                                                               | N     | Nonresponders<br>(n=343) | Responders<br>(n=771) | p-value* |
|------------------------------------------------------------------------|-------|--------------------------|-----------------------|----------|
| Age, years                                                             | 1,114 | 65.66 ± 13.09            | 66.21 ± 12.04         | 0.50     |
| Female, n (%)                                                          | 1,114 | 151 (44.0%)              | 368 (47.7%)           | 0.25     |
| BMI, kg/m <sup>2</sup>                                                 | 1,023 | 31.3 ± 7.2               | 32.5 ± 7.7            | 0.01     |
| Diagnostic History                                                     |       |                          |                       |          |
| T2DM, n (%)                                                            | 1,114 | 173 (50.4%)              | 393 (51.0%)           | 0.87     |
| CKD3, n (%)                                                            | 1,114 | 124 (36.2%)              | 296 (38.4%)           | 0.48     |
| IHD, n (%)                                                             | 1,114 | 149 (43.4%)              | 280 (36.3%)           | 0.02     |
| Smoking, n (%)                                                         | 1,114 | 75 (21.9%)               | 157 (20.4%)           | 0.57     |
| Baseline measures                                                      |       |                          |                       |          |
| SBP, mmHg                                                              | 1,114 | 131.37 ± 16.99           | 145.91 ± 18.52        | < 0.001  |
| DBP, mmHg                                                              | 1,114 | 69.46 ± 10.88            | 76.78 ± 12.52         | < 0.001  |
| Serum sodium, mmol/L                                                   | 872   | 138.45 ± 3.26            | 139.04 ± 3.00         | 0.01     |
| Serum potassium, mmol/L                                                | 871   | 3.99 ± 0.46              | 3.93 ± 0.43           | 0.07     |
| Creatinine, mg/dL                                                      | 878   | 1.11 ± 0.37              | 1.07 ± 0.37           | 0.11     |
| eGFR, mL/min/1.73m <sup>2</sup>                                        | 1,029 | 75.16 ± 24.47            | 75.23 ± 19.83         | 0.96     |
| Glucose, mg/dL                                                         | 875   | 124.46 ± 56.69           | 126.59 ± 48.81        | 0.57     |
| HbA1c, %                                                               | 383   | 6.76 ± 1.67              | 7.24 ± 3.54           | 0.10     |
| HDL cholesterol, mg/dL                                                 | 420   | 46.96 ± 18.89            | 44.11 ± 14.83         | 0.10     |
| LDL cholesterol, mg/dL                                                 | 390   | 92.09 ± 37.86            | 95.30 ± 34.75         | 0.43     |
| Triglycerides, mg/dL                                                   | 426   | 167.8 ± 117.0            | 182.5 ± 129.4         | 0.27     |
| Difference from baseline following initial spironolactone prescription |       |                          |                       |          |
| Serum sodium, mmol/L                                                   | 810   | -0.70 ± 2.63             | -1.12 ± 2.71          | 0.04     |

|    |                                 |     |                 |                 |         |
|----|---------------------------------|-----|-----------------|-----------------|---------|
| 1  | Serum potassium, mmol/L         | 812 | 0.12 ± 0.48     | 0.27 ± 0.43     | < 0.001 |
| 2  |                                 |     |                 |                 |         |
| 3  | Creatinine, mg/dL               | 816 | 0.01 ± 0.23     | 0.13 ± 0.32     | < 0.001 |
| 4  |                                 |     |                 |                 |         |
| 5  | eGFR, mL/min/1.73m <sup>2</sup> | 924 | -4.82 ± 15.68   | -8.76 ± 14.51   | < 0.001 |
| 6  |                                 |     |                 |                 |         |
| 7  | Glucose, mg/dL                  | 810 | 1.44 ± 47.52    | 0.01 ± 39.03    | 0.65    |
| 8  |                                 |     |                 |                 |         |
| 9  | HbA1c, %                        | 181 | -0.13 ± 1.31    | -0.05 ± 0.92    | 0.63    |
| 10 |                                 |     |                 |                 |         |
| 11 | HDL cholesterol, mg/dL          | 156 | 0.03 ± 9.35     | -0.94 ± 8.62    | 0.54    |
| 12 |                                 |     |                 |                 |         |
| 13 | LDL cholesterol, mg/dL          | 142 | -7.29 ± 35.21   | -8.63 ± 35.09   | 0.86    |
| 14 |                                 |     |                 |                 |         |
| 15 | Triglycerides, mg/dL            | 162 | -11.99 ± 107.79 | -22.93 ± 121.66 | 0.59    |
| 16 |                                 |     |                 |                 |         |
| 17 |                                 |     |                 |                 |         |
| 18 | <hr/>                           |     |                 |                 |         |

19  
20 Abbreviations: BMI, body mass index; CKD 3, chronic kidney disease stage three; DBP, diastolic  
21 blood pressure; eGFR, estimated glomerular filtration rate; HbA1c, hemoglobin A1c; HDL,  
22 high-density lipoprotein; IHD, ischemic heart disease; LDL, low-density lipoprotein; N, number of  
23 individuals with the specific measure; SBP, systolic blood pressure.  
24

25 Data are presented as mean ± standard deviation for continuous variables and count (%) for  
26 categorical variables.  
27

28 \* P-values from the multivariable regression model are provided for all variables except HbA1c,  
29 HDL cholesterol, LDL cholesterol, and triglycerides. Univariate p-values are provided for these  
30 variables.  
31  
32  
33  
34  
35  
36  
37  
38  
39  
40  
41  
42  
43  
44  
45  
46  
47  
48  
49  
50  
51  
52  
53  
54  
55  
56  
57  
58  
59  
60

**Supplemental Table 5. Characteristics of spironolactone responders and nonresponders in African Americans.**

| Variable                        | N   | Nonresponders<br>(n=106) | Responders<br>(n=263) | p-value* |
|---------------------------------|-----|--------------------------|-----------------------|----------|
| Age, years                      | 369 | 57.23 ± 11.30            | 58.65 ± 12.64         | 0.32     |
| Female, n (%)                   | 369 | 64 (60.3%)               | 164 (62.4%)           | 0.72     |
| BMI, kg/m <sup>2</sup>          | 335 | 35.3 ± 9.7               | 37.3 ± 9.2            | 0.40     |
| Diagnostic History              |     |                          |                       |          |
| T2DM, n (%)                     | 369 | 63 (59.4%)               | 173 (65.7%)           | 0.25     |
| CKD3, n (%)                     | 369 | 39 (36.8%)               | 102 (38.8%)           | 0.72     |
| IHD, n (%)                      | 369 | 30 (28.3%)               | 71 (27.0%)            | 0.80     |
| Smoking, n (%)                  | 369 | 21 (19.8%)               | 211 (20.5%)           | 0.87     |
| Baseline measures               |     |                          |                       |          |
| SBP, mmHg                       | 369 | 139.15 ± 17.46           | 152.51 ± 18.40        | < 0.001  |
| DBP, mmHg                       | 369 | 78.78 ± 11.67            | 85.50 ± 12.53         | < 0.001  |
| Serum sodium, mmol/L            | 304 | 139.37 ± 3.00            | 139.81 ± 2.85         | 0.23     |
| Serum potassium, mmol/L         | 304 | 3.81 ± 0.50              | 3.84 ± 0.44           | 0.58     |
| Creatinine, mg/dL               | 306 | 1.14 ± 0.33              | 1.16 ± 0.54           | 0.73     |
| eGFR, mL/min/1.73m <sup>2</sup> | 353 | 81.69 ± 20.78            | 83.42 ± 22.80         | 0.51     |
| Glucose, mg/dL                  | 304 | 129.05 ± 64.32           | 128.05 ± 55.37        | 0.89     |
| HbA1c, %                        | 155 | 7.45 ± 2.17              | 7.22 ± 1.65           | 0.50     |
| HDL cholesterol, mg/dL          | 155 | 49.07 ± 14.93            | 49.21 ± 15.95         | 0.56     |
| LDL cholesterol, mg/dL          | 147 | 106.51 ± 43.81           | 106.70 ± 33.43        | 0.98     |

|                                                                        |     |                 |                |      |
|------------------------------------------------------------------------|-----|-----------------|----------------|------|
| Triglycerides, mg/dL                                                   | 152 | 151.35 ± 92.16  | 135.01 ± 88.22 | 0.34 |
| Difference from baseline following initial spironolactone prescription |     |                 |                |      |
| Serum sodium, mmol/L                                                   | 291 | 0.17 ± 2.52     | -0.52 ± 2.63   | 0.05 |
| Serum potassium, mmol/L                                                | 292 | 0.16 ± 0.50     | 0.19 ± 0.39    | 0.57 |
| Creatinine, mg/dL                                                      | 292 | 0.06 ± 0.23     | 0.14 ± 0.26    | 0.01 |
| eGFR, mL/min/1.73m <sup>2</sup>                                        | 330 | -6.50 ± 15.89   | -9.99 ± 16.61  | 0.09 |
| Glucose, mg/dL                                                         | 291 | -5.56 ± 48.63   | -1.37 ± 44.65  | 0.48 |
| HbA1c, %                                                               | 103 | -0.54 ± 0.97    | 0.02 ± 1.23    | 0.09 |
| HDL cholesterol, mg/dL                                                 | 58  | 3.17 ± 17.66    | -1.67 ± 10.92  | 0.24 |
| LDL cholesterol, mg/dL                                                 | 55  | 0.04 ± 19.86    | -4.82 ± 34.85  | 0.65 |
| Triglycerides, mg/dL                                                   | 58  | -43.47 ± 109.99 | -11.64 ± 61.01 | 0.21 |

Abbreviations: BMI, body mass index; CKD 3, chronic kidney disease stage three; DBP, diastolic blood pressure; eGFR, estimated glomerular filtration rate; HbA1c, hemoglobin A1c; HDL, high-density lipoprotein; IHD, ischemic heart disease; LDL, low-density lipoprotein; N, number of individuals with the specific measure; SBP, systolic blood pressure.

Data are presented as mean ± standard deviation for continuous variables and count (%) for categorical variables.

\* P-values from the multivariable regression model are provided for all variables except HbA1c, HDL cholesterol, LDL cholesterol, and triglycerides. Univariate p-values are provided for these variables.

**STROBE 2007 (v4) Statement—Checklist of items that should be included in reports of *cohort studies***

| Section/Topic                | Item # | Recommendation                                                                                                                                                                       | Reported on page #         |
|------------------------------|--------|--------------------------------------------------------------------------------------------------------------------------------------------------------------------------------------|----------------------------|
| <b>Title and abstract</b>    | 1      | (a) Indicate the study's design with a commonly used term in the title or the abstract                                                                                               | 1,2                        |
|                              |        | (b) Provide in the abstract an informative and balanced summary of what was done and what was found                                                                                  | 2,3                        |
| <b>Introduction</b>          |        |                                                                                                                                                                                      |                            |
| Background/rationale         | 2      | Explain the scientific background and rationale for the investigation being reported                                                                                                 | 5                          |
| Objectives                   | 3      | State specific objectives, including any prespecified hypotheses                                                                                                                     | 5                          |
| <b>Methods</b>               |        |                                                                                                                                                                                      |                            |
| Study design                 | 4      | Present key elements of study design early in the paper                                                                                                                              | 5-6, 7                     |
| Setting                      | 5      | Describe the setting, locations, and relevant dates, including periods of recruitment, exposure, follow-up, and data collection                                                      | 7                          |
| Participants                 | 6      | (a) Give the eligibility criteria, and the sources and methods of selection of participants. Describe methods of follow-up                                                           | 7-11                       |
|                              |        | (b) For matched studies, give matching criteria and number of exposed and unexposed                                                                                                  |                            |
| Variables                    | 7      | Clearly define all outcomes, exposures, predictors, potential confounders, and effect modifiers. Give diagnostic criteria, if applicable                                             | 7-11                       |
| Data sources/<br>measurement | 8*     | For each variable of interest, give sources of data and details of methods of assessment (measurement). Describe comparability of assessment methods if there is more than one group | 7-11, Supplemental Table 1 |
| Bias                         | 9      | Describe any efforts to address potential sources of bias                                                                                                                            |                            |
| Study size                   | 10     | Explain how the study size was arrived at                                                                                                                                            | 7-9, 13, Figure 2          |
| Quantitative variables       | 11     | Explain how quantitative variables were handled in the analyses. If applicable, describe which groupings were chosen and why                                                         | 9, 11                      |
| Statistical methods          | 12     | (a) Describe all statistical methods, including those used to control for confounding                                                                                                | 11                         |
|                              |        | (b) Describe any methods used to examine subgroups and interactions                                                                                                                  | 11                         |
|                              |        | (c) Explain how missing data were addressed                                                                                                                                          | 11                         |
|                              |        | (d) If applicable, explain how loss to follow-up was addressed                                                                                                                       |                            |
|                              |        | (e) Describe any sensitivity analyses                                                                                                                                                | 10-11                      |
| <b>Results</b>               |        |                                                                                                                                                                                      |                            |

|                          |     |                                                                                                                                                                                                                                                                                                                                                                                                               |                                                      |
|--------------------------|-----|---------------------------------------------------------------------------------------------------------------------------------------------------------------------------------------------------------------------------------------------------------------------------------------------------------------------------------------------------------------------------------------------------------------|------------------------------------------------------|
| Participants             | 13* | (a) Report numbers of individuals at each stage of study—eg numbers potentially eligible, examined for eligibility, confirmed eligible, included in the study, completing follow-up, and analysed<br>(b) Give reasons for non-participation at each stage<br>(c) Consider use of a flow diagram                                                                                                               | 13, Figure 2<br>Figure 2<br>Figure 2                 |
| Descriptive data         | 14* | (a) Give characteristics of study participants (eg demographic, clinical, social) and information on exposures and potential confounders<br>(b) Indicate number of participants with missing data for each variable of interest<br>(c) Summarise follow-up time (eg, average and total amount)                                                                                                                | 14, Tables 1 and 2<br>Tables 1 and 2<br>13, Figure 2 |
| Outcome data             | 15* | Report numbers of outcome events or summary measures over time                                                                                                                                                                                                                                                                                                                                                | 13-19                                                |
| Main results             | 16  | (a) Give unadjusted estimates and, if applicable, confounder-adjusted estimates and their precision (eg, 95% confidence interval). Make clear which confounders were adjusted for and why they were included<br>(b) Report category boundaries when continuous variables were categorized<br>(c) If relevant, consider translating estimates of relative risk into absolute risk for a meaningful time period | 14-20, Table 1, 2, and 3<br>13                       |
| Other analyses           | 17  | Report other analyses done—eg analyses of subgroups and interactions, and sensitivity analyses                                                                                                                                                                                                                                                                                                                | Table 3, Supplemental tables 3 and 4                 |
| <b>Discussion</b>        |     |                                                                                                                                                                                                                                                                                                                                                                                                               |                                                      |
| Key results              | 18  | Summarise key results with reference to study objectives                                                                                                                                                                                                                                                                                                                                                      | 24-27                                                |
| <b>Limitations</b>       |     |                                                                                                                                                                                                                                                                                                                                                                                                               |                                                      |
| Interpretation           | 20  | Give a cautious overall interpretation of results considering objectives, limitations, multiplicity of analyses, results from similar studies, and other relevant evidence                                                                                                                                                                                                                                    | 4, 26-27                                             |
| Generalisability         | 21  | Discuss the generalisability (external validity) of the study results                                                                                                                                                                                                                                                                                                                                         | 4, 26-27                                             |
| <b>Other information</b> |     |                                                                                                                                                                                                                                                                                                                                                                                                               |                                                      |
| Funding                  | 22  | Give the source of funding and the role of the funders for the present study and, if applicable, for the original study on which the present article is based                                                                                                                                                                                                                                                 | 29                                                   |

\*Give information separately for cases and controls in case-control studies and, if applicable, for exposed and unexposed groups in cohort and cross-sectional studies.

**Note:** An Explanation and Elaboration article discusses each checklist item and gives methodological background and published examples of transparent reporting. The STROBE checklist is best used in conjunction with this article (freely available on the Web sites of PLoS Medicine at <http://www.plosmedicine.org/>, Annals of Internal Medicine at <http://www.annals.org/>, and Epidemiology at <http://www.epidem.com/>). Information on the STROBE Initiative is available at [www.strobe-statement.org](http://www.strobe-statement.org).
