# Supplementary material for: Retrospective cohort study to characterise the blood pressure response to spironolactone in patients with apparent therapy-resistant hypertension using electronic medical record data
Source: PubMed Central journal article supplement — BMJ Open. 2020 May 26;10(5):e033100. doi: 10.1136/bmjopen-2019-033100 (PMC7259833; doi:10.1136/bmjopen-2019-033100), 2020-05-26
Supplement: bmjopen-2019-033100supp001.pdf [file bmjopen-2019-033100supp001.pdf]

## DATA SUPPLEMENT

**Supplemental Table 1. International Classifiers of Disease (ICD)-9 and -10 exclusions for resistant hypertensive subjects**

| Description                                                                                                                              | ICD-9-CM codes                                   | ICD-10-CM-codes                                 |
|------------------------------------------------------------------------------------------------------------------------------------------|--------------------------------------------------|-------------------------------------------------|
| <i>Exclusion for Case Type I, Case Type II, and Control if ever present in a patient record</i>                                          |                                                  |                                                 |
| Malignant neoplasm of unspecified adrenal gland                                                                                          | 194.0                                            | C74.9                                           |
| Benign neoplasm of unspecified adrenal gland                                                                                             | 227.0                                            | D35.00                                          |
| Disorders of the adrenal gland (excluding adrenal insufficiencies)                                                                       | 255.0, 255.1*, 255.2, 255.3, 255.6, 255.8, 255.9 | E24.*, E26.*, E25.*, E27.0, E27.5, E27.8, E27.9 |
| Secondary Hypertension                                                                                                                   | 405.*                                            | I15.0, I15.8                                    |
| Chronic pulmonary heart disease                                                                                                          | 416.*                                            | I27.*                                           |
| Nephrotic syndrome                                                                                                                       | 581.*                                            | N04.*, N08                                      |
| Chronic glomerulonephritis                                                                                                               | 582.*                                            | N03.*, N08                                      |
| Bulbus cordis anomalies                                                                                                                  | 745.*                                            | Q20.*, Q21.*                                    |
| Coarctation of aorta                                                                                                                     | 747.1*                                           | Q25.1, Q25.2                                    |
| <i>Exclusion for Case Type I and Case Type II if present in a patient record 5 years before or 1 year after identification as a Case</i> |                                                  |                                                 |
| Thyrotoxicosis                                                                                                                           | 242.*                                            | E05.*                                           |
| Disorder of thyrocalcitonin secretion                                                                                                    | 246.0                                            | E07.0                                           |
| Disorders of the thyroid NEC                                                                                                             | 246.8                                            | E03.4, E07.89                                   |
| Disorders of the thyroid NOS                                                                                                             | 246.9                                            | E07.9                                           |
| Parathyroid disorder NEC                                                                                                                 | 252.8                                            | E21.4                                           |
| Parathyroid disorder NOS                                                                                                                 | 252.9                                            | E21.5                                           |
| Obstructive uropathy                                                                                                                     | 599.6*                                           | N13.9                                           |

Abbreviations: NEC, not elsewhere classified; NOS, not otherwise classified

**Supplemental Table 2. International Classifiers of Disease (ICD)-9 and ICD-10****codes used for history of diagnosis**

| <b>Diagnosis</b>               | <b>ICD-9 codes</b> | <b>ICD-10 codes</b> | <b>Other</b>                         |
|--------------------------------|--------------------|---------------------|--------------------------------------|
| Chronic kidney disease stage 3 | 585.1              | N18.1               | eGFR > 30 mL/min/1.73 m <sup>2</sup> |
|                                | 585.2              | N18.2               | but < 60 mL/min/1.73 m <sup>2</sup>  |
| Ischemic heart disease         | 410.*              | I20.*               |                                      |
|                                | 411.*              | I22.*               |                                      |
|                                | 413.*              | I24.*               |                                      |
|                                | 414.*              | I25.*               |                                      |
| Type 2 diabetes mellitus       | 250                | E11                 |                                      |
|                                | 250.*              | E11.*               |                                      |
|                                | 327.2*             | G47.3*              |                                      |
| Smoking                        | 305.1              | F17.*               |                                      |
|                                | V15.82             | Z87.891             |                                      |

Abbreviations: eGFR, estimated glomerular filtration rate

**Supplemental Table 3. The daily dose and frequency of thiazide diuretic and dihydropyridine calcium channel blocker prescription in patients with apparent treatment-resistant hypertension prior to spironolactone prescription**

| Medication                              | Daily dose | Patients prescribed, n (%)* |
|-----------------------------------------|------------|-----------------------------|
| Thiazide diuretic                       |            | 884                         |
|                                         | 12.5 mg    | 86 (9.7)                    |
|                                         | 25 mg      | 566 (64.0)                  |
|                                         | 50 mg      | 78 (8.8)                    |
|                                         | unknown    | 154 (17.4)                  |
| Dihydropyridine calcium channel blocker |            | 980                         |
| Amlodipine                              |            |                             |
|                                         | 2.5 mg     | 8 (0.8)                     |
|                                         | 5 mg       | 99 (10.1)                   |
|                                         | 7.5 mg     | 3 (0.3)                     |
|                                         | 10 mg      | 312 (31.8)                  |
|                                         | unknown    | 52 (5.3)                    |
| Nifedipine                              |            |                             |
|                                         | 30 mg      | 38 (3.9)                    |
|                                         | 60 mg      | 100 (10.2)                  |
|                                         | 90 mg      | 110 (11.2)                  |
|                                         | 120 mg     | 25 (2.6)                    |
|                                         | unknown    | 233 (23.8)                  |

\*The frequency of medication dose based on medication type, e.g. thiazide diuretic or dihydropyridine calcium channel blocker.

**Supplemental Table 4. Characteristics of spironolactone responders and nonresponders in European Americans.**

| Variable                                                               | N     | Nonresponders<br>(n=343) | Responders<br>(n=771) | p-value* |
|------------------------------------------------------------------------|-------|--------------------------|-----------------------|----------|
| Age, years                                                             | 1,114 | 65.66 ± 13.09            | 66.21 ± 12.04         | 0.50     |
| Female, n (%)                                                          | 1,114 | 151 (44.0%)              | 368 (47.7%)           | 0.25     |
| BMI, kg/m <sup>2</sup>                                                 | 1,023 | 31.3 ± 7.2               | 32.5 ± 7.7            | 0.01     |
| Diagnostic History                                                     |       |                          |                       |          |
| T2DM, n (%)                                                            | 1,114 | 173 (50.4%)              | 393 (51.0%)           | 0.87     |
| CKD3, n (%)                                                            | 1,114 | 124 (36.2%)              | 296 (38.4%)           | 0.48     |
| IHD, n (%)                                                             | 1,114 | 149 (43.4%)              | 280 (36.3%)           | 0.02     |
| Smoking, n (%)                                                         | 1,114 | 75 (21.9%)               | 157 (20.4%)           | 0.57     |
| Baseline measures                                                      |       |                          |                       |          |
| SBP, mmHg                                                              | 1,114 | 131.37 ± 16.99           | 145.91 ± 18.52        | < 0.001  |
| DBP, mmHg                                                              | 1,114 | 69.46 ± 10.88            | 76.78 ± 12.52         | < 0.001  |
| Serum sodium, mmol/L                                                   | 872   | 138.45 ± 3.26            | 139.04 ± 3.00         | 0.01     |
| Serum potassium, mmol/L                                                | 871   | 3.99 ± 0.46              | 3.93 ± 0.43           | 0.07     |
| Creatinine, mg/dL                                                      | 878   | 1.11 ± 0.37              | 1.07 ± 0.37           | 0.11     |
| eGFR, mL/min/1.73m <sup>2</sup>                                        | 1,029 | 75.16 ± 24.47            | 75.23 ± 19.83         | 0.96     |
| Glucose, mg/dL                                                         | 875   | 124.46 ± 56.69           | 126.59 ± 48.81        | 0.57     |
| HbA1c, %                                                               | 383   | 6.76 ± 1.67              | 7.24 ± 3.54           | 0.10     |
| HDL cholesterol, mg/dL                                                 | 420   | 46.96 ± 18.89            | 44.11 ± 14.83         | 0.10     |
| LDL cholesterol, mg/dL                                                 | 390   | 92.09 ± 37.86            | 95.30 ± 34.75         | 0.43     |
| Triglycerides, mg/dL                                                   | 426   | 167.8 ± 117.0            | 182.5 ± 129.4         | 0.27     |
| Difference from baseline following initial spironolactone prescription |       |                          |                       |          |
| Serum sodium, mmol/L                                                   | 810   | -0.70 ± 2.63             | -1.12 ± 2.71          | 0.04     |

|                                 |     |                 |                 |         |
|---------------------------------|-----|-----------------|-----------------|---------|
| Serum potassium, mmol/L         | 812 | 0.12 ± 0.48     | 0.27 ± 0.43     | < 0.001 |
| Creatinine, mg/dL               | 816 | 0.01 ± 0.23     | 0.13 ± 0.32     | < 0.001 |
| eGFR, mL/min/1.73m <sup>2</sup> | 924 | -4.82 ± 15.68   | -8.76 ± 14.51   | < 0.001 |
| Glucose, mg/dL                  | 810 | 1.44 ± 47.52    | 0.01 ± 39.03    | 0.65    |
| HbA1c, %                        | 181 | -0.13 ± 1.31    | -0.05 ± 0.92    | 0.63    |
| HDL cholesterol, mg/dL          | 156 | 0.03 ± 9.35     | -0.94 ± 8.62    | 0.54    |
| LDL cholesterol, mg/dL          | 142 | -7.29 ± 35.21   | -8.63 ± 35.09   | 0.86    |
| Triglycerides, mg/dL            | 162 | -11.99 ± 107.79 | -22.93 ± 121.66 | 0.59    |

Abbreviations: BMI, body mass index; CKD 3, chronic kidney disease stage three; DBP, diastolic blood pressure; eGFR, estimated glomerular filtration rate; HbA1c, hemoglobin A1c; HDL, high-density lipoprotein; IHD, ischemic heart disease; LDL, low-density lipoprotein; N, number of individuals with the specific measure; SBP, systolic blood pressure.

Data are presented as mean ± standard deviation for continuous variables and count (%) for categorical variables.

\* P-values from the multivariable regression model are provided for all variables except HbA1c, HDL cholesterol, LDL cholesterol, and triglycerides. Univariate p-values are provided for these variables.

**Supplemental Table 5. Characteristics of spironolactone responders and nonresponders in African Americans.**

| Variable                        | N   | Nonresponders<br>(n=106) | Responders<br>(n=263) | p-value* |
|---------------------------------|-----|--------------------------|-----------------------|----------|
| Age, years                      | 369 | 57.23 ± 11.30            | 58.65 ± 12.64         | 0.32     |
| Female, n (%)                   | 369 | 64 (60.3%)               | 164 (62.4%)           | 0.72     |
| BMI, kg/m <sup>2</sup>          | 335 | 35.3 ± 9.7               | 37.3 ± 9.2            | 0.40     |
| Diagnostic History              |     |                          |                       |          |
| T2DM, n (%)                     | 369 | 63 (59.4%)               | 173 (65.7%)           | 0.25     |
| CKD3, n (%)                     | 369 | 39 (36.8%)               | 102 (38.8%)           | 0.72     |
| IHD, n (%)                      | 369 | 30 (28.3%)               | 71 (27.0%)            | 0.80     |
| Smoking, n (%)                  | 369 | 21 (19.8%)               | 211 (20.5%)           | 0.87     |
| Baseline measures               |     |                          |                       |          |
| SBP, mmHg                       | 369 | 139.15 ± 17.46           | 152.51 ± 18.40        | < 0.001  |
| DBP, mmHg                       | 369 | 78.78 ± 11.67            | 85.50 ± 12.53         | < 0.001  |
| Serum sodium, mmol/L            | 304 | 139.37 ± 3.00            | 139.81 ± 2.85         | 0.23     |
| Serum potassium, mmol/L         | 304 | 3.81 ± 0.50              | 3.84 ± 0.44           | 0.58     |
| Creatinine, mg/dL               | 306 | 1.14 ± 0.33              | 1.16 ± 0.54           | 0.73     |
| eGFR, mL/min/1.73m <sup>2</sup> | 353 | 81.69 ± 20.78            | 83.42 ± 22.80         | 0.51     |
| Glucose, mg/dL                  | 304 | 129.05 ± 64.32           | 128.05 ± 55.37        | 0.89     |
| HbA1c, %                        | 155 | 7.45 ± 2.17              | 7.22 ± 1.65           | 0.50     |
| HDL cholesterol, mg/dL          | 155 | 49.07 ± 14.93            | 49.21 ± 15.95         | 0.56     |
| LDL cholesterol, mg/dL          | 147 | 106.51 ± 43.81           | 106.70 ± 33.43        | 0.98     |

|                                                                        |     |                 |                |      |
|------------------------------------------------------------------------|-----|-----------------|----------------|------|
| Triglycerides, mg/dL                                                   | 152 | 151.35 ± 92.16  | 135.01 ± 88.22 | 0.34 |
| Difference from baseline following initial spironolactone prescription |     |                 |                |      |
| Serum sodium, mmol/L                                                   | 291 | 0.17 ± 2.52     | -0.52 ± 2.63   | 0.05 |
| Serum potassium, mmol/L                                                | 292 | 0.16 ± 0.50     | 0.19 ± 0.39    | 0.57 |
| Creatinine, mg/dL                                                      | 292 | 0.06 ± 0.23     | 0.14 ± 0.26    | 0.01 |
| eGFR, mL/min/1.73m <sup>2</sup>                                        | 330 | -6.50 ± 15.89   | -9.99 ± 16.61  | 0.09 |
| Glucose, mg/dL                                                         | 291 | -5.56 ± 48.63   | -1.37 ± 44.65  | 0.48 |
| HbA1c, %                                                               | 103 | -0.54 ± 0.97    | 0.02 ± 1.23    | 0.09 |
| HDL cholesterol, mg/dL                                                 | 58  | 3.17 ± 17.66    | -1.67 ± 10.92  | 0.24 |
| LDL cholesterol, mg/dL                                                 | 55  | 0.04 ± 19.86    | -4.82 ± 34.85  | 0.65 |
| Triglycerides, mg/dL                                                   | 58  | -43.47 ± 109.99 | -11.64 ± 61.01 | 0.21 |

Abbreviations: BMI, body mass index; CKD 3, chronic kidney disease stage three; DBP, diastolic blood pressure; eGFR, estimated glomerular filtration rate; HbA1c, hemoglobin A1c; HDL, high-density lipoprotein; IHD, ischemic heart disease; LDL, low-density lipoprotein; N, number of individuals with the specific measure; SBP, systolic blood pressure.

Data are presented as mean ± standard deviation for continuous variables and count (%) for categorical variables.

\* P-values from the multivariable regression model are provided for all variables except HbA1c, HDL cholesterol, LDL cholesterol, and triglycerides. Univariate p-values are provided for these variables.
